# Supplementary material for: Exploring the Impact of Cerebrovascular Disease and Major Depression on Non-diseased Human Tissue Transcriptomes
Source: Front Genet. 2021 Jul 19;12:696836. doi: 10.3389/fgene.2021.696836 (PMC8327210; doi:10.3389/fgene.2021.696836)
Supplement: Supplementary Table 1 — Significantly differentially expressed genes in CVD analysis. [file Table_1.XLSX]

## Sheet: Adipose - Visceral (Omentum)
Table S1. Limma result table of significant CVD differential expression genes (FDR < 0.05 and log2FC > 1.5)
ESID	ID	logFC	AveExpr	t	P.Value	adj.P.Val	B
ENSG00000172995.16	ARPP21	-1.14252	3.43299	-5.48532	6.38589e-08	0.000928029	7.80455
ENSG00000224525.2	RP11-561I11.3	-1.48019	6.40421	-5.50104	5.86986e-08	0.000928029	7.75458
ENSG00000259985.1	RP11-549B18.1	-0.724653	4.47994	-5.38788	1.07184e-07	0.00103843	7.26566
ENSG00000138207.13	RBP4	-1.16662	13.0352	-5.18517	3.07e-07	0.00177604	6.20117
ENSG00000228971.2	RP11-286B14.1	-1.16272	4.96832	-5.14817	3.70649e-07	0.00177604	6.14128
ENSG00000050628.20	PTGER3	-0.65758	12.2351	-5.10004	4.7277e-07	0.00177604	5.81568
ENSG00000269933.1	RP3-333A15.2	-0.745518	5.49381	-5.06995	5.49953e-07	0.00177604	5.75396
ENSG00000166123.13	GPT2	-0.987447	11.5897	-5.08538	5.08962e-07	0.00177604	5.7396
ENSG00000149809.14	TM7SF2	-0.915092	10.6266	-5.07837	5.27209e-07	0.00177604	5.69924
ENSG00000185818.7	NAT8L	-1.19353	11.0347	-5.03829	6.44227e-07	0.00187245	5.52696
ENSG00000056998.19	GYG2	-1.05813	12.2906	-5.01602	7.19753e-07	0.00190178	5.44081
ENSG00000166947.11	EPB42	-1.02434	6.94237	-4.99839	7.85523e-07	0.0019026	5.40009
ENSG00000184811.3	TUSC5	-1.10244	13.1953	-4.93916	1.05172e-06	0.00218345	5.11315
ENSG00000160862.12	AZGP1	-1.08407	11.0729	-4.94302	1.03197e-06	0.00218345	5.11257
ENSG00000271239.1	RP11-238F2.1	-1.10447	2.34632	-4.85356	1.59526e-06	0.00272743	4.86992
ENSG00000166823.5	MESP1	-0.936374	8.29233	-4.88208	1.38944e-06	0.00263117	4.86594
ENSG00000147676.13	MAL2	-0.866751	9.28432	-4.87351	1.44843e-06	0.00263117	4.81193
ENSG00000161243.8	FBXO27	-0.71479	8.86804	-4.8227	1.85098e-06	0.00298881	4.60037
ENSG00000166819.11	PLIN1	-1.08203	14.9649	-4.81095	1.95833e-06	0.00299573	4.57673
ENSG00000172137.18	CALB2	-0.857745	12.2243	-4.77017	2.37963e-06	0.00329352	4.38652
ENSG00000041515.15	MYO16	-0.843019	7.28734	-4.7104	3.15809e-06	0.00389089	4.15646
ENSG00000095203.14	EPB41L4B	-0.869567	10.4651	-4.71011	3.16237e-06	0.00389089	4.12272
ENSG00000130876.11	SLC7A10	-1.0487	11.076	-4.70675	3.21285e-06	0.00389089	4.11154
ENSG00000164638.10	SLC29A4	-1.09168	10.5906	-4.69765	3.35324e-06	0.00389847	4.07244
ENSG00000176194.17	CIDEA	-1.1571	12.0972	-4.65954	4.00848e-06	0.00448102	3.9237
ENSG00000267069.1	RP11-64C12.8	-0.991473	4.09436	-4.56983	6.07196e-06	0.00653636	3.63952
ENSG00000105357.15	MYH14	-0.860219	9.36511	-4.53197	7.22025e-06	0.00749488	3.40266
ENSG00000135447.16	PPP1R1A	-0.923819	12.9012	-4.52391	7.49048e-06	0.00750726	3.38101
ENSG00000176720.4	BOK	-0.627013	12.09	-4.49639	8.48731e-06	0.00822279	3.26797
ENSG00000167676.4	PLIN4	-1.01821	15.9804	-4.48069	9.11148e-06	0.00854275	3.22373
ENSG00000134548.9	SPX	-1.26154	7.22111	-4.45728	1.01251e-05	0.00919648	3.13447
ENSG00000187288.10	CIDEC	-1.01084	13.8757	-4.44058	1.09128e-05	0.00929427	3.05493
ENSG00000181092.9	ADIPOQ	-1.09271	14.5939	-4.4354	1.1169e-05	0.00929427	3.03744
ENSG00000123612.15	ACVR1C	-1.04527	10.7327	-4.43494	1.11921e-05	0.00929427	3.01704
ENSG00000250266.1	LINC01612	-1.11971	3.01649	-4.41356	1.23136e-05	0.0098043	3.00203
ENSG00000101405.3	OXT	-0.681703	3.38489	-4.40841	1.25997e-05	0.0098043	2.98135
ENSG00000177822.7	AC108142.1	-0.846393	7.5499	-4.39879	1.31507e-05	0.0098043	2.89508
ENSG00000120049.18	KCNIP2	-0.943739	12.0201	-4.3987	1.31556e-05	0.0098043	2.88159
ENSG00000177666.16	PNPLA2	-0.619048	15.463	-4.38362	1.40662e-05	0.00982567	2.84042
ENSG00000169692.12	AGPAT2	-0.827787	13.9088	-4.38151	1.41985e-05	0.00982567	2.82477
ENSG00000165478.6	HEPACAM	-0.959464	7.74541	-4.3369	1.72867e-05	0.011419	2.65586
ENSG00000158571.10	PFKFB1	-0.899705	9.35101	-4.3231	1.83653e-05	0.0118619	2.58542
ENSG00000214456.8	PLIN5	-0.751414	11.8347	-4.31487	1.90387e-05	0.0120125	2.55836
ENSG00000176399.3	DMRTA1	-0.773317	6.34879	-4.30102	2.02262e-05	0.0120125	2.52979
ENSG00000177465.4	ACOT4	-0.644276	7.45272	-4.30073	2.02517e-05	0.0120125	2.51493
ENSG00000135917.13	SLC19A3	-0.826341	12.2953	-4.29538	2.07294e-05	0.01205	2.48577
ENSG00000008323.15	PLEKHG6	-0.896216	9.73654	-4.25834	2.43449e-05	0.0136079	2.33762
ENSG00000131095.12	GFAP	-0.87676	7.41656	-4.23651	2.67497e-05	0.0142225	2.27247
ENSG00000173599.13	PC	-0.766622	12.2985	-4.23509	2.69134e-05	0.0142225	2.25761
ENSG00000178821.12	TMEM52	-0.657782	5.83565	-4.22715	2.78488e-05	0.014454	2.25228
ENSG00000197696.9	NMB	-0.719031	10.2965	-4.21003	2.99715e-05	0.0145187	2.1558
ENSG00000249487.6	LINC01586	-0.808934	3.82348	-4.18309	3.36272e-05	0.0153095	2.09803
ENSG00000171773.2	NXNL1	-0.823746	5.06388	-4.1825	3.3711e-05	0.0153095	2.09014
ENSG00000168004.9	HRASLS5	-0.641617	10.5943	-4.19009	3.26381e-05	0.0153004	2.08226
ENSG00000167588.12	GPD1	-0.9407	14.5268	-4.16583	3.61878e-05	0.0157731	2.00613
ENSG00000260459.2	FTLP14	-0.604029	0.722614	-4.14935	3.88707e-05	0.0161397	1.92267
ENSG00000177359.17	OVOS2	-0.836692	4.53791	-4.13026	4.20622e-05	0.0165176	1.89623
ENSG00000124003.12	MOGAT1	-1.03634	4.56357	-4.12242	4.34745e-05	0.0165176	1.86788
ENSG00000005249.12	PRKAR2B	-0.767509	13.2536	-4.12508	4.29904e-05	0.0165176	1.85203
ENSG00000203930.10	LINC00632	-0.656518	6.41173	-4.12114	4.37098e-05	0.0165176	1.8491
ENSG00000124253.10	PCK1	-0.896847	12.8408	-4.12466	4.30663e-05	0.0165176	1.8491
ENSG00000198765.11	SYCP1	-0.886247	3.37167	-4.1178	4.43273e-05	0.0165176	1.84834
ENSG00000169006.6	NTSR2	-1.07316	3.66533	-4.1097	4.5862e-05	0.0168732	1.81254
ENSG00000152270.8	PDE3B	-0.757124	11.4819	-4.10258	4.72519e-05	0.0171672	1.7635
ENSG00000227591.5	RP1-28O10.1	-0.909764	7.27296	-4.06147	5.60942e-05	0.0197035	1.62594
ENSG00000234753.5	FOXP4-AS1	-0.798182	3.53172	-4.05785	5.69446e-05	0.0197035	1.62559
ENSG00000144834.13	TAGLN3	-0.801529	2.2766	-4.06049	5.63226e-05	0.0197035	1.60631
ENSG00000232901.1	CYCSP10	-0.597356	3.08622	-4.04439	6.02127e-05	0.0205892	1.57336
ENSG00000258545.5	RHOXF1-AS1	-0.893566	7.20721	-4.02052	6.64499e-05	0.0221996	1.4783
ENSG00000164076.16	CAMKV	-0.731107	1.8595	-4.00586	7.05793e-05	0.0227932	1.38082
ENSG00000169710.8	FASN	-0.910212	16.0203	-3.96843	8.22582e-05	0.0246478	1.29163
ENSG00000134463.14	ECHDC3	-0.726546	11.5564	-3.97083	8.1457e-05	0.0246478	1.29061
ENSG00000245848.2	CEBPA	-0.851092	11.1366	-3.9648	8.34825e-05	0.0247594	1.26806
ENSG00000174145.7	NWD2	-1.09532	8.67612	-3.95797	8.5834e-05	0.0251996	1.24825
ENSG00000162620.15	LRRIQ3	-0.680929	5.62017	-3.95386	8.72812e-05	0.0253683	1.24604
ENSG00000170262.12	MRAP	-0.969635	6.7002	-3.9177	0.000101032	0.0279666	1.11523
ENSG00000188611.14	ASAH2	-0.681125	4.47898	-3.90213	0.000107566	0.0294943	1.06334
ENSG00000119927.13	GPAM	-0.982397	14.0219	-3.8952	0.000110596	0.0300417	1.03017
ENSG00000226629.1	LINC00974	-0.785593	2.78467	-3.88231	0.000116459	0.0313414	0.971055
ENSG00000182782.7	HCAR2	-0.764221	9.11375	-3.87813	0.000118418	0.0315764	0.965621
ENSG00000042445.13	RETSAT	-0.616199	13.4144	-3.84489	0.000135176	0.034394	0.85546
ENSG00000234235.1	BOK-AS1	-0.836305	3.01618	-3.84684	0.000134133	0.034394	0.844425
ENSG00000133317.14	LGALS12	-0.856689	11.1637	-3.82114	0.000148498	0.0362698	0.769755
ENSG00000253686.1	LINC01484	-1.05754	3.68926	-3.81789	0.000150412	0.0364309	0.757004
ENSG00000137561.4	TTPA	-0.600333	5.81762	-3.81035	0.000154948	0.0369144	0.741971
ENSG00000145920.14	CPLX2	-0.895723	3.40351	-3.81042	0.000154908	0.0369144	0.730632
ENSG00000236319.2	CTD-2033D24.2	-0.82471	3.08804	-3.79862	0.000162262	0.0379771	0.678341
ENSG00000253230.8	LINC00599	-0.799807	2.75392	-3.79695	0.000163328	0.0379771	0.66809
ENSG00000259916.1	RP11-407P15.2	-0.886376	7.51235	-3.78004	0.000174521	0.0390503	0.635273
ENSG00000236333.3	TRHDE-AS1	-0.773384	10.5028	-3.76658	0.000183935	0.0405004	0.583895
ENSG00000180066.9	C10orf91	-0.714579	2.05458	-3.7842	0.000171703	0.0389886	0.583632
ENSG00000226549.3	SCDP1	-0.907253	2.40567	-3.77048	0.000181307	0.0402265	0.557718
ENSG00000174332.5	GLIS1	-0.617924	6.6436	-3.7488	0.000197111	0.0426415	0.530918
ENSG00000185640.5	KRT79	-1.045	5.27539	-3.73115	0.000211069	0.044779	0.470323
ENSG00000166816.13	LDHD	-0.686135	9.92983	-3.72051	0.000219924	0.0455904	0.430224
ENSG00000124743.5	KLHL31	-0.773746	9.20644	-3.72021	0.000220185	0.0455904	0.429753
ENSG00000079435.9	LIPE	-0.717308	14.4184	-3.71623	0.000223589	0.0457649	0.4202
ENSG00000175445.14	LPL	-0.617298	15.5086	-3.71072	0.000228391	0.0464208	0.402454
ENSG00000135324.5	MRAP2	0.648233	5.02446	3.6891	0.000248159	0.0489767	0.330887
ENSG00000224940.8	PRRT4	-0.803406	9.99026	-3.68765	0.000249547	0.0489767	0.321552

## Sheet: Artery - Tibial
ESID	ID	logFC	AveExpr	t	P.Value	adj.P.Val	B
ENSG00000158528.11	PPP1R9A	-0.610152	10.2122	-5.98581	3.58504e-09	0.000104199	10.3192
ENSG00000232926.1	AC000078.5	-0.633528	5.05542	-5.19882	2.70076e-07	0.000891331	6.46522
ENSG00000279530.2	RP11-398J13.1	-0.710197	5.18892	-4.96723	8.7225e-07	0.00161118	5.3969
ENSG00000165186.11	PTCHD1	-0.636943	10.827	-4.89796	1.22755e-06	0.00177053	5.05064
ENSG00000116690.12	PRG4	-1.12575	11.6849	-4.89478	1.24689e-06	0.00177053	5.04052
ENSG00000105357.15	MYH14	-0.716167	7.21476	-4.88955	1.27924e-06	0.00177053	5.0158
ENSG00000254162.1	RP11-48B3.3	-0.589148	5.48414	-4.66135	3.82365e-06	0.00349847	4.05201
ENSG00000268379.1	CTC-360J11.4	-0.655606	4.18207	-4.42602	1.12812e-05	0.00528854	3.07999
ENSG00000258044.1	RP11-530C5.2	-0.649275	2.78601	-4.3812	1.37873e-05	0.00589308	2.87735
ENSG00000171714.10	ANO5	-0.612506	9.05355	-4.36291	1.49559e-05	0.00596401	2.8064
ENSG00000280323.1	AC053503.12	-0.646813	8.4705	-4.35771	1.53052e-05	0.00596401	2.78455
ENSG00000149972.10	CNTN5	-0.79276	6.0246	-4.34762	1.60053e-05	0.00596401	2.75975
ENSG00000034971.16	MYOC	-0.836736	12.4881	-4.34821	1.59637e-05	0.00596401	2.75731
ENSG00000253998.3	IGKV2-29	0.619327	0.401703	4.34997	1.58428e-05	0.00596401	2.62623
ENSG00000261499.2	CH17-260O16.1	-0.590273	3.44339	-4.29903	1.98255e-05	0.00640253	2.56217
ENSG00000103226.17	NOMO3	-0.608139	8.47849	-4.28693	2.09042e-05	0.00651698	2.50745
ENSG00000112164.5	GLP1R	-1.04072	3.35796	-4.28449	2.11285e-05	0.00651698	2.47706
ENSG00000256564.1	RP11-424M22.3	-0.662306	2.32219	-4.23426	2.62879e-05	0.00717759	2.26421
ENSG00000228742.9	RP5-884M6.1	0.638716	0.608051	4.24931	2.46277e-05	0.0070177	2.2447
ENSG00000165178.9	NCF1C	0.71669	4.70376	4.19318	3.13803e-05	0.00753708	2.15703
ENSG00000261742.5	LINC00922	0.818882	1.10544	4.20062	3.03937e-05	0.00753708	2.12856
ENSG00000077274.8	CAPN6	-1.02718	7.11665	-4.15759	3.65381e-05	0.00793191	2.01901
ENSG00000188042.7	ARL4C	0.638878	8.94596	4.14927	3.78556e-05	0.00794887	1.98468
ENSG00000140030.5	GPR65	0.639067	5.20798	4.14706	3.82138e-05	0.00794887	1.98003
ENSG00000232599.1	RP1-161N10.1	-0.661785	2.83655	-4.12416	4.21109e-05	0.00838325	1.85927
ENSG00000134061.5	CD180	0.804392	4.87986	4.0946	4.77027e-05	0.00877518	1.78277
ENSG00000112799.8	LY86	0.635939	6.18018	4.08685	4.92826e-05	0.00895249	1.75133
ENSG00000230155.6	RP3-477O4.14	0.64159	1.37426	4.03274	6.17726e-05	0.0103185	1.48172
ENSG00000242950.6	ERVW-1	-0.617844	4.45115	-3.96276	8.24171e-05	0.0120558	1.28712
ENSG00000225383.7	SFTA1P	0.708925	3.90386	3.93341	9.28904e-05	0.0124881	1.18489
ENSG00000282122.1	IGHV7-4-1	0.682882	0.442091	3.96682	8.10716e-05	0.0120549	1.12591
ENSG00000211650.2	IGLV5-45	0.58595	0.380154	3.94968	8.69642e-05	0.0123903	1.03762
ENSG00000112149.9	CD83	0.673444	7.1587	3.8737	0.000118214	0.0134731	0.97802
ENSG00000158050.4	DUSP2	0.824481	6.46671	3.87253	0.000118767	0.0134731	0.97397
ENSG00000120457.11	KCNJ5	0.693311	5.03358	3.86441	0.000122693	0.0137687	0.943304
ENSG00000197674.5	OR51C1P	-0.805397	2.94124	-3.85803	0.000125865	0.0139628	0.849045
ENSG00000186818.12	LILRB4	0.764423	6.2796	3.8212	0.00014574	0.0155733	0.793885
ENSG00000179331.2	RAB39A	0.753633	2.52544	3.81373	0.000150117	0.0158331	0.732925
ENSG00000283647.1	RP11-265B7.1	-0.726654	2.74819	-3.79726	0.000160208	0.016125	0.628812
ENSG00000203747.10	FCGR3A	0.614721	9.4763	3.74919	0.000193454	0.0179068	0.544491
ENSG00000175063.16	UBE2C	0.644532	4.03904	3.74717	0.00019498	0.0179339	0.52408
ENSG00000178562.17	CD28	0.646541	5.83313	3.73472	0.000204666	0.01836	0.49443
ENSG00000167483.17	FAM129C	0.59071	3.22336	3.7234	0.000213866	0.0186667	0.429921
ENSG00000112299.7	VNN1	0.648755	5.17368	3.71265	0.00022296	0.019116	0.41581
ENSG00000230387.2	RP4-737E23.2	-0.713764	4.98086	-3.68325	0.000249717	0.0201612	0.302283
ENSG00000264707.1	L3MBTL4-AS1	0.796877	2.01837	3.66839	0.000264372	0.0207115	0.209056
ENSG00000143768.12	LEFTY2	-0.689731	8.91771	-3.62821	0.000308124	0.0225016	0.138435
ENSG00000120907.17	ADRA1A	-0.758043	7.02525	-3.60855	0.000331922	0.0233801	0.0688792
ENSG00000184144.11	CNTN2	-0.667057	5.32693	-3.61196	0.000327682	0.0233801	0.0667928
ENSG00000133454.15	MYO18B	-0.605481	7.83884	-3.59779	0.000345679	0.023865	0.0376608
ENSG00000137078.8	SIT1	0.635235	3.2323	3.60511	0.000336265	0.0234021	0.0271695
ENSG00000271503.5	CCL5	0.648649	6.68479	3.59172	0.000353669	0.0240509	0.0176452
ENSG00000276085.1	CCL3L3	1.05708	2.8933	3.59511	0.000349184	0.0239364	-0.00549594
ENSG00000243238.1	IGKV2-30	1.02891	1.35322	3.60942	0.000330844	0.0233801	-0.0203835
ENSG00000164483.16	SAMD3	0.68586	4.41987	3.58421	0.000363785	0.0243627	-0.021488
ENSG00000174898.15	CATSPERD	-0.63411	3.41575	-3.5965	0.000347357	0.0238674	-0.0245333
ENSG00000153820.12	SPHKAP	-0.922697	6.06195	-3.54128	0.000427068	0.0255142	-0.159619
ENSG00000100558.8	PLEK2	0.606671	4.34838	3.54254	0.000425074	0.0255142	-0.161339
ENSG00000211662.2	IGLV3-21	1.26187	2.28002	3.5453	0.000420731	0.0253704	-0.182357
ENSG00000259225.6	RP11-1008C21.1	0.767309	1.70954	3.54749	0.000417327	0.0253087	-0.220574
ENSG00000237515.8	SHISA9	-0.649374	3.4778	-3.53876	0.000431092	0.0255708	-0.222134
ENSG00000172995.16	ARPP21	-0.822116	5.05512	-3.52551	0.000452801	0.0262164	-0.224182
ENSG00000177519.3	RPRM	-0.688304	4.56093	-3.52085	0.000460685	0.026258	-0.248884
ENSG00000185737.12	NRG3	-0.59216	5.60973	-3.51222	0.000475607	0.0266349	-0.257091
ENSG00000175857.8	GAPT	0.60326	4.86079	3.49553	0.000505773	0.0276095	-0.308658
ENSG00000132704.15	FCRL2	0.646597	0.787764	3.54073	0.000427943	0.0255142	-0.344301
ENSG00000111057.10	KRT18	0.648982	9.9009	3.47971	0.000536001	0.0286536	-0.348571
ENSG00000071991.8	CDH19	-0.615191	8.4865	-3.46938	0.000556636	0.0289149	-0.376084
ENSG00000121895.7	TMEM156	0.73924	1.9283	3.49562	0.0005056	0.0276095	-0.376448
ENSG00000140522.11	RLBP1	-0.610637	1.12564	-3.55202	0.000410342	0.0253087	-0.392206
ENSG00000178401.14	DNAJC22	0.646412	3.39794	3.47532	0.000544682	0.0286536	-0.396543
ENSG00000169442.8	CD52	0.678197	5.18614	3.45864	0.00057888	0.0292103	-0.42143
ENSG00000007062.11	PROM1	-0.855834	7.83836	-3.4514	0.000594339	0.0295796	-0.435297
ENSG00000132639.12	SNAP25	-0.727919	8.26966	-3.44579	0.000606599	0.0298827	-0.450835
ENSG00000156885.5	COX6A2	-0.621237	4.4288	-3.45879	0.000578562	0.0292103	-0.452402
ENSG00000150337.13	FCGR1A	0.632262	6.32078	3.42883	0.000645057	0.0307021	-0.507335
ENSG00000152092.15	ASTN1	-0.627488	2.95214	-3.45916	0.000577792	0.0292103	-0.513938
ENSG00000154645.13	CHODL	-0.686527	7.43786	-3.42423	0.000655884	0.0307472	-0.522296
ENSG00000128165.8	ADM2	0.670476	2.28013	3.42547	0.000652929	0.0307472	-0.593159
ENSG00000050555.17	LAMC3	-0.684396	8.1783	-3.39622	0.000725483	0.0322868	-0.606973
ENSG00000160791.13	CCR5	0.669795	4.92152	3.39489	0.000728938	0.0322966	-0.627335
ENSG00000163630.10	SYNPR	-0.629715	1.24617	-3.47464	0.000546158	0.0286536	-0.636629
ENSG00000198019.12	FCGR1B	0.650803	4.38159	3.38088	0.000766462	0.0331022	-0.678384
ENSG00000211640.4	IGLV6-57	1.04972	1.30087	3.41163	0.000686386	0.0314666	-0.680111
ENSG00000089685.14	BIRC5	0.611845	4.24603	3.36487	0.000811514	0.0336952	-0.732684
ENSG00000277632.1	CCL3	0.807383	3.3565	3.36568	0.000809166	0.0336952	-0.741604
ENSG00000272282.1	LINC02084	0.625538	2.45097	3.3719	0.000791435	0.0333875	-0.75849
ENSG00000206432.4	TMEM200C	-0.585049	3.68026	-3.35227	0.000848667	0.0341518	-0.81241
ENSG00000164326.4	CARTPT	-0.963637	3.84111	-3.36132	0.000821826	0.0338502	-0.83323
ENSG00000111796.3	KLRB1	0.753095	3.75262	3.3286	0.000922848	0.0353107	-0.849542
ENSG00000125538.11	IL1B	0.824114	3.90434	3.3267	0.000929026	0.0353107	-0.853333
ENSG00000139304.12	PTPRQ	-0.596122	8.08052	-3.31391	0.000971843	0.0358915	-0.859922
ENSG00000227507.2	LTB	0.596568	3.94349	3.31759	0.000959356	0.0358247	-0.883768
ENSG00000222037.5	IGLC6	0.800352	0.892926	3.36179	0.000820449	0.0338502	-0.899059
ENSG00000095777.14	MYO3A	-0.615032	8.3148	-3.29704	0.00103109	0.036968	-0.910322
ENSG00000129195.15	FAM64A	0.657698	2.90476	3.31715	0.00096084	0.0358247	-0.914736
ENSG00000255741.1	RP11-757G1.5	-0.642976	4.86533	-3.29582	0.0010355	0.036968	-0.954064
ENSG00000196460.12	RFX8	0.600616	4.68118	3.27913	0.00109766	0.0378003	-0.987051
ENSG00000211751.9	TRBC1	0.718796	4.41891	3.26704	0.00114479	0.0384219	-1.02661
ENSG00000224650.2	IGHV3-74	0.932125	1.77042	3.29096	0.00105324	0.0371511	-1.03432
ENSG00000253671.1	RP11-806O11.1	-0.633776	6.30687	-3.25461	0.00119525	0.039343	-1.05341
ENSG00000239855.1	IGKV1-6	0.904483	1.09502	3.29405	0.00104194	0.036968	-1.07967
ENSG00000101349.16	PAK5	-0.950429	5.63581	-3.25116	0.0012096	0.039458	-1.08319
ENSG00000261003.1	RP1-140C12.2	-0.598291	2.88549	-3.26195	0.00116521	0.038705	-1.13492
ENSG00000254363.6	CTB-131B5.5	-0.609696	3.91461	-3.23577	0.00127562	0.0406981	-1.16198
ENSG00000243264.2	IGKV2D-29	0.653203	0.570958	3.30402	0.00100686	0.0367037	-1.16243
ENSG00000230825.1	AC005532.5	0.601599	1.62095	3.24416	0.00123923	0.0401542	-1.21583
ENSG00000118785.13	SPP1	0.889904	8.8869	3.18384	0.00152376	0.0439365	-1.25221
ENSG00000113088.5	GZMK	0.723866	3.59639	3.19724	0.00145577	0.0429126	-1.25238
ENSG00000150893.10	FREM2	-0.60568	2.52323	-3.22845	0.00130814	0.0413335	-1.2677
ENSG00000261150.2	EPPK1	-0.627951	6.77187	-3.17339	0.00157878	0.0446664	-1.28883
ENSG00000077009.13	NMRK2	-0.66611	6.45007	-3.15338	0.00168936	0.046018	-1.35204
ENSG00000182866.16	LCK	0.66972	4.75377	3.14601	0.00173183	0.0464778	-1.38056
ENSG00000280660.1	RP11-437J2.3	-0.593895	2.63424	-3.18916	0.00149644	0.0435813	-1.39332
ENSG00000261026.1	CTD-3247F14.2	-0.778156	5.91985	-3.13662	0.00178736	0.0470561	-1.40937
ENSG00000136689.18	IL1RN	0.635071	5.54114	3.12762	0.00184212	0.0476771	-1.42385
ENSG00000116824.4	CD2	0.68225	4.45835	3.13076	0.00182288	0.0476184	-1.42963
ENSG00000022556.15	NLRP2	0.644734	2.59407	3.14779	0.00172146	0.0463976	-1.43867
ENSG00000276070.4	CCL4L2	0.893717	3.2556	3.11922	0.00189469	0.0480953	-1.48984
ENSG00000049249.8	TNFRSF9	0.630151	1.7316	3.12523	0.00185697	0.0477341	-1.5595
ENSG00000239268.2	RP11-384F7.2	-0.61117	2.20243	-3.1468	0.00172724	0.0463976	-1.56318
ENSG00000162892.15	IL24	0.729911	2.63961	3.09705	0.00203995	0.0497614	-1.57952
ENSG00000253522.5	MIR3142HG	0.672352	2.181	3.10509	0.00198614	0.0491713	-1.58502
ENSG00000147614.3	ATP6V0D2	0.635152	0.587648	3.1567	0.00167149	0.045918	-1.61378
ENSG00000137745.11	MMP13	0.804598	0.617703	3.12797	0.00184129	0.0476771	-1.66523

## Sheet: Brain - Caudate (basal ganglia)
ESID	ID	logFC	AveExpr	t	P.Value	adj.P.Val	B
ENSG00000169403.11	PTAFR	0.965375	7.6756	5.36427	1.93157e-07	0.00443201	6.55548
ENSG00000163154.5	TNFAIP8L2	0.942849	6.18505	5.2712	3.04972e-07	0.00443201	6.18827
ENSG00000184574.9	LPAR5	0.986003	7.81917	5.06226	8.32279e-07	0.0080634	5.27377
ENSG00000145569.5	FAM105A	0.661142	7.40284	4.69297	4.55666e-06	0.0257487	3.79932
ENSG00000275395.4	FCGBP	1.17367	9.07887	4.68644	4.69148e-06	0.0257487	3.75185
ENSG00000163106.10	HPGDS	1.16679	5.69002	4.6573	5.34217e-06	0.0257487	3.67905
ENSG00000105383.14	CD33	0.873849	5.9513	4.62368	6.2013e-06	0.0257487	3.54691
ENSG00000095585.16	BLNK	0.981301	6.83647	4.49107	1.10768e-05	0.0338628	3.02869
ENSG00000174123.10	TLR10	0.795961	6.41039	4.46868	1.22008e-05	0.0338628	2.95069
ENSG00000122122.9	SASH3	0.774439	7.45047	4.44936	1.32583e-05	0.0338628	2.8653
ENSG00000128815.19	WDFY4	0.787629	7.44663	4.43462	1.4124e-05	0.0338628	2.8109
ENSG00000230138.1	RP11-117D22.2	1.16126	1.13295	4.36605	1.89141e-05	0.0338628	2.63202
ENSG00000171812.12	COL8A2	0.710854	7.173	4.36172	1.92634e-05	0.0338628	2.54448
ENSG00000165025.14	SYK	0.728332	8.30386	4.35063	2.01878e-05	0.0338628	2.49326
ENSG00000157303.10	SUSD3	0.917127	6.36788	4.33672	2.1408e-05	0.0338628	2.46057
ENSG00000228058.1	LINC01736	1.16384	6.02599	4.27083	2.82083e-05	0.0338628	2.22198
ENSG00000105122.12	RASAL3	0.707896	7.34292	4.26514	2.88843e-05	0.0338628	2.19119
ENSG00000247774.6	PCED1B-AS1	0.796329	6.39517	4.24467	3.14457e-05	0.0338628	2.12538
ENSG00000198286.9	CARD11	0.795346	6.895	4.24514	3.1385e-05	0.0338628	2.12323
ENSG00000197471.11	SPN	0.771283	6.42978	4.22917	3.3528e-05	0.0338628	2.06934
ENSG00000125730.16	C3	0.956669	12.1515	4.23139	3.32224e-05	0.0338628	2.06811
ENSG00000134516.15	DOCK2	0.810372	7.95415	4.22903	3.35475e-05	0.0338628	2.0556
ENSG00000203747.10	FCGR3A	1.13176	9.7621	4.21783	3.51344e-05	0.0338628	2.00918
ENSG00000110934.10	BIN2	0.624263	7.86256	4.21155	3.60553e-05	0.0338628	1.99549
ENSG00000103490.13	PYCARD	0.623943	6.42058	4.20562	3.69466e-05	0.0338628	1.98639
ENSG00000251442.5	LINC01094	0.775768	8.03852	4.20148	3.75804e-05	0.0338628	1.95677
ENSG00000107099.15	DOCK8	0.739837	8.59165	4.20194	3.75099e-05	0.0338628	1.9555
ENSG00000166428.12	PLD4	0.850396	8.14858	4.20061	3.77158e-05	0.0338628	1.95357
ENSG00000183160.8	TMEM119	0.796257	8.19579	4.17944	4.11365e-05	0.0338628	1.87812
ENSG00000165168.7	CYBB	0.877265	9.19603	4.17343	4.21599e-05	0.0338628	1.851
ENSG00000142347.16	MYO1F	0.610985	8.84515	4.1528	4.58644e-05	0.0338628	1.78057
ENSG00000182578.13	CSF1R	0.813777	10.8274	4.15079	4.62402e-05	0.0338628	1.77374
ENSG00000204482.10	LST1	0.680742	7.64009	4.14792	4.67846e-05	0.0338628	1.77139
ENSG00000086730.16	LAT2	0.702603	8.78638	4.13292	4.97254e-05	0.0338628	1.71076
ENSG00000077420.15	APBB1IP	0.762136	8.5325	4.09323	5.83814e-05	0.0380594	1.57407
ENSG00000104974.11	LILRA1	0.774142	5.86105	4.07765	6.21552e-05	0.0392726	1.53781
ENSG00000066294.14	CD84	0.77825	7.62697	4.06787	6.46436e-05	0.0399759	1.49158
ENSG00000162511.7	LAPTM5	0.808342	10.9847	4.05654	6.76444e-05	0.0409601	1.44695
ENSG00000101194.17	SLC17A9	0.619127	6.92501	4.05098	6.91646e-05	0.0410259	1.43797
ENSG00000229635.1	RP4-713B5.2	-0.819253	4.2433	-4.02252	7.74708e-05	0.0428504	1.36559
ENSG00000140749.8	IGSF6	0.684509	7.09812	4.01759	7.90027e-05	0.0428504	1.32238
ENSG00000255980.1	AP000439.1	1.11155	5.41508	4.00864	8.18586e-05	0.0428504	1.30142
ENSG00000169896.16	ITGAM	0.700992	8.58683	4.01072	8.11852e-05	0.0428504	1.29005
ENSG00000123338.12	NCKAP1L	0.646702	8.68924	4.00648	8.25606e-05	0.0428504	1.27528
ENSG00000019582.14	CD74	0.815994	13.2051	4.0016	8.41722e-05	0.0429205	1.26815
ENSG00000271605.5	MILR1	0.767112	6.28205	3.98455	9.00387e-05	0.0434044	1.21392
ENSG00000158517.13	NCF1	0.744586	5.60379	3.97747	9.25881e-05	0.0434044	1.19367

## Sheet: Brain - Hypothalamus
ESID	ID	logFC	AveExpr	t	P.Value	adj.P.Val	B
ENSG00000167612.12	ANKRD33	-1.24065	2.56408	-4.70025	4.93401e-06	0.0286814	3.84439
ENSG00000276672.1	RP11-142E9.1	-0.948644	4.37403	-4.6239	6.8864e-06	0.0301911	3.47999
ENSG00000237886.1	NALT1	-0.950643	4.3857	-4.57672	8.44509e-06	0.0301911	3.29849
ENSG00000184647.10	PRSS55	-1.17505	2.8556	-4.46444	1.36406e-05	0.0304973	2.91903
ENSG00000186352.8	ANKRD37	0.664342	8.62327	4.4857	1.24649e-05	0.0301911	2.87207
ENSG00000236423.5	LINC01134	0.941535	3.88378	4.3955	1.82304e-05	0.033896	2.60753
ENSG00000171360.3	KRT38	0.780537	0.499462	4.35209	2.1846e-05	0.0340957	2.51334
ENSG00000213700.3	RPL17P50	0.853609	4.72199	4.36703	2.05301e-05	0.0340957	2.49077
ENSG00000268362.5	CTD-2017D11.1	0.627826	6.61105	4.24876	3.34272e-05	0.0379757	2.04858
ENSG00000230711.2	CTAGE13P	0.727322	0.470636	4.21716	3.83397e-05	0.0404944	2.00699
ENSG00000120215.9	MLANA	0.94448	2.51574	4.20406	4.00861e-05	0.0404944	1.94208
ENSG00000007171.16	NOS2	-0.763621	6.57264	-4.1983	4.103e-05	0.0404944	1.88451
ENSG00000205642.9	VCX3B	-1.0764	2.52066	-4.13565	5.27861e-05	0.0453062	1.71855
ENSG00000205959.3	RP11-689P11.2	-0.752889	8.10987	-4.12576	5.49137e-05	0.0456019	1.61738

## Sheet: Brain - Spinal cord (cervical c
ESID	ID	logFC	AveExpr	t	P.Value	adj.P.Val	B
ENSG00000133048.12	CHI3L1	2.62278	10.1188	5.86437	2.7521e-08	0.000270818	8.56407
ENSG00000226648.1	PLCG1-AS1	-1.01955	5.40015	-5.83498	3.17812e-08	0.000270818	8.50254
ENSG00000272068.1	RP11-284F21.9	-1.24704	5.77474	-5.76833	4.39805e-08	0.000270818	8.19928
ENSG00000130429.12	ARPC1B	1.10266	10.6749	5.75646	4.65884e-08	0.000270818	8.07669
ENSG00000214193.10	SH3D21	0.95429	8.01629	5.67375	6.94725e-08	0.000336536	7.70329
ENSG00000275395.4	FCGBP	2.42759	9.40012	5.6404	8.15396e-08	0.000338564	7.56806
ENSG00000100060.17	MFNG	1.04345	8.68034	5.5471	1.27249e-07	0.000435742	7.15056
ENSG00000166278.14	C2	1.46177	8.11273	5.36299	3.02165e-07	0.000793386	6.3708
ENSG00000254153.1	CTA-398F10.2	0.608442	0.0491675	5.43977	3.69741e-07	0.000793386	6.31992
ENSG00000117984.13	CTSD	0.685837	14.1924	5.19565	6.52797e-07	0.00110632	5.70279
ENSG00000030582.17	GRN	0.716025	11.8928	5.18503	6.85148e-07	0.00110632	5.6458
ENSG00000164733.20	CTSB	0.897843	14.1559	5.04417	1.29358e-06	0.00187989	5.08203
ENSG00000230839.1	RP5-968J1.1	-1.17159	3.27862	-5.01604	1.46662e-06	0.00198966	5.00143
ENSG00000109861.15	CTSC	1.06272	10.4442	4.99041	1.64374e-06	0.00198966	4.84737
ENSG00000100300.17	TSPO	0.663826	11.0484	4.98132	1.71139e-06	0.00198966	4.81243
ENSG00000101160.13	CTSZ	0.771834	12.0726	4.96789	1.8164e-06	0.00203053	4.76443
ENSG00000226476.3	LINC01748	-1.3959	5.45529	-4.88925	2.56828e-06	0.0023795	4.47676
ENSG00000244968.6	LIFR-AS1	-0.76304	8.00339	-4.8931	2.52536e-06	0.0023795	4.46685
ENSG00000178199.13	ZC3H12D	1.02526	6.13509	4.86037	2.91408e-06	0.0023795	4.3402
ENSG00000010327.10	STAB1	1.3827	11.3885	4.85345	3.00338e-06	0.0023795	4.30918
ENSG00000182022.17	CHST15	0.767738	9.89748	4.85381	2.99864e-06	0.0023795	4.30125
ENSG00000166002.6	SMCO4	0.764864	8.3296	4.85149	3.02913e-06	0.0023795	4.29149
ENSG00000104774.12	MAN2B1	0.682736	10.7845	4.84486	3.1179e-06	0.00238478	4.26982
ENSG00000159128.14	IFNGR2	0.658854	10.5345	4.83615	3.23843e-06	0.00241346	4.23447
ENSG00000175489.9	LRRC25	1.42021	7.32969	4.81309	3.57968e-06	0.00260108	4.14364
ENSG00000272732.1	RP5-1159O4.2	-0.962717	7.35519	-4.76982	4.31602e-06	0.00298679	3.9881
ENSG00000233901.5	LINC01503	1.12823	6.48489	4.75317	4.63685e-06	0.0030975	3.91725
ENSG00000175567.8	UCP2	0.969878	10.3008	4.75056	4.68915e-06	0.0030975	3.90111
ENSG00000159189.11	C1QC	1.44202	11.7394	4.74291	4.84588e-06	0.0031299	3.87859
ENSG00000171729.13	TMEM51	0.921545	7.94241	4.73488	5.0158e-06	0.00316922	3.83891
ENSG00000143995.19	MEIS1	-0.598422	10.94	-4.64807	7.26244e-06	0.00420145	3.50527
ENSG00000149418.10	ST14	2.08944	6.16711	4.63662	7.62307e-06	0.00426085	3.46683
ENSG00000112759.16	SLC29A1	0.803262	9.74343	4.62948	7.85654e-06	0.0043085	3.43468
ENSG00000116883.8	RP11-268J15.5	0.843341	8.18108	4.60839	8.58762e-06	0.00445713	3.35498
ENSG00000187688.14	TRPV2	0.99127	8.07658	4.59778	8.9802e-06	0.00457911	3.3149
ENSG00000113532.12	ST8SIA4	0.840406	8.67209	4.58516	9.469e-06	0.00461865	3.2659
ENSG00000163191.5	S100A11	1.0355	11.04	4.58352	9.53446e-06	0.00461865	3.26548
ENSG00000099337.4	KCNK6	0.80259	8.08103	4.5547	1.07574e-05	0.00496292	3.15329
ENSG00000076944.15	STXBP2	1.00658	9.12506	4.54007	1.14351e-05	0.00501403	3.09684
ENSG00000148288.11	GBGT1	0.865034	8.30565	4.53266	1.17935e-05	0.00501403	3.06992
ENSG00000072110.13	ACTN1	1.063	10.7121	4.52475	1.21887e-05	0.00501403	3.04385
ENSG00000133111.3	RFXAP	-0.594712	8.75378	-4.52474	1.21893e-05	0.00501403	3.0429
ENSG00000155465.18	SLC7A7	1.09294	8.94309	4.52325	1.22648e-05	0.00501403	3.03399
ENSG00000253671.1	RP11-806O11.1	-1.53294	4.76424	-4.51413	1.27386e-05	0.00502045	3.01434
ENSG00000153071.14	DAB2	0.74467	10.2564	4.50659	1.3144e-05	0.00505878	2.9741
ENSG00000233334.3	FAM53B-AS1	-1.06988	4.97344	-4.49873	1.3579e-05	0.00505878	2.95718
ENSG00000111348.8	ARHGDIB	0.953825	11.3826	4.49709	1.36717e-05	0.00505878	2.94201
ENSG00000183631.4	PRR32	-1.75212	2.68753	-4.49673	1.375e-05	0.00505878	2.91556
ENSG00000173369.15	C1QB	1.45841	12.2051	4.47924	1.47199e-05	0.00528337	2.87806
ENSG00000111405.8	ENDOU	-0.842646	6.51679	-4.47783	1.48055e-05	0.00528337	2.87655
ENSG00000130309.10	COLGALT1	0.682201	11.1762	4.46679	1.54959e-05	0.00528337	2.82858
ENSG00000155629.14	PIK3AP1	1.22413	9.06098	4.46641	1.55206e-05	0.00528337	2.82347
ENSG00000173372.16	C1QA	1.36257	11.3942	4.45682	1.61462e-05	0.00528337	2.79326
ENSG00000125454.11	SLC25A19	0.788428	7.89244	4.45206	1.64651e-05	0.00528337	2.77208
ENSG00000198951.11	NAGA	0.673939	9.96882	4.45153	1.6501e-05	0.00528337	2.76937
ENSG00000283431.1	RP11-1217F2.22	-1.67704	4.53026	-4.44828	1.67236e-05	0.00528337	2.7632
ENSG00000102879.15	CORO1A	1.00881	10.7012	4.44854	1.67055e-05	0.00528337	2.76057
ENSG00000183734.4	ASCL2	1.44128	5.07027	4.44078	1.72469e-05	0.00533279	2.73772
ENSG00000273749.4	CYFIP1	0.898029	11.7606	4.41916	1.88457e-05	0.00568721	2.65426
ENSG00000169403.11	PTAFR	1.33204	8.79195	4.41766	1.89619e-05	0.00568721	2.64396
ENSG00000147576.15	ADHFE1	-0.58796	9.7905	-4.41742	1.89802e-05	0.00568721	2.64308
ENSG00000064763.10	FAR2	0.591401	8.26804	4.40655	1.98427e-05	0.00582555	2.60448
ENSG00000168961.16	LGALS9	0.908645	10.5813	4.4023	2.01901e-05	0.00586825	2.5903
ENSG00000110719.9	TCIRG1	0.852371	10.4806	4.38964	2.12605e-05	0.00611819	2.54378
ENSG00000064886.13	CHI3L2	2.06071	9.48328	4.36268	2.37234e-05	0.00661317	2.44581
ENSG00000144843.11	ADPRH	0.621861	8.54373	4.35458	2.45154e-05	0.00667163	2.41459
ENSG00000103365.15	GGA2	0.621797	10.9679	4.34955	2.502e-05	0.00667163	2.39835
ENSG00000165140.9	FBP1	1.05338	7.13057	4.33679	2.63452e-05	0.00689841	2.35243
ENSG00000175544.13	CABP4	0.70554	6.19118	4.33067	2.70052e-05	0.00693263	2.33277
ENSG00000010610.9	CD4	0.963627	10.5943	4.33071	2.70006e-05	0.00693263	2.32996
ENSG00000057252.12	SOAT1	0.667985	10.1825	4.32548	2.75771e-05	0.00693263	2.31009
ENSG00000129226.13	CD68	1.13291	11.0968	4.32171	2.79992e-05	0.00693263	2.29837
ENSG00000175538.10	KCNE3	1.11567	7.09994	4.3014	3.03831e-05	0.0072384	2.22477
ENSG00000233038.5	AC011899.9	1.84523	4.82505	4.2702	3.44303e-05	0.0079422	2.11493
ENSG00000160255.17	ITGB2	1.19317	11.2828	4.26701	3.48727e-05	0.00798091	2.10195
ENSG00000157227.12	MMP14	0.952824	9.73847	4.26383	3.53186e-05	0.0080198	2.08869
ENSG00000125637.15	PSD4	0.673608	9.06104	4.25511	3.65683e-05	0.00814852	2.05674
ENSG00000233061.1	TTLL7-IT1	-1.58774	3.08683	-4.25977	3.58955e-05	0.00808761	2.02845
ENSG00000163513.17	TGFBR2	0.929988	11.2204	4.24132	3.86344e-05	0.00837991	2.01
ENSG00000174600.13	CMKLR1	0.899044	8.65524	4.23488	3.96365e-05	0.00847085	1.98509
ENSG00000244509.3	APOBEC3C	0.856652	8.818	4.22574	4.11011e-05	0.00865655	1.95257
ENSG00000172985.10	SH3RF3	0.837069	8.74649	4.2195	4.21311e-05	0.00867461	1.93059
ENSG00000118640.10	VAMP8	0.896348	9.44108	4.21791	4.23975e-05	0.00867461	1.92524
ENSG00000146094.13	DOK3	0.935475	8.88303	4.21764	4.24428e-05	0.00867461	1.92406
ENSG00000230910.2	RP3-525N10.2	-0.669955	10.8454	-4.21583	4.27476e-05	0.00867461	1.91791
ENSG00000111199.10	TRPV4	1.14105	5.09898	4.20772	4.41438e-05	0.00872961	1.89142
ENSG00000146112.11	PPP1R18	0.743707	10.6864	4.20767	4.41511e-05	0.00872961	1.89008
ENSG00000137491.14	SLCO2B1	0.852578	12.4738	4.20526	4.45748e-05	0.00875383	1.88259
ENSG00000106868.16	SUSD1	0.954094	7.71188	4.18268	4.87306e-05	0.00928878	1.80167
ENSG00000151702.16	FLI1	0.783902	10.055	4.18016	4.92163e-05	0.00928878	1.79262
ENSG00000146386.7	ABRACL	0.747559	7.57801	4.16191	5.28784e-05	0.00972728	1.72901
ENSG00000203650.8	LINC01285	-0.881752	7.52475	-4.15665	5.39809e-05	0.00986765	1.7111
ENSG00000128340.14	RAC2	1.05026	8.62065	4.15042	5.53164e-05	0.00997044	1.68795
ENSG00000224397.5	SMIM25	1.73047	4.45911	4.14924	5.55724e-05	0.00997044	1.68427
ENSG00000108950.11	FAM20A	1.49265	6.54084	4.14745	5.59627e-05	0.00997887	1.67866
ENSG00000106560.10	GIMAP2	0.929248	8.16394	4.13564	5.86112e-05	0.0103874	1.63669
ENSG00000166888.11	STAT6	0.777442	10.7484	4.12791	6.04075e-05	0.0105134	1.61022
ENSG00000135605.12	TEC	0.86134	5.40371	4.12133	6.19777e-05	0.0107225	1.58667
ENSG00000163154.5	TNFAIP8L2	1.19131	7.498	4.11832	6.27091e-05	0.0107287	1.57672
ENSG00000197943.9	PLCG2	0.778647	9.63713	4.11675	6.30953e-05	0.0107287	1.57093
ENSG00000116711.9	PLA2G4A	0.874357	8.80828	4.11664	6.31211e-05	0.0107287	1.57042
ENSG00000117676.13	RPS6KA1	0.621151	10.6343	4.11204	6.42637e-05	0.0107967	1.55494
ENSG00000166130.14	IKBIP	0.700665	7.94123	4.10542	6.59405e-05	0.0110147	1.53189
ENSG00000237949.1	LINC00844	-0.785419	11.3417	-4.09984	6.73842e-05	0.0111355	1.51252
ENSG00000138172.10	CALHM2	0.60909	8.69548	4.09784	6.791e-05	0.0111514	1.50538
ENSG00000051523.10	CYBA	0.843321	10.8956	4.08702	7.08215e-05	0.0113725	1.46838
ENSG00000066336.11	SPI1	0.968894	10.0168	4.08421	7.1597e-05	0.0113926	1.45855
ENSG00000053918.15	KCNQ1	0.917617	7.54547	4.08324	7.18665e-05	0.0113926	1.45528
ENSG00000179855.5	GIPC3	0.968229	6.97068	4.07073	7.54314e-05	0.0115679	1.41213
ENSG00000276980.1	CTD-3128G10.7	2.04363	5.88847	4.06873	7.60181e-05	0.0115679	1.40516
ENSG00000163131.10	CTSS	1.07829	10.7171	4.0622	7.79594e-05	0.0117404	1.38277
ENSG00000138311.15	ZNF365	-0.594229	11.4871	-4.05424	8.03908e-05	0.0119824	1.35541
ENSG00000170075.8	GPR37L1	-0.618421	12.4358	-4.04838	8.22245e-05	0.0120207	1.33525
ENSG00000186517.13	ARHGAP30	0.805511	9.408	4.04813	8.23027e-05	0.0120207	1.33438
ENSG00000184574.9	LPAR5	1.22332	8.9685	4.03779	8.56423e-05	0.012262	1.29902
ENSG00000042493.15	CAPG	1.01326	11.0473	4.03476	8.66453e-05	0.0123448	1.28856
ENSG00000132170.19	PPARG	0.788087	7.10943	4.03332	8.71286e-05	0.0123531	1.28355
ENSG00000152213.3	ARL11	1.1507	6.01416	4.0271	8.92336e-05	0.0125293	1.26145
ENSG00000187808.4	SOWAHD	1.37764	5.11546	4.02427	9.02058e-05	0.0125446	1.25035
ENSG00000127249.14	ATP13A4	-0.776375	8.15965	-4.02251	9.08159e-05	0.0125694	1.24638
ENSG00000154080.13	CHST9	-0.836685	7.40709	-4.01844	9.2244e-05	0.0127065	1.23133
ENSG00000073849.14	ST6GAL1	0.87448	11.5465	4.0111	9.4871e-05	0.0128852	1.20758
ENSG00000091106.18	NLRC4	0.888703	6.6215	4.00791	9.60352e-05	0.0128976	1.19641
ENSG00000125898.12	FAM110A	0.820146	6.81938	4.00778	9.60855e-05	0.0128976	1.1961
ENSG00000177096.8	FAM109B	0.660474	6.4321	4.00721	9.62939e-05	0.0128976	1.19352
ENSG00000271714.1	CTD-2377O17.1	-0.782565	6.98323	-3.9884	0.000103462	0.0133649	1.12788
ENSG00000096996.15	IL12RB1	0.774104	6.89149	3.98397	0.00010522	0.0134724	1.11519
ENSG00000011600.11	TYROBP	0.95978	10.8238	3.98279	0.000105695	0.0134738	1.11167
ENSG00000249096.6	RP11-290F5.1	-1.31631	3.97401	-3.9893	0.000103106	0.0133649	1.10176
ENSG00000138119.16	MYOF	0.867123	10.2295	3.97684	0.000108114	0.0134946	1.09182
ENSG00000089639.10	GMIP	0.83979	8.81043	3.97413	0.000109233	0.0134946	1.08291
ENSG00000034510.5	TMSB10	0.637234	13.3678	3.97474	0.000108979	0.0134946	1.08266
ENSG00000213445.9	SIPA1	0.646341	10.7524	3.97285	0.000109764	0.0134946	1.07822
ENSG00000162645.12	GBP2	1.04675	10.1627	3.96993	0.000110992	0.0134946	1.06841
ENSG00000186193.8	SAPCD2	-0.796672	9.34463	-3.96935	0.000111234	0.0134946	1.0666
ENSG00000248996.1	RP11-1334A24.6	1.24144	3.65862	3.9644	0.000113343	0.0135646	1.03874
ENSG00000175899.14	A2M	0.890228	14.0413	3.95437	0.000117738	0.0136882	1.01272
ENSG00000282021.1	CTD-2336O2.3	-0.864183	5.39354	-3.95442	0.000117713	0.0136882	1.00448
ENSG00000187840.4	EIF4EBP1	0.933108	8.17353	3.94784	0.000120683	0.0139127	0.994333
ENSG00000147804.9	SLC39A4	0.720492	6.74471	3.94441	0.000122259	0.0139127	0.981192
ENSG00000227115.7	LINC01630	-0.600736	9.35642	-3.9407	0.000123983	0.0139127	0.970328
ENSG00000147251.15	DOCK11	0.66343	9.05364	3.94055	0.000124051	0.0139127	0.970064
ENSG00000106348.16	IMPDH1	0.701783	9.86505	3.93206	0.000128094	0.0140192	0.94141
ENSG00000179627.9	ZBTB42	0.723057	5.94353	3.933	0.000127638	0.0140192	0.940979
ENSG00000167208.14	SNX20	1.05209	7.15808	3.92686	0.00013063	0.0141086	0.923296
ENSG00000142185.16	TRPM2	0.918619	9.93201	3.92475	0.000131673	0.0141086	0.916842
ENSG00000123338.12	NCKAP1L	0.984166	10.1563	3.91901	0.000134549	0.0142725	0.897496
ENSG00000110887.7	DAO	-1.10582	10.7096	-3.91447	0.000136866	0.0143208	0.88291
ENSG00000271605.5	MILR1	1.16431	7.86223	3.91305	0.000137598	0.0143208	0.877827
ENSG00000087266.15	SH3BP2	0.633259	10.894	3.91286	0.000137694	0.0143208	0.876641
ENSG00000104972.15	LILRB1	1.12826	9.05721	3.91235	0.000137961	0.0143208	0.875764
ENSG00000257702.3	LBX2-AS1	1.13234	4.8973	3.90893	0.000139743	0.0144542	0.857438
ENSG00000171700.13	RGS19	0.854261	9.09028	3.89692	0.00014618	0.0149146	0.824537
ENSG00000104518.10	GSDMD	0.606265	9.79097	3.8968	0.000146247	0.0149146	0.82394
ENSG00000112297.14	AIM1	0.594754	7.3692	3.89375	0.000147928	0.0149496	0.812597
ENSG00000178226.10	PRSS36	0.694724	5.24272	3.8952	0.000147126	0.0149496	0.811131
ENSG00000272983.1	RP11-508N22.12	-0.623046	7.08104	-3.89338	0.000148133	0.0149496	0.808052
ENSG00000140968.10	IRF8	1.26003	9.09899	3.88745	0.000151457	0.0149931	0.792974
ENSG00000144119.3	C1QL2	-0.926805	7.35456	-3.88619	0.000152175	0.0149931	0.784034
ENSG00000253276.2	CCDC71L	0.635647	8.48447	3.88209	0.000154525	0.015093	0.775126
ENSG00000163823.3	CCR1	1.22218	8.4674	3.8817	0.000154747	0.015093	0.773939
ENSG00000265962.1	GACAT2	-1.21542	4.8279	-3.88811	0.000151086	0.0149931	0.770623
ENSG00000205730.6	ITPRIPL2	0.880527	8.24601	3.88047	0.000155465	0.0151123	0.769702
ENSG00000164089.8	ETNPPL	-0.984304	11.0367	-3.87773	0.000157061	0.0152165	0.760815
ENSG00000106066.14	CPVL	1.20009	9.069	3.86788	0.000162938	0.0157336	0.728237
ENSG00000106853.18	PTGR1	0.611072	8.39606	3.85648	0.000170002	0.0161474	0.690439
ENSG00000183891.5	TTC32	-0.648178	9.03818	-3.85656	0.000169956	0.0161474	0.690265
ENSG00000103490.13	PYCARD	0.978692	7.78872	3.85216	0.000172756	0.0163139	0.67586
ENSG00000204103.3	MAFB	1.07472	9.53727	3.85197	0.000172878	0.0163139	0.675574
ENSG00000006747.14	SCIN	1.29065	10.5642	3.84854	0.000175099	0.0164701	0.663084
ENSG00000276231.4	PIK3R6	1.06803	7.15902	3.84568	0.000176967	0.0164857	0.653707
ENSG00000171777.15	RASGRP4	0.99068	7.2163	3.84039	0.000180473	0.0166555	0.636246
ENSG00000104549.11	SQLE	-0.699901	12.3811	-3.83576	0.000183595	0.0166756	0.620901
ENSG00000136167.13	LCP1	0.715181	11.2618	3.83579	0.00018358	0.0166756	0.620848
ENSG00000100365.14	NCF4	0.865478	8.63613	3.83264	0.000185731	0.0168171	0.612407
ENSG00000234906.9	APOC2	1.20576	10.0007	3.82788	0.000189034	0.0170101	0.595846
ENSG00000174599.5	TRAM1L1	-0.707121	9.03683	-3.82437	0.000191501	0.0170735	0.584355
ENSG00000149177.12	PTPRJ	0.605744	10.0569	3.82031	0.000194398	0.0172153	0.571636
ENSG00000122122.9	SASH3	0.921201	8.95927	3.81975	0.000194801	0.0172153	0.570346
ENSG00000198771.10	RCSD1	0.784004	9.68425	3.81783	0.000196189	0.0172153	0.56372
ENSG00000268001.1	CARD8-AS1	0.745361	6.64943	3.81702	0.00019677	0.0172153	0.557622
ENSG00000162511.7	LAPTM5	0.989222	12.7359	3.81707	0.000196738	0.0172153	0.55676
ENSG00000184060.10	ADAP2	0.813868	8.88752	3.81307	0.000199663	0.017323	0.548582
ENSG00000110077.14	MS4A6A	1.13006	10.229	3.81346	0.000199376	0.017323	0.548469
ENSG00000154589.6	LY96	1.00765	7.5159	3.80647	0.000204581	0.0174723	0.525726
ENSG00000126882.12	FAM78A	0.753632	9.03564	3.80179	0.000208134	0.0176368	0.5119
ENSG00000173258.12	ZNF483	-0.666468	7.94279	-3.79645	0.000212272	0.01778	0.490634
ENSG00000158517.13	NCF1	1.07807	7.10061	3.7938	0.000214345	0.0178328	0.483691
ENSG00000131042.14	LILRB2	0.951353	7.52148	3.78837	0.000218669	0.0179537	0.466711
ENSG00000185361.8	TNFAIP8L1	0.64029	7.90606	3.77733	0.000227703	0.0183329	0.431114
ENSG00000134061.5	CD180	1.30897	6.89631	3.77278	0.000231526	0.0184871	0.415203
ENSG00000133246.11	PRAM1	0.799368	9.3971	3.76948	0.000234345	0.0185212	0.406844
ENSG00000176244.6	ACBD7	-0.875831	8.02698	-3.76929	0.000234502	0.0185212	0.401822
ENSG00000110057.7	UNC93B1	0.659591	9.56054	3.76645	0.000236955	0.0186205	0.397025
ENSG00000236197.3	AC002429.5	-1.08166	4.21476	-3.77789	0.000227238	0.0183329	0.394194
ENSG00000254087.7	LYN	0.861619	9.87776	3.76561	0.000237681	0.0186205	0.393711
ENSG00000174327.6	SLC16A13	0.891422	4.53778	3.76945	0.000234363	0.0185212	0.391579
ENSG00000171812.12	COL8A2	0.879563	8.69799	3.76219	0.000240675	0.0187052	0.383274
ENSG00000149781.12	FERMT3	0.804321	9.25048	3.76057	0.000242101	0.0187272	0.378148
ENSG00000128294.15	TPST2	0.702454	9.72025	3.75319	0.000248708	0.0190229	0.354003
ENSG00000236106.1	AC010729.2	-1.36685	4.84831	-3.76217	0.000240693	0.0187052	0.348664
ENSG00000203747.10	FCGR3A	1.37815	11.3989	3.75218	0.000249628	0.0190377	0.347095
ENSG00000272894.5	RP5-1159O4.1	-0.741689	8.62051	-3.75087	0.000250828	0.0190377	0.344513
ENSG00000152315.4	KCNK13	1.21427	6.4692	3.74773	0.00025371	0.019159	0.332647
ENSG00000104998.3	IL27RA	0.721317	7.67084	3.74684	0.000254537	0.019159	0.332178
ENSG00000205744.9	DENND1C	0.752389	8.66801	3.74447	0.000256738	0.019159	0.326292
ENSG00000255737.2	AGAP2-AS1	0.659492	5.43882	3.74602	0.000255295	0.019159	0.320638
ENSG00000103522.15	IL21R	1.4135	5.18659	3.7439	0.000257272	0.019159	0.315851
ENSG00000089820.15	ARHGAP4	0.673518	10.7999	3.738	0.000262859	0.0192443	0.303577
ENSG00000233264.2	AC006042.8	-1.3266	2.87067	-3.75898	0.000243513	0.0187272	0.271357
ENSG00000213654.9	GPSM3	0.757944	9.64662	3.72715	0.000273424	0.0196872	0.270351
ENSG00000115956.9	PLEK	0.949942	9.41074	3.72417	0.000276395	0.0196872	0.260928
ENSG00000108798.8	ABI3	0.90174	9.17658	3.7228	0.000277772	0.0196872	0.256788
ENSG00000167083.6	GNGT2	0.947521	6.12203	3.72352	0.000277048	0.0196872	0.25247
ENSG00000005884.17	ITGA3	0.809616	9.11037	3.71785	0.000282805	0.0197116	0.2412
ENSG00000247774.6	PCED1B-AS1	0.944753	7.88724	3.71461	0.000286139	0.0198015	0.229583
ENSG00000142347.16	MYO1F	0.833031	10.4789	3.71233	0.000288514	0.0198713	0.221537
ENSG00000100504.16	PYGL	0.772194	9.66302	3.70402	0.000297313	0.0203807	0.196344
ENSG00000196154.11	S100A4	0.923934	8.99366	3.69906	0.00030268	0.0206282	0.181163
ENSG00000249700.8	SRD5A3-AS1	-0.691336	7.18627	-3.70079	0.000300795	0.0205709	0.17794
ENSG00000169413.2	RNASE6	1.04452	8.84568	3.69575	0.000306325	0.0207167	0.170449
ENSG00000163840.9	DTX3L	0.620486	9.87446	3.69498	0.000307168	0.0207167	0.167499
ENSG00000263528.7	IKBKE	0.6899	7.68204	3.69422	0.000308021	0.0207167	0.163659
ENSG00000256268.1	RP11-221N13.3	0.78109	0.263432	3.74096	0.000263618	0.0192514	0.154847
ENSG00000234896.1	OR7E62P	1.03804	0.531379	3.72366	0.00027691	0.0196872	0.135344
ENSG00000130707.17	ASS1	0.69866	10.2611	3.68456	0.000318922	0.0210538	0.133673
ENSG00000243838.1	PSMC1P7	0.615739	0.147249	3.73786	0.000274154	0.0196872	0.122447
ENSG00000161929.14	SCIMP	1.12896	6.5702	3.67626	0.000328583	0.0213845	0.103837
ENSG00000204472.12	AIF1	1.04115	10.5497	3.67308	0.000332365	0.0214671	0.096156
ENSG00000171631.14	P2RY6	1.21513	5.56884	3.67477	0.000330351	0.0213845	0.0944519
ENSG00000253958.1	CLDN23	0.887368	4.93129	3.67504	0.000330027	0.0213845	0.0896907
ENSG00000105851.10	PIK3CG	1.17707	6.25153	3.67074	0.000335166	0.0215269	0.0850189
ENSG00000213203.2	GIMAP1	0.796053	8.57456	3.66031	0.000347934	0.0219689	0.0580384
ENSG00000102524.11	TNFSF13B	0.904972	8.25311	3.6599	0.000348449	0.0219689	0.0564289
ENSG00000142694.6	EVA1B	0.614451	7.26471	3.66047	0.000347741	0.0219689	0.0549527
ENSG00000185527.11	PDE6G	1.15998	3.39774	3.66805	0.000338415	0.0216177	0.0541021
ENSG00000026297.15	RNASET2	0.95211	11.933	3.65461	0.000355111	0.0222442	0.0347183
ENSG00000158869.10	FCER1G	1.00254	10.5694	3.65308	0.000357052	0.0223177	0.0328423
ENSG00000260855.1	RP11-439E19.10	-0.731229	8.94819	-3.65237	0.000357965	0.0223268	0.0311052
ENSG00000165025.14	SYK	0.985539	9.80169	3.64981	0.00036126	0.0224017	0.0240963
ENSG00000101336.13	HCK	1.03234	9.38127	3.64868	0.000362724	0.0224017	0.0210843
ENSG00000104894.11	CD37	0.955054	10.2221	3.64747	0.000364292	0.0224017	0.0160184
ENSG00000135077.8	HAVCR2	0.821518	10.329	3.64727	0.000364544	0.0224017	0.0154128
ENSG00000136404.15	TM6SF1	0.872595	8.04995	3.64689	0.000365049	0.0224017	0.0148533
ENSG00000125730.16	C3	1.2034	13.5414	3.64698	0.000364933	0.0224017	0.00621182
ENSG00000169026.12	MFSD7	0.610731	7.12198	3.64104	0.000372743	0.0227246	-0.00702091
ENSG00000138080.13	EMILIN1	0.814627	8.93784	3.63355	0.000382832	0.0230415	-0.0256232
ENSG00000253209.1	IGHV3-65	0.65722	0.0479315	3.72714	0.000346722	0.0219689	-0.0309566
ENSG00000080709.14	KCNN2	-0.707737	8.80172	-3.62844	0.000389864	0.0233601	-0.044744
ENSG00000197093.10	GAL3ST4	0.88876	8.86727	3.62576	0.000393604	0.0234909	-0.0500948
ENSG00000140749.8	IGSF6	1.17512	8.57371	3.62181	0.000399173	0.0237457	-0.0626428
ENSG00000163492.14	CCDC141	-1.23683	5.8439	-3.61945	0.000402529	0.0238766	-0.0962996
ENSG00000197471.11	SPN	0.894905	8.2254	3.60982	0.000416533	0.0245569	-0.100926
ENSG00000100292.16	HMOX1	0.733653	10.6832	3.60776	0.000419579	0.0246074	-0.109185
ENSG00000173221.13	GLRX	1.03174	9.61294	3.60226	0.000427837	0.0248205	-0.124767
ENSG00000101347.8	SAMHD1	0.644862	11.5079	3.6029	0.000426862	0.0248205	-0.126194
ENSG00000165457.13	FOLR2	1.10108	7.32126	3.60118	0.000429471	0.0248657	-0.129931
ENSG00000185267.9	CDNF	-0.71688	6.68309	-3.60381	0.000425492	0.0248205	-0.133012
ENSG00000146005.3	PSD2	-0.587358	11.726	-3.59973	0.000431682	0.0249318	-0.133975
ENSG00000151468.10	CCDC3	0.768072	9.25191	3.59698	0.000435908	0.0249318	-0.139969
ENSG00000233276.3	GPX1	0.612875	12.5865	3.59827	0.000433921	0.0249318	-0.143366
ENSG00000239998.5	LILRA2	1.05179	7.86263	3.59016	0.000446544	0.0251527	-0.162743
ENSG00000137699.16	TRIM29	-1.04569	7.76355	-3.59153	0.000444377	0.025128	-0.166282
ENSG00000223552.1	RP11-24F11.2	1.24113	4.09453	3.5957	0.000437882	0.0249318	-0.166789
ENSG00000228526.6	MIR34AHG	0.826098	7.51333	3.58584	0.0004534	0.0252493	-0.177717
ENSG00000008513.14	ST3GAL1	0.62951	9.45256	3.5805	0.000462023	0.0255298	-0.191256
ENSG00000255031.5	RP11-802E16.3	0.916546	3.86833	3.5858	0.000453471	0.0252493	-0.203031
ENSG00000105329.9	TGFB1	0.624101	10.5926	3.57251	0.000475205	0.0259621	-0.21837
ENSG00000133574.9	GIMAP4	0.730833	10.0219	3.57186	0.000476294	0.0259728	-0.219303
ENSG00000237945.7	LINC00649	1.05633	5.59652	3.57293	0.00047451	0.0259621	-0.226742
ENSG00000116701.14	NCF2	0.89016	8.98023	3.56861	0.000481777	0.0260724	-0.227881
ENSG00000137474.19	MYO7A	0.838415	8.95981	3.56812	0.000482607	0.0260724	-0.229406
ENSG00000160791.13	CCR5	1.0512	7.05532	3.56927	0.000480662	0.0260724	-0.230164
ENSG00000186654.20	PRR5	0.716312	8.33692	3.56153	0.000493914	0.0264376	-0.250816
ENSG00000188820.12	FAM26F	1.11472	6.44303	3.56055	0.000495609	0.0264692	-0.259732
ENSG00000100055.20	CYTH4	0.877132	9.43823	3.5576	0.000500777	0.0264948	-0.262406
ENSG00000003987.13	MTMR7	-0.618395	10.2759	-3.55623	0.000503187	0.0264948	-0.2659
ENSG00000165807.7	PPP1R36	-0.767548	7.50449	-3.55676	0.000502244	0.0264948	-0.274544
ENSG00000244694.7	PTCHD4	1.02768	4.7694	3.55856	0.000499076	0.0264948	-0.278298
ENSG00000283602.1	AC011380.8	1.11789	3.57041	3.56196	0.000493165	0.0264376	-0.279599
ENSG00000131981.15	LGALS3	0.685257	10.7956	3.551	0.000512485	0.0267186	-0.285504
ENSG00000126861.4	OMG	-0.734231	12.1099	-3.55085	0.000512752	0.0267186	-0.286145
ENSG00000132965.9	ALOX5AP	1.08134	9.75043	3.5482	0.000517549	0.0267186	-0.292546
ENSG00000105281.12	SLC1A5	0.931588	8.81457	3.54311	0.00052684	0.0269588	-0.306979
ENSG00000101000.5	PROCR	0.693807	7.84903	3.53685	0.000538506	0.0273144	-0.328159
ENSG00000104974.11	LILRA1	1.07403	7.35503	3.53636	0.000539427	0.0273144	-0.330566
ENSG00000131037.14	EPS8L1	0.93424	5.30036	3.53979	0.000532989	0.0271778	-0.332298
ENSG00000271474.1	RP11-710C12.1	-0.724444	8.97173	-3.53466	0.000542629	0.0273524	-0.335213
ENSG00000167613.15	LAIR1	0.91819	10.4814	3.53326	0.00054529	0.0273524	-0.339814
ENSG00000015285.10	WAS	0.74206	9.32034	3.52873	0.000553986	0.0275588	-0.350719
ENSG00000143119.12	CD53	0.913913	10.712	3.52753	0.000556315	0.0275588	-0.357934
ENSG00000235597.1	LINC01102	-0.848757	9.70896	-3.52593	0.000559425	0.0275588	-0.360283
ENSG00000271133.5	CTA-293F17.1	-0.78733	5.305	-3.53351	0.000544827	0.0273524	-0.366408
ENSG00000180340.6	FZD2	0.941687	6.1321	3.52631	0.000558679	0.0275588	-0.368166
ENSG00000163219.11	ARHGAP25	0.672649	8.70597	3.52249	0.000566156	0.0277025	-0.369887
ENSG00000223745.7	CCDC18-AS1	-0.712588	10.315	-3.52158	0.000567955	0.0277439	-0.371995
ENSG00000167851.13	CD300A	1.03332	8.9227	3.52055	0.00057001	0.0277601	-0.375989
ENSG00000183087.14	GAS6	0.611204	11.1709	3.51997	0.000571151	0.0277601	-0.381626
ENSG00000148803.11	FUOM	0.631225	6.85607	3.51758	0.000575931	0.0278064	-0.392029
ENSG00000165168.7	CYBB	1.12204	10.6459	3.51618	0.000578739	0.0278956	-0.392879
ENSG00000183960.8	KCNH8	-0.883849	10.943	-3.5136	0.000583951	0.0279202	-0.397312
ENSG00000237672.1	KRR1P1	-1.10542	4.47341	-3.52931	0.000552864	0.0275588	-0.39843
ENSG00000162777.16	DENND2D	0.858446	7.88738	3.51151	0.000588213	0.0279202	-0.405236
ENSG00000107099.15	DOCK8	0.867271	10.2521	3.51124	0.000588771	0.0279202	-0.406337
ENSG00000216490.3	IFI30	1.04576	10.4302	3.51089	0.00058948	0.0279202	-0.408522
ENSG00000151490.13	PTPRO	0.890028	7.9401	3.51016	0.000590972	0.0279202	-0.409201
ENSG00000135842.16	FAM129A	0.902154	9.0525	3.50893	0.000593496	0.0279202	-0.411075
ENSG00000174004.5	NRROS	0.803058	7.55787	3.50683	0.000597848	0.0279202	-0.420972
ENSG00000227165.7	WDR11-AS1	-0.706184	7.05282	-3.5083	0.000594802	0.0279202	-0.42681
ENSG00000258302.2	RP11-981P6.1	-0.717645	5.84486	-3.51096	0.000589342	0.0279202	-0.429274
ENSG00000187796.13	CARD9	1.0002	8.1498	3.50291	0.000606037	0.0279936	-0.430416
ENSG00000270096.1	RP11-362K14.6	-0.650652	6.92061	-3.50583	0.000599922	0.0279202	-0.434893
ENSG00000167895.14	TMC8	0.718467	9.89328	3.5003	0.000611555	0.0279936	-0.43852
ENSG00000158714.10	SLAMF8	1.24955	7.06153	3.49867	0.00061502	0.0279936	-0.446261
ENSG00000145685.13	LHFPL2	0.759893	10.5103	3.49578	0.000621197	0.0282111	-0.453974
ENSG00000169220.17	RGS14	0.624209	7.76451	3.49473	0.000623478	0.0282705	-0.457513
ENSG00000128604.19	IRF5	0.859943	9.2593	3.49146	0.000630564	0.0283245	-0.464271
ENSG00000179846.9	NKPD1	-0.724765	5.39253	-3.50022	0.000611712	0.0279936	-0.46798
ENSG00000106799.12	TGFBR1	0.623537	11.1254	3.49104	0.000631492	0.0283245	-0.469791
ENSG00000225460.1	RP13-93L13.1	-1.07782	5.10321	-3.50155	0.000608911	0.0279936	-0.471686
ENSG00000159713.10	TPPP3	-0.587372	13.2371	-3.49134	0.00063082	0.0283245	-0.472196
ENSG00000118849.9	RARRES1	0.921915	5.97583	3.49227	0.000628808	0.0283245	-0.47358
ENSG00000001626.14	CFTR	-0.847451	7.65438	-3.49161	0.000630227	0.0283245	-0.474385
ENSG00000026025.15	VIM	0.817024	13.5889	3.49014	0.000633456	0.0283689	-0.480735
ENSG00000118785.13	SPP1	0.641237	16.4455	3.49188	0.000629643	0.0283245	-0.483645
ENSG00000110446.10	SLC15A3	0.632828	9.88873	3.48321	0.000648819	0.0288347	-0.490199
ENSG00000019582.14	CD74	0.924258	15.3093	3.48875	0.000636512	0.028382	-0.490491
ENSG00000225940.5	C5orf67	-1.11559	1.45959	-3.53702	0.00053915	0.0273144	-0.50139
ENSG00000153029.14	MR1	0.633049	8.42408	3.47643	0.000664177	0.0292047	-0.510747
ENSG00000180758.11	GPR157	0.714178	5.699	3.48057	0.000654762	0.028966	-0.512348
ENSG00000172716.16	SLFN11	0.626988	9.49206	3.47526	0.000666869	0.0292149	-0.513307
ENSG00000155659.14	VSIG4	1.31812	9.48099	3.4743	0.000669077	0.0292149	-0.518035
ENSG00000104903.4	LYL1	0.704213	8.5437	3.47371	0.00067044	0.0292149	-0.518483
ENSG00000224307.1	RP11-344B5.2	1.22783	4.56511	3.47803	0.000660529	0.0291324	-0.526681
ENSG00000183578.6	TNFAIP8L3	0.788027	7.48482	3.46491	0.00069107	0.029651	-0.548512
ENSG00000230042.1	AK3P3	-0.863782	4.73875	-3.47702	0.000662834	0.0291898	-0.551183
ENSG00000160712.12	IL6R	0.607611	9.99345	3.46223	0.000697466	0.02976	-0.553867
ENSG00000206680.1	SNORD21	-0.972354	1.9457	-3.52	0.000571097	0.0277601	-0.561007
ENSG00000165478.6	HEPACAM	-0.620459	11.6064	-3.45986	0.00070318	0.02988	-0.562501
ENSG00000163932.13	PRKCD	0.784882	9.69515	3.45889	0.000705529	0.0298924	-0.563539
ENSG00000180198.15	RCC1	0.630359	8.72781	3.45469	0.000715793	0.0300753	-0.575525
ENSG00000205403.12	CFI	0.783447	8.9818	3.45387	0.000717792	0.0300753	-0.577866
ENSG00000188316.13	ENO4	-0.910015	5.31626	-3.45404	0.000717394	0.0300753	-0.612797
ENSG00000197249.13	SERPINA1	1.30194	10.1938	3.44305	0.000744932	0.0307919	-0.61402
ENSG00000077420.15	APBB1IP	0.983181	10.202	3.44229	0.000746888	0.0307919	-0.615201
ENSG00000180448.10	ARHGAP45	0.587771	10.7771	3.43961	0.000753767	0.0309876	-0.624031
ENSG00000137767.13	SQRDL	0.646026	9.05216	3.43743	0.000759402	0.031	-0.627026
ENSG00000260641.1	RP11-1299A16.3	-0.631506	8.50337	-3.43766	0.000758808	0.031	-0.631354
ENSG00000184988.8	TMEM106A	0.834653	7.50013	3.43253	0.000772247	0.0312609	-0.645727
ENSG00000155307.17	SAMSN1	0.899884	8.75124	3.42901	0.000781593	0.0315076	-0.652178
ENSG00000168995.13	SIGLEC7	1.40913	5.31818	3.42811	0.000783987	0.0315167	-0.669768
ENSG00000111885.6	MAN1A1	0.655562	9.42655	3.42286	0.000798165	0.0316922	-0.670518
ENSG00000141401.11	IMPA2	0.759092	6.74897	3.42502	0.000792294	0.0315601	-0.672484
ENSG00000279118.1	RP11-517I3.2	-0.599006	10.2898	-3.41328	0.000824646	0.0323897	-0.698644
ENSG00000185482.7	STAC3	0.694246	7.0456	3.41341	0.000824285	0.0323897	-0.705772
ENSG00000170374.5	SP7	-1.26735	5.0011	-3.4231	0.000797515	0.0316922	-0.716883
ENSG00000142552.7	RCN3	0.723052	8.60641	3.40524	0.000847504	0.0330506	-0.72339
ENSG00000112972.14	HMGCS1	-0.655535	11.9689	-3.40497	0.000848296	0.0330506	-0.727907
ENSG00000118308.15	LRMP	0.769155	8.16128	3.40091	0.000860051	0.0334116	-0.737546
ENSG00000138964.16	PARVG	0.850893	10.0823	3.39987	0.000863108	0.0334116	-0.741308
ENSG00000073331.17	ALPK1	0.685246	8.88742	3.39911	0.000865337	0.0334455	-0.741508
ENSG00000134333.13	LDHA	0.671207	12.912	3.39736	0.000870474	0.0335407	-0.757949
ENSG00000224950.2	RP5-1086K13.1	0.897493	4.36247	3.40176	0.000857579	0.0333675	-0.762922
ENSG00000174837.14	ADGRE1	1.58787	4.96673	3.3971	0.000871261	0.0335407	-0.763856
ENSG00000139292.12	LGR5	-0.789542	10.7481	-3.3915	0.00088795	0.0338329	-0.763951
ENSG00000198113.2	TOR4A	0.758301	7.56931	3.39158	0.000887724	0.0338329	-0.767641
ENSG00000128815.19	WDFY4	0.931679	9.14324	3.38932	0.000894537	0.0338538	-0.770097
ENSG00000198597.8	ZNF536	-0.597047	11.7941	-3.3873	0.000900682	0.0339978	-0.780004
ENSG00000171608.15	PIK3CD	0.603905	9.62548	3.38509	0.000907435	0.034164	-0.78303
ENSG00000123892.11	RAB38	1.18278	4.43398	3.39309	0.000883189	0.0338329	-0.785392
ENSG00000173890.16	GPR160	0.920986	6.90199	3.38241	0.000915686	0.03442	-0.797854
ENSG00000255980.1	AP000439.1	1.57472	5.02747	3.38583	0.000905176	0.0341231	-0.797939
ENSG00000170458.13	CD14	1.07722	10.9822	3.38168	0.000917952	0.0344262	-0.798906
ENSG00000123329.17	ARHGAP9	0.787123	9.12575	3.3786	0.000927577	0.0346886	-0.801833
ENSG00000214534.5	ZNF705E	-1.06638	3.22609	-3.41169	0.00082911	0.032521	-0.802592
ENSG00000163694.14	RBM47	0.863951	7.89455	3.37771	0.000930348	0.0346886	-0.806899
ENSG00000254838.5	GVINP1	0.941711	6.56294	3.37861	0.000927549	0.0346886	-0.811495
ENSG00000260578.1	CTD-2541J13.1	-0.617197	7.3036	-3.37413	0.000941658	0.0349528	-0.828614
ENSG00000110934.10	BIN2	0.814438	9.01479	3.36841	0.000960008	0.0352751	-0.831559
ENSG00000110324.10	IL10RA	0.778994	10.0098	3.36757	0.00096274	0.0352863	-0.836382
ENSG00000156869.12	FRRS1	1.28976	4.42769	3.37542	0.000937594	0.034848	-0.836785
ENSG00000100122.5	CRYBB1	1.2131	5.01209	3.37203	0.000948372	0.0349528	-0.842241
ENSG00000106852.15	LHX6	1.0296	7.03369	3.36627	0.000966982	0.0353872	-0.843955
ENSG00000130755.12	GMFG	0.626852	8.82887	3.36424	0.000973605	0.0353872	-0.84425
ENSG00000223799.1	IL10RB-AS1	0.596418	5.03329	3.36786	0.000961807	0.0352863	-0.858954
ENSG00000014257.15	ACPP	1.34775	4.78111	3.36469	0.000972134	0.0353872	-0.864435
ENSG00000226833.5	AC097724.3	-0.622609	6.0267	-3.36438	0.000973143	0.0353872	-0.869635
ENSG00000162949.16	CAPN13	-0.641818	7.4835	-3.35891	0.000991213	0.0356243	-0.872213
ENSG00000126460.10	PRRG2	0.613444	4.42489	3.36589	0.000968221	0.0353872	-0.87281
ENSG00000136943.10	CTSV	-0.982693	8.42142	-3.35379	0.00100842	0.0359629	-0.883104
ENSG00000237938.5	RP11-288I21.1	0.896114	3.81574	3.35701	0.000997591	0.0356843	-0.904232
ENSG00000141968.7	VAV1	0.777479	8.86206	3.33943	0.00105821	0.0368346	-0.916924
ENSG00000138180.15	CEP55	1.41498	4.10634	3.3491	0.00102446	0.0363565	-0.917345
ENSG00000107562.16	CXCL12	0.759214	9.86266	3.33803	0.0010632	0.0368348	-0.922368
ENSG00000070190.12	DAPP1	1.02113	6.49905	3.34002	0.00105613	0.0368346	-0.925069
ENSG00000267014.5	LINC01532	-0.734348	8.7186	-3.33766	0.00106452	0.0368348	-0.927301
ENSG00000114349.9	GNAT1	-0.849298	3.36393	-3.36397	0.000974481	0.0353872	-0.936814
ENSG00000164122.8	ASB5	-1.44795	7.52577	-3.33566	0.00107164	0.0369117	-0.946853
ENSG00000212125.2	TAS2R15P	-0.797767	5.34244	-3.33966	0.00105739	0.0368346	-0.953869
ENSG00000276846.1	CTD-3220F14.3	-0.673568	5.57708	-3.33748	0.00106516	0.0368348	-0.955952
ENSG00000226791.6	AC109826.1	0.950496	5.89046	3.32906	0.00109556	0.0373738	-0.962215
ENSG00000060558.3	GNA15	0.866573	7.71999	3.3235	0.00111611	0.0378218	-0.966584
ENSG00000238217.5	LINC01877	-0.868008	7.70783	-3.3267	0.00110424	0.0375797	-0.967047
ENSG00000279133.1	RP11-342K2.1	-0.757901	5.56607	-3.33304	0.00108109	0.037098	-0.969747
ENSG00000196664.4	TLR7	1.07911	8.3386	3.32143	0.00112385	0.0379381	-0.970054
ENSG00000121933.18	TMIGD3	1.05108	8.87193	3.32049	0.00112737	0.0379687	-0.972856
ENSG00000181284.2	TMEM102	0.650449	6.01517	3.32579	0.0011076	0.0376079	-0.972975
ENSG00000117009.11	KMO	1.25181	4.13764	3.3291	0.00109544	0.0373738	-0.977699
ENSG00000246022.2	ALDH1L1-AS2	-0.601608	7.31481	-3.32083	0.0011261	0.0379687	-0.985383
ENSG00000160691.18	SHC1	0.608924	10.1276	3.31594	0.00114462	0.0382692	-0.987454
ENSG00000023892.10	DEF6	0.625344	9.54925	3.31486	0.00114872	0.0382692	-0.988664
ENSG00000160883.10	HK3	1.09924	6.34834	3.31692	0.00114086	0.0382568	-0.992957
ENSG00000158710.14	TAGLN2	0.615356	12.4826	3.31525	0.00114723	0.0382692	-0.998353
ENSG00000172020.12	GAP43	1.09671	10.7155	3.31088	0.00116405	0.0385527	-1.00543
ENSG00000213719.8	CLIC1	0.640432	11.3825	3.31074	0.00116461	0.0385527	-1.00725
ENSG00000111679.16	PTPN6	0.722097	9.60391	3.30766	0.00117659	0.0387727	-1.01
ENSG00000010671.15	BTK	0.913324	8.8999	3.30686	0.00117971	0.0388317	-1.01152
ENSG00000162493.16	PDPN	0.805159	9.87183	3.30534	0.00118571	0.0389365	-1.01782
ENSG00000148123.14	PLPPR1	-0.603225	10.3143	-3.3047	0.00118826	0.0389365	-1.01789
ENSG00000245848.2	CEBPA	0.963282	8.5172	3.30284	0.00119562	0.0391338	-1.02362
ENSG00000162444.11	RBP7	-0.644975	9.63168	-3.30067	0.00120424	0.0393273	-1.03041
ENSG00000281333.1	RP11-900F13.3	-0.975148	1.66401	-3.37189	0.00094883	0.0349528	-1.03764
ENSG00000118322.12	ATP10B	-0.81265	11.4696	-3.29841	0.00121331	0.0394879	-1.03854
ENSG00000082074.15	FYB	0.879646	10.5217	3.29673	0.00122012	0.0394879	-1.04526
ENSG00000249808.2	LINC01377	-1.43295	3.28246	-3.3355	0.00107225	0.0369117	-1.0479
ENSG00000129450.8	SIGLEC9	1.21366	7.21668	3.29332	0.00123398	0.0394879	-1.05557
ENSG00000137393.9	RNF144B	0.642928	9.81235	3.29208	0.00123906	0.0395661	-1.05566
ENSG00000173442.12	EHBP1L1	0.636134	10.6548	3.29105	0.0012433	0.0396232	-1.06145
ENSG00000145808.9	ADAMTS19	-0.859249	6.4852	-3.29482	0.00122788	0.0394879	-1.07178
ENSG00000239219.2	RP11-379K17.4	-0.93079	3.57775	-3.31381	0.00115275	0.0383349	-1.07625
ENSG00000267787.5	RP11-35G9.5	0.618362	4.96997	3.28861	0.00125338	0.0396506	-1.09274
ENSG00000139178.10	C1RL	0.668458	8.59161	3.27851	0.00129597	0.0405462	-1.09412
ENSG00000233221.6	AC133785.1	-0.859882	5.90518	-3.28854	0.00125371	0.0396506	-1.0969
ENSG00000265743.1	RP11-848P1.3	1.01211	3.95397	3.29061	0.00124511	0.0396325	-1.09729
ENSG00000180071.19	ANKRD18A	-0.751323	9.5717	-3.27579	0.00130767	0.040563	-1.10277
ENSG00000102854.15	MSLN	1.33258	5.89675	3.27752	0.00130022	0.040563	-1.10929
ENSG00000234232.7	RP11-353N4.5	1.48824	3.07895	3.28927	0.00125067	0.0396506	-1.10984
ENSG00000164946.19	FREM1	-0.683911	8.68218	-3.27422	0.00131448	0.0406024	-1.1115
ENSG00000147255.18	IGSF1	-0.702812	9.10294	-3.27318	0.00131899	0.0406538	-1.11196
ENSG00000186854.10	TRABD2A	0.669446	6.07218	3.27177	0.00132516	0.0407143	-1.12961
ENSG00000271820.1	RP5-894D12.5	0.598865	0.273576	3.34591	0.00104341	0.0366085	-1.13209
ENSG00000206532.2	RP11-553A10.1	-1.00553	4.1662	-3.28664	0.00126162	0.0397712	-1.14029
ENSG00000166928.10	MS4A14	1.10228	8.14347	3.26249	0.00136632	0.0413668	-1.14054
ENSG00000071539.13	TRIP13	0.695316	4.9158	3.27194	0.0013244	0.0407143	-1.14122
ENSG00000124212.5	PTGIS	0.96234	6.4867	3.26534	0.00135354	0.0412374	-1.14255
ENSG00000249035.6	CTB-113P19.1	-0.940847	2.87332	-3.29934	0.00120958	0.0394574	-1.15211
ENSG00000171772.15	SYCE1	-0.944759	7.79413	-3.26005	0.00137734	0.041503	-1.16046
ENSG00000124496.12	TRERF1	0.605562	8.12084	3.25464	0.00140206	0.042007	-1.16471
ENSG00000161640.15	SIGLEC11	1.19591	5.30364	3.26059	0.00137489	0.0414964	-1.16517
ENSG00000038945.14	MSR1	1.04983	9.54827	3.24836	0.00143127	0.0424922	-1.18145
ENSG00000245975.2	RP11-30K9.6	-0.642567	6.85449	-3.25356	0.00140707	0.0420312	-1.18504
ENSG00000012779.10	ALOX5	0.825346	9.90375	3.24702	0.00143761	0.0425486	-1.18578
ENSG00000185669.5	SNAI3	0.667901	6.64252	3.24866	0.00142989	0.0424922	-1.19103
ENSG00000112818.9	MEP1A	1.65339	3.25555	3.25436	0.00140337	0.042007	-1.20528
ENSG00000203897.3	SPATA42	-1.03022	0.976086	-3.29007	0.00125269	0.0396506	-1.20758
ENSG00000203756.7	TMEM244	-1.1263	2.90947	-3.28416	0.00127201	0.0400119	-1.21083
ENSG00000141526.16	SLC16A3	0.770788	10.2771	3.23747	0.00148332	0.0433729	-1.2143
ENSG00000183765.20	CHEK2	0.697219	7.12509	3.23821	0.00147972	0.043355	-1.217
ENSG00000181885.18	CLDN7	1.0285	5.46846	3.24198	0.00146157	0.042953	-1.21816
ENSG00000261795.1	RP11-90P13.1	1.15945	6.22916	3.23315	0.00150443	0.0436391	-1.23613
ENSG00000171860.4	C3AR1	0.985387	9.55537	3.22753	0.0015323	0.0442267	-1.24043
ENSG00000259953.1	RP11-4O1.2	0.879497	6.91682	3.22927	0.00152362	0.0440636	-1.24306
ENSG00000235568.6	NFAM1	0.646351	8.61557	3.22437	0.00154824	0.0445644	-1.24869
ENSG00000240405.5	SAMMSON	-1.01671	3.91903	-3.24852	0.00143051	0.0424922	-1.25814
ENSG00000000938.12	FGR	0.812202	9.64037	3.21414	0.00160071	0.0455191	-1.27844
ENSG00000129465.15	RIPK3	0.741838	6.85154	3.21518	0.00159531	0.0454746	-1.28435
ENSG00000166145.14	SPINT1	0.881866	6.59109	3.21247	0.00160944	0.0455982	-1.29336
ENSG00000073754.5	CD5L	1.71853	2.00351	3.23371	0.00150166	0.0436022	-1.29389
ENSG00000188921.13	HACD4	0.699119	8.60298	3.20825	0.00163173	0.0458505	-1.29431
ENSG00000105246.5	EBI3	0.872325	7.4096	3.20926	0.00162633	0.0457748	-1.29633
ENSG00000125257.13	ABCC4	0.645715	9.23716	3.20715	0.00163757	0.0459419	-1.29642
ENSG00000116771.5	AGMAT	0.941146	4.56684	3.21734	0.00158412	0.0452729	-1.30091
ENSG00000182718.16	ANXA2	0.676726	12.1205	3.20481	0.00165006	0.04607	-1.31441
ENSG00000106565.17	TMEM176B	0.698155	10.8812	3.2015	0.00166791	0.0463902	-1.31833
ENSG00000120708.16	TGFBI	0.909658	9.94082	3.19827	0.00168549	0.0467794	-1.32451
ENSG00000100092.20	SH3BP1	0.594823	8.53999	3.19603	0.00169779	0.0467794	-1.32923
ENSG00000173068.17	BNC2	0.736552	7.5137	3.19641	0.0016957	0.0467794	-1.3329
ENSG00000165304.7	MELK	1.53975	3.06224	3.20982	0.00162338	0.0457649	-1.33764
ENSG00000138336.8	TET1	-0.587484	7.53563	-3.19214	0.00171931	0.0471875	-1.35341
ENSG00000112799.8	LY86	0.920135	9.26816	3.18703	0.00174798	0.0476149	-1.35356
ENSG00000196209.12	SIRPB2	0.994949	7.87988	3.18774	0.00174402	0.0476149	-1.354
ENSG00000101096.19	NFATC2	0.588669	8.89019	3.18621	0.00175267	0.0476277	-1.35548
ENSG00000170909.13	OSCAR	0.863441	7.82847	3.18706	0.00174785	0.0476149	-1.35652
ENSG00000170571.11	EMB	0.64956	8.74354	3.18279	0.00177217	0.0478604	-1.36553
ENSG00000185272.13	RBM11	-0.684786	10.2873	-3.18186	0.00177746	0.0478604	-1.36714
ENSG00000124549.14	BTN2A3P	0.688284	5.8337	3.18807	0.00174213	0.0476149	-1.37072
ENSG00000086730.16	LAT2	0.84273	10.2721	3.18141	0.00178005	0.0478604	-1.37282
ENSG00000204257.14	HLA-DMA	0.760362	10.9478	3.18148	0.00177969	0.0478604	-1.37518
ENSG00000152527.13	PLEKHH2	-0.599037	9.54641	-3.17865	0.00179601	0.0480674	-1.37796
ENSG00000185614.4	FAM212A	0.637019	7.02472	3.18164	0.00177878	0.0478604	-1.3787
ENSG00000223749.9	MIR503HG	0.903767	5.59781	3.18442	0.00176283	0.0477953	-1.38145
ENSG00000066294.14	CD84	0.927288	9.29752	3.17403	0.00182301	0.0484774	-1.39006
ENSG00000101916.11	TLR8	1.2292	5.52745	3.18057	0.00178492	0.0479027	-1.39088
ENSG00000225194.2	LINC00092	-0.638874	8.46196	-3.1757	0.00181322	0.0483498	-1.39247
ENSG00000166927.12	MS4A7	0.950233	9.59113	3.16823	0.00185744	0.048708	-1.40757
ENSG00000137841.11	PLCB2	0.877155	11.1653	3.16934	0.00185077	0.048708	-1.41057
ENSG00000187867.8	PALM3	0.685219	7.55319	3.16805	0.0018585	0.048708	-1.41226
ENSG00000261604.1	CTD-2636A23.2	-0.871182	7.07799	-3.17354	0.0018259	0.0485098	-1.41251
ENSG00000172123.12	SLFN12	0.617567	6.49938	3.17079	0.00184219	0.048708	-1.41354
ENSG00000039537.13	C6	1.58825	2.75326	3.18551	0.00175663	0.0476718	-1.41356
ENSG00000178695.5	KCTD12	0.675376	12.6933	3.17025	0.00184539	0.048708	-1.41411
ENSG00000099250.17	NRP1	0.63041	9.82737	3.16565	0.00187291	0.0488654	-1.41441
ENSG00000259744.1	RP11-138H8.6	-1.05848	4.70668	-3.18661	0.00175039	0.0476277	-1.41586
ENSG00000273265.1	RP11-353K11.1	-0.801723	4.85618	-3.18323	0.00176963	0.0478458	-1.41648
ENSG00000130270.16	ATP8B3	0.794435	5.88192	3.17013	0.00184609	0.048708	-1.41989
ENSG00000283462.1	CTC-445B21.1	-0.749304	9.42365	-3.16404	0.00188266	0.0489014	-1.42008
ENSG00000271239.1	RP11-238F2.1	-1.02932	2.79149	-3.21244	0.00160962	0.0455982	-1.42129
ENSG00000166106.3	ADAMTS15	0.985744	6.13529	3.16651	0.00186772	0.0488178	-1.42591
ENSG00000260633.1	RP11-375I20.6	-0.952008	5.01088	-3.17573	0.00181307	0.0483498	-1.43776
ENSG00000145779.7	TNFAIP8	0.660092	7.98112	3.1569	0.00192641	0.0495416	-1.44102
ENSG00000179761.11	PIPOX	-0.630576	8.36151	-3.15789	0.00192031	0.0495243	-1.44332
ENSG00000111816.7	FRK	-0.66472	8.81195	-3.15414	0.00194354	0.0496825	-1.45069
ENSG00000222043.2	AC079305.10	-0.949916	2.45892	-3.20619	0.00164267	0.0459964	-1.45375
ENSG00000259462.2	CPEB1-AS1	-0.673329	7.84364	-3.1547	0.00194008	0.0496807	-1.45668
ENSG00000185905.3	C16orf54	0.918281	5.15843	3.15667	0.0019278	0.0495416	-1.46525
ENSG00000280202.1	RP5-1180D12.1	1.00584	3.77469	3.15539	0.00193581	0.0496595	-1.48767
ENSG00000180061.9	TMEM150B	1.18252	3.34713	3.15728	0.00192405	0.0495327	-1.48891
ENSG00000279344.1	RP11-44F14.7	-0.858594	4.34124	-3.15825	0.00191807	0.0495105	-1.49973
ENSG00000264151.5	RP11-739N10.1	0.709358	0.404379	3.19721	0.00169782	0.0467794	-1.55923
ENSG00000280268.1	RP11-147K16.3	-1.13717	2.45928	-3.16437	0.00188064	0.0489014	-1.59163
ENSG00000196970.8	NXF4	-1.02519	2.28816	-3.15457	0.00194087	0.0496807	-1.63202

## Sheet: Esophagus - Mucosa
ESID	ID	logFC	AveExpr	t	P.Value	adj.P.Val	B
ENSG00000278897.1	AC020951.1	-0.844357	4.3033	-4.96844	9.06358e-07	0.0263433	5.17387

## Sheet: Esophagus - Muscularis
ESID	ID	logFC	AveExpr	t	P.Value	adj.P.Val	B
ENSG00000174482.10	LINGO2	-0.897873	3.84877	-4.94133	1.05781e-06	0.0307451	4.72543
ENSG00000186960.10	LINC01551	-1.19979	3.73075	-4.75327	2.61553e-06	0.0380102	4.01639

## Sheet: Heart - Atrial Appendage
ESID	ID	logFC	AveExpr	t	P.Value	adj.P.Val	B
ENSG00000228232.1	GAPDHP1	-0.743958	6.7905	-5.09538	5.26599e-07	0.0153056	5.48288
ENSG00000224520.2	KRT8P45	-1.0813	3.42901	-4.87845	1.51931e-06	0.0220794	4.80598
ENSG00000234743.1	EIF5AP4	-0.69197	2.17665	-4.69061	3.68766e-06	0.0330628	4.08174
ENSG00000234825.3	XRCC6P2	-0.679395	3.92909	-4.62659	4.95631e-06	0.0330628	3.70992

## Sheet: Liver
ESID	ID	logFC	AveExpr	t	P.Value	adj.P.Val	B
ENSG00000136943.10	CTSV	-1.7664	2.98556	-5.54913	8.32918e-08	0.00121044	7.30045

## Sheet: Muscle - Skeletal
ESID	ID	logFC	AveExpr	t	P.Value	adj.P.Val	B
ENSG00000205056.8	RP11-693J15.5	0.76646	6.39123	4.64244	4.03732e-06	0.0309534	3.77048
ENSG00000258647.5	LINC00930	0.784678	6.12005	4.53411	6.69081e-06	0.0354884	3.33914

[truncated: 4 more sheets: Prostate, Skin - Sun Exposed (Lower leg), Spleen, Whole Blood]
