# Supplementary material for: Exploring the Impact of Cerebrovascular Disease and Major Depression on Non-diseased Human Tissue Transcriptomes
Source: Front Genet. 2021 Jul 19;12:696836. doi: 10.3389/fgene.2021.696836 (PMC8327210; doi:10.3389/fgene.2021.696836)
Supplement: Supplementary Table 2 — Significantly differentially expressed genes in MD analysis. All limma-voom differential expression results, including limma reports, MA plots, and volcano plots, can be found at: https://doi.org/10.5281/zenodo.5075921. [file Table_2.XLSX]

## Sheet: Artery - Tibial
Table S2. Limma result table of significant MD differential expression genes (FDR < 0.05 and log2FC > 1.5)
ESID	ID	logFC	AveExpr	t	P.Value	adj.P.Val	B
ENSG00000265185.5	SNORD3B-1	-0.869623	2.02845	-5.11224	4.2123e-07	0.0122422	5.28902

## Sheet: Brain - Anterior cingulate cort
ESID	ID	logFC	AveExpr	t	P.Value	adj.P.Val	B
ENSG00000139985.6	ADAM21	-1.64578	4.35527	-5.27705	4.00855e-07	0.00944594	5.29358
ENSG00000274993.1	RP11-395B7.2	-1.52911	2.51208	-5.17303	6.50032e-07	0.00944594	5.25305

## Sheet: Brain - Cerebellar Hemisphere
ESID	ID	logFC	AveExpr	t	P.Value	adj.P.Val	B
ENSG00000106331.15	PAX4	0.721097	0.195383	4.95985	1.49466e-06	0.0246366	4.25399
ENSG00000280362.1	RP11-643A5.3	-1.8096	2.8254	-4.90467	1.89224e-06	0.0246366	3.93563
ENSG00000281571.2	CH17-195P21.2	-1.14978	3.1359	-4.83956	2.54309e-06	0.0246366	3.49925

## Sheet: Brain - Frontal Cortex (BA9)
ESID	ID	logFC	AveExpr	t	P.Value	adj.P.Val	B
ENSG00000254242.1	RP11-1080G15.2	0.602769	0.120449	5.24789	4.09091e-07	0.0118894	6.12369

## Sheet: Brain - Hypothalamus
ESID	ID	logFC	AveExpr	t	P.Value	adj.P.Val	B
ENSG00000249885.1	ARHGEF38-IT1	0.778688	0.108585	5.52262	1.40161e-07	0.00362141	7.14185
ENSG00000150672.16	DLG2	-0.601601	12.6697	-5.34769	2.49211e-07	0.00362141	6.34348
ENSG00000232780.2	GAPDHP74	-1.74217	2.90401	-5.01434	1.19716e-06	0.00869828	5.15665
ENSG00000145390.11	USP53	0.622151	10.4231	5.01537	1.19153e-06	0.00869828	4.9663
ENSG00000110881.11	ASIC1	-0.636165	11.9586	-4.96289	1.51573e-06	0.00881034	4.75563
ENSG00000258820.5	RP11-293M10.2	0.692646	0.199365	4.84481	2.61482e-06	0.0118575	4.45171
ENSG00000279539.1	AC006486.10	-1.11591	3.80904	-4.75907	3.79395e-06	0.0118575	4.06802
ENSG00000177692.11	DNAJC28	-0.616446	7.30458	-4.77345	3.55939e-06	0.0118575	4.05386
ENSG00000183780.12	SLC35F3	-0.808649	8.86638	-4.74266	4.07993e-06	0.0118575	3.91545
ENSG00000255136.2	CTD-2562J17.4	-1.21084	4.37074	-4.54418	9.68633e-06	0.020052	3.22142
ENSG00000203809.6	LIN28B-AS1	-1.04578	4.46061	-4.52278	1.06156e-05	0.020052	3.13479
ENSG00000178235.7	SLITRK1	-0.64841	10.0046	-4.53018	1.02849e-05	0.020052	3.09499
ENSG00000269793.5	ZIM2-AS1	-0.622334	7.33995	-4.46608	1.3511e-05	0.0202463	2.88239
ENSG00000204054.13	LINC00963	0.590886	10.5424	4.45882	1.39327e-05	0.0202463	2.82381
ENSG00000169169.14	CPT1C	-0.60612	11.6277	-4.41697	1.66205e-05	0.0219565	2.67071
ENSG00000156313.12	RPGR	0.749983	9.96045	4.38167	1.92688e-05	0.0240176	2.54388
ENSG00000248587.7	GDNF-AS1	-1.07362	6.43824	-4.33014	2.38719e-05	0.0269449	2.39531
ENSG00000119283.15	TRIM67	-0.697037	9.07219	-4.32779	2.41051e-05	0.0269449	2.36133
ENSG00000143382.14	ADAMTSL4	1.09121	7.9901	4.31738	2.51651e-05	0.0270879	2.32133
ENSG00000271967.1	RP11-134K13.4	-0.639321	5.93196	-4.23121	3.58282e-05	0.0297507	2.03998
ENSG00000070601.9	FRMPD1	-0.646239	7.86396	-4.16009	4.77658e-05	0.0330528	1.77467
ENSG00000272734.1	ADIRF-AS1	0.745776	6.90303	4.14345	5.10635e-05	0.034513	1.71532
ENSG00000162630.5	B3GALT2	-0.695176	9.59834	-4.13226	5.34026e-05	0.0352736	1.66737
ENSG00000174469.19	CNTNAP2	-0.742733	12.2036	-4.1174	5.66674e-05	0.0358923	1.60941
ENSG00000273618.1	RP11-66N24.7	-0.825905	5.35246	-4.10309	5.99903e-05	0.0363228	1.59304
ENSG00000058335.15	RASGRF1	-0.748228	11.5277	-4.07949	6.58786e-05	0.037555	1.47958
ENSG00000162365.11	CYP4A22	-1.23867	4.43936	-4.0625	7.04562e-05	0.037555	1.45897
ENSG00000270866.1	RP11-706J10.2	-0.928684	8.07727	-4.06615	6.9447e-05	0.037555	1.44914
ENSG00000053702.14	NRIP2	-0.605863	9.89999	-4.06931	6.85862e-05	0.037555	1.44896
ENSG00000153563.15	CD8A	-0.659389	8.28343	-4.06671	6.92947e-05	0.037555	1.44876
ENSG00000196754.10	S100A2	1.01878	5.29729	4.0603	7.10706e-05	0.037555	1.4357
ENSG00000169783.12	LINGO1	-0.638617	11.7024	-4.02659	8.11472e-05	0.0385388	1.29939
ENSG00000204176.13	SYT15	-0.801031	6.73569	-4.01449	8.5087e-05	0.0386388	1.27959
ENSG00000105855.9	ITGB8	0.673004	11.8411	4.01917	8.35407e-05	0.0385388	1.27799
ENSG00000089169.14	RPH3A	-0.777398	12.2016	-4.00579	8.80312e-05	0.0393608	1.22965
ENSG00000171124.12	FUT3	1.6738	3.07212	3.97321	9.99393e-05	0.0420947	1.14658
ENSG00000280134.1	RP11-113E21.3	-0.885841	4.80177	-3.95769	0.000106133	0.0421379	1.09503
ENSG00000079841.18	RIMS1	-0.88898	10.688	-3.95142	0.000108741	0.0421379	1.04945
ENSG00000225675.2	LINC01771	-1.14941	5.13189	-3.93847	0.000114317	0.0431479	1.02984
ENSG00000253457.2	SMIM18	-0.9829	8.09998	-3.90697	0.000129037	0.0459047	0.911922
ENSG00000204520.12	MICA	0.730052	8.3684	3.90382	0.000130602	0.0459047	0.894802
ENSG00000196344.11	ADH7	1.05691	0.513131	3.89839	0.000133347	0.0459047	0.88333
ENSG00000136457.9	CHAD	-1.02996	8.11196	-3.89713	0.000133989	0.0459047	0.879225
ENSG00000166897.14	ELFN2	-0.732149	11.538	-3.89942	0.000132821	0.0459047	0.875667
ENSG00000221870.2	TMEM257	-0.634011	7.8568	-3.89313	0.000136054	0.0459047	0.865754
ENSG00000184984.9	CHRM5	-1.22965	8.29066	-3.89283	0.000136213	0.0459047	0.864826
ENSG00000171940.13	ZNF217	0.619471	8.7247	3.89053	0.000137416	0.0459047	0.850082
ENSG00000213023.10	SYT3	-0.853248	10.2019	-3.88668	0.000139449	0.0460365	0.836614
ENSG00000279910.1	RP11-113E21.2	-1.06857	5.34769	-3.878	0.000144146	0.0460365	0.825591
ENSG00000180287.16	PLD5	-0.653521	9.2321	-3.88223	0.000141842	0.0460365	0.824607
ENSG00000282164.2	PEG13	-0.906591	9.48106	-3.87839	0.000143935	0.0460365	0.812057
ENSG00000185666.14	SYN3	-0.654667	7.82448	-3.87091	0.000148091	0.046418	0.792752
ENSG00000157851.16	DPYSL5	-0.598939	12.5929	-3.84118	0.000165784	0.0496719	0.686716

## Sheet: Brain - Nucleus accumbens (basa
ESID	ID	logFC	AveExpr	t	P.Value	adj.P.Val	B
ENSG00000054796.12	SPO11	0.659127	0.12839	5.15574	5.53046e-07	0.00340648	5.64995
ENSG00000165583.14	SSX5	1.04834	0.152611	4.40312	1.77457e-05	0.0396726	2.56546
ENSG00000254973.1	RP11-429J17.7	-1.39657	3.67948	-4.33153	2.18435e-05	0.0423225	2.30667

## Sheet: Brain - Putamen (basal ganglia)
ESID	ID	logFC	AveExpr	t	P.Value	adj.P.Val	B
ENSG00000170688.4	OR5E1P	0.590119	0.0397076	6.17365	5.29751e-09	0.000153962	9.71207
ENSG00000196156.4	KRTAP4-3	0.707869	0.0825056	5.70055	5.14289e-08	0.00074734	7.81641
ENSG00000249947.2	XBP1P1	-1.43537	3.30185	-5.46616	1.38272e-07	0.00133953	6.76338
ENSG00000275852.1	LINC01742	0.641074	0.0809003	5.4478	1.88065e-07	0.00136643	6.70541
ENSG00000258646.1	RP11-950C14.3	-1.32983	3.37608	-5.27415	3.49872e-07	0.00203366	5.92168
ENSG00000272263.1	RP11-767C1.2	-1.21768	4.31749	-5.14046	6.58787e-07	0.00243536	5.25641
ENSG00000273007.1	RP11-170N16.3	-0.751939	5.52402	-5.1411	6.56789e-07	0.00243536	5.10837
ENSG00000226306.6	NPY6R	-1.05323	5.27122	-4.76431	3.67349e-06	0.0118625	3.72364
ENSG00000204539.3	CDSN	0.644424	0.153642	4.57551	8.59115e-06	0.0201125	3.31986
ENSG00000272506.1	RP4-535B20.4	-1.22241	3.48923	-4.57469	8.42937e-06	0.0201125	3.17091
ENSG00000272931.1	RP5-943J3.2	-1.23126	4.15863	-4.55488	9.18044e-06	0.0201125	3.05043
ENSG00000277481.1	PKD1L3	-1.42027	2.34566	-4.47527	1.2902e-05	0.0234357	2.94286
ENSG00000226496.2	LINC00323	-1.8204	4.84449	-4.40239	1.75494e-05	0.0268183	2.48927
ENSG00000230534.6	RP11-297A16.2	-1.33285	2.11938	-4.3465	2.21624e-05	0.0283779	2.47049
ENSG00000279019.1	RP11-407G23.2	-1.37807	5.71472	-4.3941	1.81693e-05	0.0268183	2.39014
ENSG00000269553.1	U62631.5	-1.53592	5.45443	-4.36497	2.05221e-05	0.0283779	2.31048
ENSG00000163705.12	FANCD2OS	0.679188	0.193992	4.3041	2.7432e-05	0.033219	2.28751
ENSG00000271833.1	RP11-356B19.11	-1.03925	4.56212	-4.34331	2.24578e-05	0.0283779	2.26265
ENSG00000273523.1	RP11-248G5.9	-1.34945	3.35944	-4.24276	3.39787e-05	0.0356677	1.99756
ENSG00000272180.1	RP11-481J13.1	-1.36379	2.96581	-4.22878	3.59718e-05	0.0356677	1.9913
ENSG00000266993.3	RP4-657D16.3	-1.21337	3.78747	-4.2375	3.47157e-05	0.0356677	1.94718
ENSG00000267546.2	RP11-666A8.8	-1.16408	3.29027	-4.22307	3.68177e-05	0.0356677	1.9305
ENSG00000129965.13	INS-IGF2	-1.5493	2.44507	-4.19836	4.07014e-05	0.0381508	1.92851
ENSG00000187481.2	HSD3BP1	0.679192	0.177214	4.18559	4.32944e-05	0.0381508	1.88606
ENSG00000131738.10	KRT33B	1.20773	0.478571	4.18588	4.33337e-05	0.0381508	1.84649
ENSG00000271382.1	RP11-1060G2.2	-1.21303	3.38305	-4.15168	4.91353e-05	0.0396672	1.67941
ENSG00000233725.7	LINC00284	-1.00868	4.7551	-4.14436	5.05989e-05	0.0396696	1.57072
ENSG00000231784.8	DBIL5P	0.774636	5.82641	4.17035	4.55791e-05	0.0381508	1.56181

## Sheet: Brain - Spinal cord (cervical c
ESID	ID	logFC	AveExpr	t	P.Value	adj.P.Val	B
ENSG00000181995.11	LINC00301	0.838106	0.0851345	7.05193	1.42261e-10	2.06727e-06	12.3222
ENSG00000267337.1	LINC01478	0.961304	0.0147899	8.13005	2.57757e-12	7.4912e-08	11.664
ENSG00000250930.5	LNX1-AS1	0.632275	0.0248176	6.41964	6.79705e-09	6.58475e-05	7.93229
ENSG00000261683.1	LINC00838	0.703487	0.0415347	5.70909	1.1532e-07	0.000837889	6.09116
ENSG00000258538.5	RP11-753D20.3	0.588209	0.0590997	5.29017	6.48236e-07	0.00313995	5.33059
ENSG00000253781.1	ZNF317P1	0.671209	0.061264	5.1853	1.00661e-06	0.0041793	4.76362
ENSG00000280300.1	RP11-338K17.10	-1.35423	2.51768	-4.8536	2.98508e-06	0.0107486	3.99837
ENSG00000236496.2	GPS2P1	-2.27369	3.31701	-4.8286	3.32854e-06	0.0107486	3.88403
ENSG00000219926.10	RP11-394A14.2	0.762712	0.167448	4.67844	7.07899e-06	0.0205737	3.33508
ENSG00000256321.5	RP11-153K16.1	0.85003	0.11519	4.66299	8.3596e-06	0.0220868	3.1317
ENSG00000258457.5	RP11-298I3.4	-1.50946	2.50107	-4.48759	1.4161e-05	0.0316586	2.71578
ENSG00000261703.1	LINC02168	0.666488	0.131989	4.38186	2.32691e-05	0.0433155	2.29476
ENSG00000268686.1	AC010524.2	-1.38941	2.87932	-4.36048	2.38464e-05	0.0433155	2.21087
ENSG00000234961.1	RP11-124N14.3	-1.51207	2.30733	-4.30219	3.01786e-05	0.0487267	2.08087

## Sheet: Brain - Substantia nigra
ESID	ID	logFC	AveExpr	t	P.Value	adj.P.Val	B
ENSG00000206072.12	SERPINB11	0.819963	0.0753315	5.46335	4.91339e-07	0.0142798	-0.441882

## Sheet: Esophagus - Gastroesophageal Ju
ESID	ID	logFC	AveExpr	t	P.Value	adj.P.Val	B
ENSG00000271973.1	RP11-572O6.1	-0.614537	2.96977	-4.97473	1.00847e-06	0.0293091	5.00208
ENSG00000237975.6	FLG-AS1	-0.65578	7.01178	-4.4936	9.41538e-06	0.0390913	2.83927

[truncated: 6 more sheets: Pancreas, Pituitary, Small Intestine - Terminal Ileu, Uterus, Vagina, Whole Blood]
