# Supplementary material for: Exploring the Impact of Cerebrovascular Disease and Major Depression on Non-diseased Human Tissue Transcriptomes
Source: Front Genet. 2021 Jul 19;12:696836. doi: 10.3389/fgene.2021.696836 (PMC8327210; doi:10.3389/fgene.2021.696836)
Supplement: Supplementary Table 3 — Significant TWAS associations. [file Table_3.XLSX]

## Sheet: CRP
Table S3. S-PrediXcan result table of significant gene-tissue pairs (P-value < 0.5/number of genes)
gene	gene_name	zscore	effect_size	pvalue	var_g	pred_perf_r2	pred_perf_pval	pred_perf_qval	n_snps_used	n_snps_in_cov	n_snps_in_model	type
ENSG00000116678.19	LEPR	-30.8581	-0.427177	4.35872e-209	0.0106279	0.113863	8.46133e-12	#N/A	16	16	16	Adipose_Visceral_Omentum
ENSG00000157837.15	SPPL3	29.7982	0.393933	4.12323e-195	0.0129598	0.129368	1.84217e-13	#N/A	12	12	12	Adipose_Visceral_Omentum
ENSG00000163239.12	TDRD10	-22.2625	-0.194948	8.54145e-110	0.027229	0.287687	2.75971e-31	#N/A	26	26	26	Adipose_Visceral_Omentum
ENSG00000115216.13	NRBP1	21.7663	0.418918	4.84536e-105	0.00584218	0.0994781	1.49101e-10	#N/A	15	15	15	Adipose_Visceral_Omentum
ENSG00000135124.14	P2RX4	-19.4415	-0.253617	3.43897e-84	0.0117052	0.128385	3.34646e-13	#N/A	12	13	13	Adipose_Visceral_Omentum
ENSG00000115241.10	PPM1G	17.8381	1.12027	3.57519e-71	0.000545813	0.0171695	0.0104768	#N/A	23	23	23	Adipose_Visceral_Omentum
ENSG00000130208.9	APOC1	16.8664	0.19703	7.95437e-64	0.0156872	0.0197839	0.0061303	#N/A	39	39	39	Adipose_Visceral_Omentum
ENSG00000157895.11	C12orf43	14.7638	0.100644	2.50772e-49	0.0487817	0.28499	2.26536e-31	#N/A	27	36	36	Adipose_Visceral_Omentum
ENSG00000157992.12	KRTCAP3	-14.6785	-0.220441	8.85908e-49	0.00924425	0.0536246	4.88359e-06	#N/A	32	32	32	Adipose_Visceral_Omentum
ENSG00000186567.12	CEACAM19	-14.5693	-0.133883	4.40229e-48	0.0229356	0.237284	5.94739e-25	#N/A	24	24	24	Adipose_Visceral_Omentum
ENSG00000175970.10	UNC119B	-13.6169	-0.965692	3.17913e-42	0.000397034	0.021041	0.00448637	#N/A	10	10	10	Adipose_Visceral_Omentum
ENSG00000163568.14	AIM2	13.3484	0.184192	1.20945e-40	0.010652	0.0561915	1.66139e-06	#N/A	30	33	33	Adipose_Visceral_Omentum
ENSG00000237541.3	HLA-DQA2	13.0922	0.0292218	3.6478e-39	0.37031	0.659129	6.69021e-108	#N/A	28	29	29	Adipose_Visceral_Omentum
ENSG00000184949.15	FAM227A	-11.9075	-0.278437	1.08112e-32	0.00379538	0.0473614	1.44979e-05	#N/A	14	14	14	Adipose_Visceral_Omentum
ENSG00000117090.14	SLAMF1	-11.5395	-0.202647	8.34293e-31	0.00559749	0.0105442	0.0447709	#N/A	28	29	29	Adipose_Visceral_Omentum
ENSG00000090621.13	PABPC4	-11.0981	-0.262663	1.28106e-28	0.00396835	0.118416	2.71821e-12	#N/A	20	20	20	Adipose_Visceral_Omentum
ENSG00000175164.13	ABO	10.9034	0.0412486	1.11031e-27	0.149251	0.584318	1.95008e-84	#N/A	57	58	58	Adipose_Visceral_Omentum
ENSG00000100979.14	PLTP	10.7533	0.161524	5.71889e-27	0.00968437	0.102981	1.14171e-10	#N/A	13	13	13	Adipose_Visceral_Omentum
ENSG00000204314.10	PRRT1	10.5624	0.186443	4.45016e-26	0.00631851	0.0375439	0.000110365	#N/A	46	47	47	Adipose_Visceral_Omentum
ENSG00000196126.11	HLA-DRB1	-10.2922	-0.0736101	7.63842e-25	0.0370392	0.225216	4.69747e-24	#N/A	42	42	42	Adipose_Visceral_Omentum
ENSG00000138074.14	SLC5A6	10.2409	1.08815	1.29985e-24	0.000192457	0.0107507	0.0438529	#N/A	2	2	2	Adipose_Visceral_Omentum
ENSG00000187775.16	DNAH17	-9.74538	-0.167964	1.93063e-22	0.00739401	0.0654538	3.4902e-07	#N/A	15	15	15	Adipose_Visceral_Omentum
ENSG00000089041.16	P2RX7	-9.67354	-0.311183	3.9061e-22	0.0017445	0.0222032	0.00307305	#N/A	9	10	10	Adipose_Visceral_Omentum
ENSG00000266970.1	RP11-806H10.4	9.66395	0.1987	4.28976e-22	0.00573551	0.0369886	0.000114584	#N/A	23	23	23	Adipose_Visceral_Omentum
ENSG00000100211.10	CBY1	9.56719	0.104746	1.09852e-21	0.0174778	0.16454	3.72925e-17	#N/A	66	66	66	Adipose_Visceral_Omentum
ENSG00000240053.8	LY6G5B	-9.49477	-0.102016	2.20692e-21	0.0192942	0.2674	7.43785e-29	#N/A	65	67	67	Adipose_Visceral_Omentum
ENSG00000183682.7	BMP8A	9.4692	0.464661	2.81985e-21	0.000929372	0.0110262	0.0404231	#N/A	3	4	4	Adipose_Visceral_Omentum
ENSG00000134575.9	ACP2	9.38592	0.179682	6.23715e-21	0.00607887	0.0914731	8.19522e-10	#N/A	13	14	14	Adipose_Visceral_Omentum
ENSG00000214787.9	MS4A4E	9.23727	0.535507	2.52857e-20	0.000519633	0.0211517	0.00430711	#N/A	6	6	6	Adipose_Visceral_Omentum
ENSG00000138031.14	ADCY3	9.17284	0.173015	4.60721e-20	0.00604816	0.0889705	1.81436e-09	#N/A	15	15	15	Adipose_Visceral_Omentum
ENSG00000276045.2	ORAI1	9.14285	0.108204	6.0825e-20	0.0108041	0.0501988	1.03369e-05	#N/A	58	67	67	Adipose_Visceral_Omentum
ENSG00000025434.18	NR1H3	-9.13792	-0.341036	6.36651e-20	0.00156561	0.010664	0.0437284	#N/A	6	7	7	Adipose_Visceral_Omentum
ENSG00000172247.3	C1QTNF4	-9.04213	-0.0616535	1.53643e-19	0.0377159	0.191383	6.6458e-20	#N/A	9	9	9	Adipose_Visceral_Omentum
ENSG00000198945.7	L3MBTL3	-9.01005	-0.0676978	2.05959e-19	0.0372641	0.187576	9.06027e-20	#N/A	96	96	96	Adipose_Visceral_Omentum
ENSG00000204525.16	HLA-C	-8.97397	-0.0465593	2.86018e-19	0.0655701	0.275419	2.56711e-30	#N/A	63	65	65	Adipose_Visceral_Omentum
ENSG00000160917.14	CPSF4	8.8155	0.277209	1.19153e-18	0.0022824	0.0648385	4.37381e-07	#N/A	19	19	19	Adipose_Visceral_Omentum
ENSG00000004534.14	RBM6	-8.78484	-0.0421468	1.56592e-18	0.082749	0.530656	5.2761e-72	#N/A	42	43	43	Adipose_Visceral_Omentum
ENSG00000189114.6	BLOC1S3	-8.66355	-0.168525	4.57283e-18	0.00601672	0.0126017	0.0284413	#N/A	27	27	27	Adipose_Visceral_Omentum
ENSG00000111816.7	FRK	8.52965	0.247701	1.46791e-17	0.00217363	0.0327573	0.000355217	#N/A	5	5	5	Adipose_Visceral_Omentum
ENSG00000196502.11	SULT1A1	-8.42599	-0.0653119	3.57714e-17	0.031937	0.100617	1.31171e-10	#N/A	23	24	24	Adipose_Visceral_Omentum
ENSG00000138085.16	ATRAID	-8.41723	-0.119728	3.85502e-17	0.0110258	0.149511	1.69028e-15	#N/A	17	17	17	Adipose_Visceral_Omentum
ENSG00000100201.20	DDX17	-8.39816	-0.145769	4.53536e-17	0.00695505	0.0241113	0.00228559	#N/A	56	56	56	Adipose_Visceral_Omentum
ENSG00000196683.10	TOMM7	8.38747	0.0536291	4.96709e-17	0.0462774	0.386842	1.86499e-45	#N/A	38	38	38	Adipose_Visceral_Omentum
ENSG00000110931.18	CAMKK2	-8.28961	-0.0916446	1.13621e-16	0.0161506	0.0403335	7.30995e-05	#N/A	75	77	77	Adipose_Visceral_Omentum
ENSG00000079459.12	FDFT1	8.21332	0.149986	2.15162e-16	0.00658761	0.0567111	2.32145e-06	#N/A	17	17	17	Adipose_Visceral_Omentum
ENSG00000231852.6	CYP21A2	8.21007	0.0946244	2.21056e-16	0.0161884	0.0741175	5.66035e-08	#N/A	34	35	35	Adipose_Visceral_Omentum
ENSG00000009950.15	MLXIPL	-8.18537	-0.134378	2.71478e-16	0.00758046	0.0951149	4.80778e-10	#N/A	34	35	35	Adipose_Visceral_Omentum
ENSG00000214530.8	STARD10	8.15077	0.0728838	3.61611e-16	0.0250032	0.21019	8.18419e-22	#N/A	18	18	18	Adipose_Visceral_Omentum
ENSG00000241468.7	ATP5J2	8.1336	0.520644	4.16728e-16	0.000498904	0.0300623	0.000695417	#N/A	25	25	25	Adipose_Visceral_Omentum
ENSG00000138092.10	CENPO	8.05557	0.107106	7.91104e-16	0.0113713	0.0903334	1.17316e-09	#N/A	17	17	17	Adipose_Visceral_Omentum
ENSG00000221571.3	RNU6ATAC35P	8.05099	0.257509	8.2125e-16	0.00178815	0.0309502	0.000461093	#N/A	4	4	4	Adipose_Visceral_Omentum
ENSG00000204287.13	HLA-DRA	8.04288	0.539384	8.77514e-16	0.000493926	0.0225674	0.00297208	#N/A	10	11	11	Adipose_Visceral_Omentum
ENSG00000146112.11	PPP1R18	8.03083	0.240692	9.68129e-16	0.00198661	0.0399797	8.27148e-05	#N/A	13	13	13	Adipose_Visceral_Omentum
ENSG00000160870.12	CYP3A7	-7.99442	-0.18025	1.30188e-15	0.0113998	0.0578339	1.15918e-06	#N/A	4	4	4	Adipose_Visceral_Omentum
ENSG00000175213.2	ZNF408	7.96909	0.223327	1.59843e-15	0.00289153	0.047954	1.25605e-05	#N/A	6	6	6	Adipose_Visceral_Omentum
ENSG00000198502.5	HLA-DRB5	-7.89263	-0.0250572	2.95887e-15	0.206149	0.62914	1.39308e-97	#N/A	16	19	19	Adipose_Visceral_Omentum
ENSG00000178425.13	NT5DC1	7.84939	0.120488	4.1805e-15	0.0075492	0.0471926	1.34009e-05	#N/A	43	43	43	Adipose_Visceral_Omentum
ENSG00000178188.14	SH2B1	-7.80297	-0.18754	6.04657e-15	0.00295668	0.0963874	3.73666e-10	#N/A	10	10	10	Adipose_Visceral_Omentum
ENSG00000213672.7	NCKIPSD	7.79231	0.0625208	6.57927e-15	0.0321157	0.223678	2.6477e-23	#N/A	14	14	14	Adipose_Visceral_Omentum
ENSG00000107798.17	LIPA	7.78004	0.046995	7.25007e-15	0.0559442	0.24587	5.02071e-26	#N/A	65	65	65	Adipose_Visceral_Omentum
ENSG00000165915.13	SLC39A13	7.75372	0.181837	8.92374e-15	0.00312134	0.0436994	3.26851e-05	#N/A	13	14	14	Adipose_Visceral_Omentum
ENSG00000261390.5	MAFTRR	-7.73564	-0.0304183	1.02888e-14	0.139371	0.448279	1.4563e-55	#N/A	11	11	11	Adipose_Visceral_Omentum
ENSG00000175489.9	LRRC25	-7.4968	-0.22342	6.53957e-14	0.00241219	0.093399	9.39553e-10	#N/A	4	4	4	Adipose_Visceral_Omentum
ENSG00000178252.17	WDR6	-7.45888	-0.0489369	8.72604e-14	0.0466171	0.397018	3.82379e-47	#N/A	44	46	46	Adipose_Visceral_Omentum
ENSG00000275342.4	PRAG1	-7.44531	-0.159858	9.672e-14	0.00486924	0.036358	0.000168232	#N/A	13	13	13	Adipose_Visceral_Omentum
ENSG00000114054.13	PCCB	-7.4098	-0.160427	1.26489e-13	0.00453039	0.0375291	0.000126167	#N/A	68	68	68	Adipose_Visceral_Omentum
ENSG00000175115.11	PACS1	-7.39061	-0.170094	1.46161e-13	0.00508674	0.0735236	6.34827e-08	#N/A	12	12	12	Adipose_Visceral_Omentum
ENSG00000283674.1	RP11-419I17.1	7.37247	0.163847	1.67496e-13	0.00477496	0.0251508	0.00189997	#N/A	16	16	16	Adipose_Visceral_Omentum
ENSG00000104884.14	ERCC2	-7.35531	-0.139787	1.90481e-13	0.00619043	0.078398	2.4547e-08	#N/A	13	13	13	Adipose_Visceral_Omentum
ENSG00000104643.9	MTMR9	7.31688	0.254041	2.53794e-13	0.00181455	0.0370512	0.000138364	#N/A	11	11	11	Adipose_Visceral_Omentum
ENSG00000105889.14	STEAP1B	7.20962	0.0594709	5.61072e-13	0.0318555	0.1506	1.82907e-15	#N/A	17	18	18	Adipose_Visceral_Omentum
ENSG00000251417.2	RP11-1348G14.4	-7.1767	-0.0404292	7.14117e-13	0.0541257	0.151257	1.80828e-15	#N/A	50	52	52	Adipose_Visceral_Omentum
ENSG00000239467.5	AC007405.6	-7.10346	-0.0832697	1.21676e-12	0.015637	0.0814145	8.66295e-09	#N/A	22	22	22	Adipose_Visceral_Omentum
ENSG00000011485.14	PPP5C	-7.08214	-0.070578	1.41944e-12	0.0184069	0.214299	2.82281e-22	#N/A	23	23	23	Adipose_Visceral_Omentum
ENSG00000178149.16	DALRD3	7.06366	0.25335	1.62171e-12	0.001596	0.0267067	0.00134379	#N/A	22	23	23	Adipose_Visceral_Omentum
ENSG00000204438.10	GPANK1	7.06204	0.122844	1.6408e-12	0.00533239	0.0216619	0.0037883	#N/A	29	29	29	Adipose_Visceral_Omentum
ENSG00000170425.3	ADORA2B	-7.05736	-0.0258399	1.69691e-12	0.120399	0.359758	3.81741e-41	#N/A	12	12	12	Adipose_Visceral_Omentum
ENSG00000213719.8	CLIC1	7.04437	0.31575	1.86298e-12	0.00086121	0.0318547	0.000466033	#N/A	15	16	16	Adipose_Visceral_Omentum
ENSG00000124140.13	SLC12A5	-7.00497	-0.0452082	2.47036e-12	0.0564628	0.161138	2.57487e-17	#N/A	15	16	16	Adipose_Visceral_Omentum
ENSG00000124257.6	NEURL2	7.00192	0.0568759	2.5248e-12	0.0343539	0.167689	9.91104e-18	#N/A	53	54	54	Adipose_Visceral_Omentum
ENSG00000277938.1	RP5-965G21.3	6.99629	0.333429	2.62833e-12	0.00102613	0.0187663	0.00772914	#N/A	8	8	8	Adipose_Visceral_Omentum
ENSG00000188227.12	ZNF793	-6.95336	-0.136157	3.5669e-12	0.00563203	0.116355	3.51954e-12	#N/A	18	18	18	Adipose_Visceral_Omentum
ENSG00000145692.14	BHMT	-6.94385	-0.0513191	3.81555e-12	0.0343003	0.12833	3.76999e-13	#N/A	27	27	27	Adipose_Visceral_Omentum
ENSG00000125618.16	PAX8	6.92491	0.0217544	4.36266e-12	0.165132	0.378159	2.38683e-44	#N/A	53	55	55	Adipose_Visceral_Omentum
ENSG00000164078.12	MST1R	6.89083	0.163085	5.5466e-12	0.00338345	0.0295386	0.000677925	#N/A	23	23	23	Adipose_Visceral_Omentum
ENSG00000165917.9	RAPSN	-6.88985	-0.0773502	5.58497e-12	0.0132064	0.0474445	1.67155e-05	#N/A	13	13	13	Adipose_Visceral_Omentum
ENSG00000100372.14	SLC25A17	6.83809	0.104806	8.0256e-12	0.00858353	0.0127704	0.0269722	#N/A	18	19	19	Adipose_Visceral_Omentum
ENSG00000187492.8	CDHR4	6.82135	0.0957346	9.01865e-12	0.00931205	0.0120089	0.0324518	#N/A	21	21	21	Adipose_Visceral_Omentum
ENSG00000176422.13	SPRYD4	-6.78421	-0.177978	1.16727e-11	0.00277606	0.0482847	1.48793e-05	#N/A	12	12	12	Adipose_Visceral_Omentum
ENSG00000244731.7	C4A	6.78289	0.035444	1.17796e-11	0.0591115	0.267712	8.58812e-29	#N/A	95	106	106	Adipose_Visceral_Omentum
ENSG00000177710.5	SLC35G5	-6.7646	-0.098981	1.33674e-11	0.0107231	0.0318606	0.000453461	#N/A	13	13	13	Adipose_Visceral_Omentum
ENSG00000162613.16	FUBP1	-6.73925	-0.251795	1.59205e-11	0.00128188	0.0439356	3.65183e-05	#N/A	5	6	6	Adipose_Visceral_Omentum
ENSG00000197165.10	SULT1A2	6.68248	0.0293027	2.3493e-11	0.0903895	0.364632	7.9884e-42	#N/A	30	33	33	Adipose_Visceral_Omentum
ENSG00000179639.10	FCER1A	-6.67634	-0.155869	2.44977e-11	0.00385304	0.033532	0.000300497	#N/A	10	10	10	Adipose_Visceral_Omentum
ENSG00000167077.12	MEI1	6.66873	0.0615446	2.58021e-11	0.0242477	0.143665	6.75646e-15	#N/A	30	30	30	Adipose_Visceral_Omentum
ENSG00000084774.13	CAD	6.65274	0.433401	2.87683e-11	0.000512162	0.01442	0.0190703	#N/A	14	14	14	Adipose_Visceral_Omentum
ENSG00000213722.8	DDAH2	-6.64818	-0.0991445	2.96747e-11	0.0115706	0.0585005	1.36554e-06	#N/A	87	88	88	Adipose_Visceral_Omentum
ENSG00000101104.12	PABPC1L	-6.62044	-0.124299	3.58124e-11	0.00480502	0.0388409	7.0616e-05	#N/A	20	21	21	Adipose_Visceral_Omentum
ENSG00000162434.11	JAK1	-6.61431	-0.106355	3.73292e-11	0.00719064	0.0341404	0.000286364	#N/A	81	81	81	Adipose_Visceral_Omentum
ENSG00000272221.1	XXbac-BPG181B23.7	-6.5755	-0.0219442	4.84888e-11	0.233369	0.610739	1.06793e-92	#N/A	50	52	52	Adipose_Visceral_Omentum
ENSG00000159917.15	ZNF235	-6.53308	-0.229631	6.44314e-11	0.00152552	0.0600372	1.02922e-06	#N/A	2	2	2	Adipose_Visceral_Omentum
ENSG00000125637.15	PSD4	-6.52128	-0.0533761	6.97076e-11	0.0300396	0.251069	1.32423e-26	#N/A	41	41	41	Adipose_Visceral_Omentum
ENSG00000226686.7	LINC01535	6.48557	0.0180924	8.83995e-11	0.268392	0.402222	1.65563e-48	#N/A	84	87	87	Adipose_Visceral_Omentum
ENSG00000224389.8	C4B	-6.46784	-0.103076	9.94159e-11	0.00573347	0.0249532	0.0017946	#N/A	31	32	32	Adipose_Visceral_Omentum
ENSG00000263001.5	GTF2I	-6.46561	-0.079581	1.00894e-10	0.0182216	0.246441	3.023e-26	#N/A	13	13	13	Adipose_Visceral_Omentum
ENSG00000116675.15	DNAJC6	-6.46171	-0.180978	1.03526e-10	0.00255352	0.0203002	0.00487647	#N/A	4	4	4	Adipose_Visceral_Omentum
ENSG00000106290.14	TAF6	-6.44891	-0.0953543	1.12661e-10	0.00960312	0.159158	1.8365e-16	#N/A	13	13	13	Adipose_Visceral_Omentum
ENSG00000142252.10	GEMIN7	-6.44847	-0.102978	1.12988e-10	0.00908806	0.109508	1.49831e-11	#N/A	22	22	22	Adipose_Visceral_Omentum
ENSG00000179588.8	ZFPM1	6.43774	0.210758	1.21264e-10	0.00204947	0.0176708	0.00936065	#N/A	8	8	8	Adipose_Visceral_Omentum
ENSG00000011295.15	TTC19	6.42538	0.0400982	1.31541e-10	0.0446198	0.15975	1.93991e-16	#N/A	70	72	72	Adipose_Visceral_Omentum
ENSG00000108384.14	RAD51C	-6.41429	-0.0580458	1.41484e-10	0.0201024	0.131796	9.26786e-14	#N/A	18	18	18	Adipose_Visceral_Omentum
ENSG00000164068.15	RNF123	6.37876	0.0767657	1.78522e-10	0.0145601	0.18417	4.44537e-19	#N/A	36	36	36	Adipose_Visceral_Omentum
ENSG00000153814.11	JAZF1	-6.34874	-0.136927	2.17086e-10	0.00426845	0.0772706	2.97324e-08	#N/A	24	25	25	Adipose_Visceral_Omentum
ENSG00000196236.12	XPNPEP3	6.32558	0.0419204	2.52286e-10	0.043597	0.272232	2.92228e-29	#N/A	21	21	21	Adipose_Visceral_Omentum
ENSG00000111142.13	METAP2	-6.31047	-0.171336	2.78181e-10	0.00283064	0.0135727	0.0227823	#N/A	62	62	62	Adipose_Visceral_Omentum
ENSG00000106258.13	CYP3A5	-6.3043	-0.079199	2.89501e-10	0.0163677	0.0111004	0.0378343	#N/A	28	28	28	Adipose_Visceral_Omentum
ENSG00000221838.9	AP4M1	-6.301	-0.0633358	2.95738e-10	0.0206238	0.215365	4.77224e-23	#N/A	17	17	17	Adipose_Visceral_Omentum
ENSG00000179344.16	HLA-DQB1	-6.24287	-0.0175857	4.29623e-10	0.238491	0.616161	2.27115e-93	#N/A	33	35	35	Adipose_Visceral_Omentum
ENSG00000143994.13	ABHD1	-6.22733	-0.188882	4.74445e-10	0.00279056	0.0445674	2.66008e-05	#N/A	9	9	9	Adipose_Visceral_Omentum
ENSG00000231389.7	HLA-DPA1	6.18763	0.0845321	6.10763e-10	0.0109799	0.0580794	1.82564e-06	#N/A	37	38	38	Adipose_Visceral_Omentum
ENSG00000225399.4	RP11-3B7.1	6.17752	0.0503032	6.51153e-10	0.0321501	0.102216	1.30821e-10	#N/A	14	14	14	Adipose_Visceral_Omentum
ENSG00000100997.18	ABHD12	6.15129	0.105072	7.68571e-10	0.00773495	0.127031	5.04527e-13	#N/A	26	28	28	Adipose_Visceral_Omentum
ENSG00000181315.10	ZNF322	-6.13316	-0.0411786	8.61519e-10	0.0476342	0.379348	4.88841e-44	#N/A	45	48	48	Adipose_Visceral_Omentum
ENSG00000171700.13	RGS19	-6.1311	-0.115847	8.72736e-10	0.00610944	0.141518	5.32877e-15	#N/A	18	18	18	Adipose_Visceral_Omentum
ENSG00000273258.1	RP11-394I13.3	6.11905	0.0550724	9.41347e-10	0.0234122	0.0812564	1.42419e-08	#N/A	23	23	23	Adipose_Visceral_Omentum
ENSG00000143612.19	C1orf43	6.1152	0.352627	9.64344e-10	0.000641641	0.0297937	0.000739882	#N/A	12	12	12	Adipose_Visceral_Omentum
ENSG00000142655.12	PEX14	6.11453	0.0810814	9.68392e-10	0.0101099	0.170362	1.99193e-17	#N/A	29	30	30	Adipose_Visceral_Omentum
ENSG00000157322.17	CLEC18A	-6.09637	-0.017981	1.08503e-09	0.222644	0.415538	5.18012e-50	#N/A	32	36	36	Adipose_Visceral_Omentum
ENSG00000270154.1	RP11-419I17.2	6.0926	0.165736	1.11094e-09	0.00296954	0.0190872	0.00698115	#N/A	6	7	7	Adipose_Visceral_Omentum
ENSG00000189050.15	RNFT1	6.06523	0.13099	1.31765e-09	0.00446954	0.0167744	0.0114145	#N/A	23	23	23	Adipose_Visceral_Omentum
ENSG00000175354.18	PTPN2	-6.06079	-0.0764747	1.35456e-09	0.0140284	0.0171509	0.00978321	#N/A	140	141	141	Adipose_Visceral_Omentum
ENSG00000167272.10	POP5	-6.05916	-0.234336	1.36832e-09	0.00137935	0.0395117	8.83533e-05	#N/A	8	8	8	Adipose_Visceral_Omentum
ENSG00000253678.1	RP11-981G7.3	6.04322	0.0553381	1.51071e-09	0.0256383	0.0478563	1.27979e-05	#N/A	21	21	21	Adipose_Visceral_Omentum
ENSG00000108387.14	SEPT4	-6.00748	-0.29873	1.88426e-09	0.000654945	0.0132199	0.0251536	#N/A	16	16	16	Adipose_Visceral_Omentum
ENSG00000176953.12	NFATC2IP	5.96856	0.185969	2.39359e-09	0.00242474	0.0226074	0.00315571	#N/A	8	9	9	Adipose_Visceral_Omentum
ENSG00000204920.10	ZNF155	5.96305	0.0319755	2.47566e-09	0.0740504	0.142268	8.47349e-15	#N/A	57	57	57	Adipose_Visceral_Omentum
ENSG00000166529.14	ZSCAN21	-5.94177	-0.0379177	2.81953e-09	0.0485794	0.171752	1.03055e-17	#N/A	25	26	26	Adipose_Visceral_Omentum
ENSG00000153982.10	GDPD1	5.93001	0.11975	3.02914e-09	0.00563297	0.0287762	0.000753676	#N/A	15	15	15	Adipose_Visceral_Omentum
ENSG00000105726.16	ATP13A1	5.91586	0.143165	3.30153e-09	0.0028645	0.0344442	0.000267275	#N/A	22	22	22	Adipose_Visceral_Omentum
ENSG00000206344.7	HCG27	5.8949	0.0409761	3.74899e-09	0.0541137	0.236518	8.54778e-25	#N/A	34	34	34	Adipose_Visceral_Omentum
ENSG00000146205.13	ANO7	5.86701	0.0309753	4.43721e-09	0.0686593	0.191769	9.29289e-20	#N/A	47	47	47	Adipose_Visceral_Omentum
ENSG00000267058.1	RP11-15A1.3	5.86192	0.0467516	4.57547e-09	0.0326814	0.0877035	3.30074e-09	#N/A	48	50	50	Adipose_Visceral_Omentum
ENSG00000142599.17	RERE	5.85598	0.0646064	4.74208e-09	0.0160738	0.182844	7.53056e-19	#N/A	30	30	30	Adipose_Visceral_Omentum
ENSG00000132837.14	DMGDH	-5.84524	-0.0819046	5.05826e-09	0.00950726	0.124435	7.29743e-13	#N/A	29	30	30	Adipose_Visceral_Omentum
ENSG00000149084.12	HSD17B12	-5.82803	-0.020255	5.60847e-09	0.161218	0.573283	1.32168e-83	#N/A	69	70	70	Adipose_Visceral_Omentum
ENSG00000176994.10	SMCR8	-5.82323	-0.186127	5.77206e-09	0.00216199	0.0353357	0.000211161	#N/A	12	14	14	Adipose_Visceral_Omentum
ENSG00000253958.1	CLDN23	5.81826	0.131546	5.94646e-09	0.00411838	0.0318487	0.000369308	#N/A	16	16	16	Adipose_Visceral_Omentum
ENSG00000228251.1	AC012442.6	-5.81694	-0.0753073	5.9935e-09	0.0114572	0.0136984	0.0213065	#N/A	25	25	25	Adipose_Visceral_Omentum
ENSG00000163798.13	SLC4A1AP	-5.81522	-0.163161	6.05548e-09	0.00273641	0.0476834	1.35259e-05	#N/A	12	12	12	Adipose_Visceral_Omentum
ENSG00000196381.10	ZNF781	-5.80669	-0.0366857	6.37195e-09	0.0459381	0.323208	9.60538e-36	#N/A	30	32	32	Adipose_Visceral_Omentum
ENSG00000152219.4	ARL14EP	-5.7693	-0.123814	7.96001e-09	0.00431855	0.0355732	0.000214146	#N/A	32	32	32	Adipose_Visceral_Omentum
ENSG00000175220.11	ARHGAP1	5.74725	0.0667994	9.07053e-09	0.0153292	0.111509	1.22661e-11	#N/A	42	42	42	Adipose_Visceral_Omentum
ENSG00000213676.10	ATF6B	5.68733	0.0672562	1.29038e-08	0.0151363	0.137884	2.42847e-14	#N/A	26	29	29	Adipose_Visceral_Omentum
ENSG00000149177.12	PTPRJ	-5.68559	-0.184028	1.30365e-08	0.002035	0.0419057	5.988e-05	#N/A	6	6	6	Adipose_Visceral_Omentum
ENSG00000146109.4	ABT1	5.68388	0.0957647	1.31676e-08	0.0069266	0.126348	3.37805e-13	#N/A	25	27	27	Adipose_Visceral_Omentum
ENSG00000114302.15	PRKAR2A	-5.67201	-0.30274	1.41132e-08	0.000762244	0.0136086	0.0234833	#N/A	6	6	6	Adipose_Visceral_Omentum
ENSG00000160049.11	DFFA	5.65524	0.253798	1.55628e-08	0.000918722	0.0179714	0.00877673	#N/A	11	11	11	Adipose_Visceral_Omentum
ENSG00000077585.13	GPR137B	5.65036	0.0785645	1.60113e-08	0.00986925	0.11009	2.15073e-11	#N/A	31	31	31	Adipose_Visceral_Omentum
ENSG00000101216.10	GMEB2	-5.64625	-0.0909664	1.63985e-08	0.00766497	0.131356	5.68801e-14	#N/A	15	16	16	Adipose_Visceral_Omentum
ENSG00000154127.9	UBASH3B	5.64159	0.130518	1.68483e-08	0.00365503	0.0344657	0.00025477	#N/A	12	13	13	Adipose_Visceral_Omentum
ENSG00000129219.13	PLD2	5.60359	0.0508318	2.09961e-08	0.0214565	0.212996	2.12194e-22	#N/A	23	25	25	Adipose_Visceral_Omentum
ENSG00000155849.15	ELMO1	5.59999	0.147575	2.14366e-08	0.003046	0.068336	1.58232e-07	#N/A	23	23	23	Adipose_Visceral_Omentum
ENSG00000149534.8	MS4A2	-5.55456	-0.0753816	2.78317e-08	0.0099738	0.0176718	0.00924527	#N/A	45	45	45	Adipose_Visceral_Omentum
ENSG00000173421.16	CCDC36	5.5448	0.040505	2.94298e-08	0.0403437	0.149494	2.11434e-15	#N/A	17	17	17	Adipose_Visceral_Omentum
ENSG00000149634.4	SPATA25	5.54336	0.0818747	2.96724e-08	0.0108639	0.0706349	1.28851e-07	#N/A	10	11	11	Adipose_Visceral_Omentum
ENSG00000136573.12	BLK	-5.53325	-0.164109	3.14355e-08	0.00261114	0.0146336	0.0184487	#N/A	10	13	13	Adipose_Visceral_Omentum
ENSG00000132563.15	REEP2	5.49289	0.0983296	3.95406e-08	0.00629163	0.0189701	0.00691856	#N/A	11	11	11	Adipose_Visceral_Omentum
ENSG00000169203.16	NPIPB12	5.49195	0.0358925	3.97519e-08	0.0492626	0.120107	1.68748e-12	#N/A	23	26	26	Adipose_Visceral_Omentum
ENSG00000177628.15	GBA	5.48657	0.174738	4.09804e-08	0.00189463	0.0476157	1.55304e-05	#N/A	31	36	36	Adipose_Visceral_Omentum
ENSG00000165916.8	PSMC3	5.48243	0.0972845	4.19518e-08	0.0061566	0.100942	1.28693e-10	#N/A	38	38	38	Adipose_Visceral_Omentum
ENSG00000163354.14	DCST2	-5.48144	-0.0834907	4.2187e-08	0.0106736	0.0465066	1.86047e-05	#N/A	46	48	48	Adipose_Visceral_Omentum
ENSG00000106484.14	MEST	-5.47462	-0.0914922	4.38456e-08	0.0075377	0.0896522	1.1393e-09	#N/A	14	14	14	Adipose_Visceral_Omentum
ENSG00000125458.6	NT5C	-5.46889	-0.0781881	4.52861e-08	0.00931323	0.0531395	3.34402e-06	#N/A	50	51	51	Adipose_Visceral_Omentum
ENSG00000133243.8	BTBD2	-5.41366	-0.139016	6.17506e-08	0.00240041	0.0562958	2.80303e-06	#N/A	4	4	4	Adipose_Visceral_Omentum
ENSG00000108474.16	PIGL	-5.39934	-0.183137	6.68871e-08	0.0015316	0.0319426	0.000414036	#N/A	13	13	13	Adipose_Visceral_Omentum
ENSG00000025156.12	HSF2	5.3851	0.0439842	7.24052e-08	0.0275468	0.179827	5.99402e-19	#N/A	76	76	76	Adipose_Visceral_Omentum
ENSG00000253669.3	KB-1732A1.1	5.37986	0.0585605	7.45422e-08	0.0191615	0.116863	4.82006e-12	#N/A	52	52	52	Adipose_Visceral_Omentum
ENSG00000196735.11	HLA-DQA1	-5.37779	-0.0278833	7.54046e-08	0.0663458	0.256557	9.26518e-28	#N/A	30	30	30	Adipose_Visceral_Omentum
ENSG00000122971.8	ACADS	-5.37507	-0.326229	7.65537e-08	0.000576583	0.0456503	2.71885e-05	#N/A	25	25	25	Adipose_Visceral_Omentum
ENSG00000160752.14	FDPS	-5.34453	-0.234396	9.06543e-08	0.00116371	0.0204913	0.00519313	#N/A	10	10	10	Adipose_Visceral_Omentum
ENSG00000228022.5	HCG20	5.33933	0.0419719	9.3292e-08	0.0309904	0.103237	1.13297e-10	#N/A	12	12	12	Adipose_Visceral_Omentum
ENSG00000196275.13	GTF2IRD2	-5.33807	-0.0282819	9.39428e-08	0.0918307	0.427575	1.20631e-52	#N/A	25	27	27	Adipose_Visceral_Omentum
ENSG00000185614.4	FAM212A	-5.33612	-0.142332	9.49547e-08	0.00268513	0.0103215	0.0458147	#N/A	33	33	33	Adipose_Visceral_Omentum
ENSG00000112561.17	TFEB	-5.32239	-0.169476	1.02415e-07	0.00180312	0.0113972	0.0366051	#N/A	9	9	9	Adipose_Visceral_Omentum
ENSG00000181666.17	HKR1	-5.28868	-0.255131	1.23203e-07	0.00104246	0.0222626	0.0036757	#N/A	18	18	18	Adipose_Visceral_Omentum
ENSG00000124562.9	SNRPC	-5.28552	-0.132359	1.25349e-07	0.00283194	0.0708274	9.5689e-08	#N/A	32	33	33	Adipose_Visceral_Omentum
ENSG00000164850.14	GPER1	5.26787	0.105361	1.38012e-07	0.00444423	0.0700862	1.15882e-07	#N/A	3	3	3	Adipose_Visceral_Omentum
ENSG00000213996.12	TM6SF2	5.24407	0.0843825	1.57075e-07	0.00712792	0.0700853	1.49578e-07	#N/A	10	10	10	Adipose_Visceral_Omentum
ENSG00000110871.14	COQ5	5.23504	0.0370921	1.64949e-07	0.0420871	0.39617	5.63112e-47	#N/A	58	59	59	Adipose_Visceral_Omentum
ENSG00000183150.7	GPR19	5.23296	0.0468031	1.66818e-07	0.0271499	0.0656933	3.05052e-07	#N/A	37	37	37	Adipose_Visceral_Omentum
ENSG00000157315.4	TMED6	5.21638	0.060955	1.82454e-07	0.0114691	0.0757993	3.08717e-08	#N/A	9	9	9	Adipose_Visceral_Omentum
ENSG00000128872.9	TMOD2	-5.19652	-0.126182	2.03051e-07	0.00337319	0.071991	9.28716e-08	#N/A	19	19	19	Adipose_Visceral_Omentum
ENSG00000273295.1	AP000350.5	5.1952	0.0136353	2.04495e-07	0.275315	0.600648	1.23431e-89	#N/A	51	51	51	Adipose_Visceral_Omentum
ENSG00000001617.11	SEMA3F	-5.19004	-0.0519467	2.10251e-07	0.0192072	0.0361267	0.000185705	#N/A	36	38	38	Adipose_Visceral_Omentum
ENSG00000272787.1	KB-226F1.2	-5.15776	-0.031466	2.49918e-07	0.0554092	0.149298	2.27298e-15	#N/A	11	11	11	Adipose_Visceral_Omentum
ENSG00000138039.14	LHCGR	-5.14584	-0.0314714	2.66321e-07	0.0456801	0.183899	1.17405e-19	#N/A	36	36	36	Adipose_Visceral_Omentum
ENSG00000244165.1	P2RY11	5.13951	0.0695897	2.75457e-07	0.0120819	0.16214	1.10571e-16	#N/A	13	13	13	Adipose_Visceral_Omentum
ENSG00000196652.11	ZKSCAN5	5.12751	0.262333	2.93597e-07	0.00108231	0.0120175	0.0306956	#N/A	15	15	15	Adipose_Visceral_Omentum
ENSG00000204687.4	MAS1L	-5.10085	-0.174989	3.38136e-07	0.00253588	0.0159322	0.0131616	#N/A	43	43	43	Adipose_Visceral_Omentum
ENSG00000178952.10	TUFM	5.10058	0.161967	3.38623e-07	0.00172983	0.0547906	2.98521e-06	#N/A	18	19	19	Adipose_Visceral_Omentum
ENSG00000167384.10	ZNF180	5.09358	0.173655	3.51362e-07	0.00155671	0.0465711	1.9988e-05	#N/A	6	7	7	Adipose_Visceral_Omentum
ENSG00000245330.4	KB-1471A8.1	5.08443	0.0485566	3.6873e-07	0.0227165	0.108543	2.22391e-11	#N/A	13	13	13	Adipose_Visceral_Omentum
ENSG00000149489.8	ROM1	5.08261	0.0272864	3.72282e-07	0.063461	0.344404	1.06172e-38	#N/A	24	24	24	Adipose_Visceral_Omentum
ENSG00000240972.1	MIF	5.0783	0.0137499	3.80824e-07	0.256699	0.531573	1.09051e-72	#N/A	34	36	36	Adipose_Visceral_Omentum
ENSG00000180263.13	FGD6	-5.05131	-0.112088	4.3878e-07	0.00378893	0.0589383	1.14889e-06	#N/A	6	6	6	Adipose_Visceral_Omentum
ENSG00000065060.16	UHRF1BP1	5.05102	0.0240352	4.39453e-07	0.0800278	0.459538	1.26825e-57	#N/A	33	34	34	Adipose_Visceral_Omentum
ENSG00000164535.14	DAGLB	-5.04507	-0.0248757	4.5336e-07	0.0697673	0.351811	2.60332e-40	#N/A	6	7	7	Adipose_Visceral_Omentum
ENSG00000160781.15	PAQR6	-5.02004	-0.039217	5.1662e-07	0.0335636	0.14837	1.19902e-15	#N/A	40	40	40	Adipose_Visceral_Omentum
ENSG00000244219.6	GS1-259H13.2	5.01856	0.0527219	5.2061e-07	0.0256889	0.0924145	1.20899e-09	#N/A	37	37	37	Adipose_Visceral_Omentum
ENSG00000196968.10	FUT11	5.01813	0.0574513	5.21772e-07	0.0126713	0.0814453	7.05515e-09	#N/A	30	30	30	Adipose_Visceral_Omentum
ENSG00000172543.7	CTSW	-5.01144	-0.0262083	5.40235e-07	0.0729673	0.408058	2.71745e-49	#N/A	18	18	18	Adipose_Visceral_Omentum
ENSG00000169519.20	METTL15	5.00705	0.157653	5.52696e-07	0.00186886	0.0425443	4.98144e-05	#N/A	23	24	24	Adipose_Visceral_Omentum
ENSG00000205710.3	C17orf107	4.98826	0.034317	6.09261e-07	0.0441112	0.199603	7.63709e-21	#N/A	26	26	26	Adipose_Visceral_Omentum
ENSG00000141458.12	NPC1	-4.98074	-0.0430618	6.33409e-07	0.0295217	0.217531	6.94732e-23	#N/A	32	32	32	Adipose_Visceral_Omentum
ENSG00000101639.18	CEP192	-4.96525	-0.0168546	6.86142e-07	0.185034	0.588737	3.32165e-87	#N/A	43	43	43	Adipose_Visceral_Omentum
ENSG00000100890.15	KIAA0391	4.96219	0.0558813	6.97014e-07	0.0177432	0.20144	7.77066e-21	#N/A	26	27	27	Adipose_Visceral_Omentum
ENSG00000198952.8	SMG5	-4.94204	-0.0643011	7.73107e-07	0.0127338	0.175341	2.29403e-18	#N/A	24	24	24	Adipose_Visceral_Omentum
ENSG00000204428.12	LY6G5C	-4.93884	-0.0382195	7.85897e-07	0.0406144	0.21628	1.00376e-23	#N/A	10	10	10	Adipose_Visceral_Omentum
ENSG00000169592.14	INO80E	-4.93842	-0.040167	7.87567e-07	0.0332004	0.308531	5.55454e-34	#N/A	33	33	33	Adipose_Visceral_Omentum
ENSG00000266265.2	KLF14	-4.92989	-0.234585	8.22767e-07	0.000919492	0.0301985	0.000589674	#N/A	8	8	8	Adipose_Visceral_Omentum
ENSG00000149499.11	EML3	-4.92756	-0.0470824	8.32629e-07	0.0190528	0.129306	1.88195e-13	#N/A	33	34	34	Adipose_Visceral_Omentum
ENSG00000141756.18	FKBP10	-4.91371	-0.361226	8.9367e-07	0.00034811	0.0130548	0.0251386	#N/A	18	20	20	Adipose_Visceral_Omentum
ENSG00000141027.20	NCOR1	-4.90889	-0.137018	9.15925e-07	0.00224518	0.0101954	0.0496706	#N/A	11	11	11	Adipose_Visceral_Omentum
ENSG00000271889.1	RP11-493E12.1	4.90182	0.0692402	9.49544e-07	0.0105633	0.0377869	0.00011031	#N/A	5	5	5	Adipose_Visceral_Omentum
ENSG00000283632.2	EXOC3L2	4.89981	0.187177	9.59306e-07	0.00162983	0.0102868	0.0476564	#N/A	7	7	7	Adipose_Visceral_Omentum
ENSG00000255760.1	RP11-428G5.5	-4.88407	-0.0955181	1.03917e-06	0.00537856	0.0247253	0.00211544	#N/A	14	14	14	Adipose_Visceral_Omentum
ENSG00000168813.16	ZNF507	-4.87843	-0.0925155	1.06934e-06	0.00709752	0.121371	1.46743e-12	#N/A	5	5	5	Adipose_Visceral_Omentum
ENSG00000167711.13	SERPINF2	4.86	0.0621064	1.17383e-06	0.0130541	0.118049	3.8939e-12	#N/A	35	36	36	Adipose_Visceral_Omentum
ENSG00000173825.6	TIGD3	-4.85579	-0.0616005	1.1991e-06	0.0118461	0.04464	3.15824e-05	#N/A	21	21	21	Adipose_Visceral_Omentum
ENSG00000235863.3	B3GALT4	4.85101	0.129355	1.22832e-06	0.00148222	0.0517792	5.83808e-06	#N/A	8	8	8	Adipose_Visceral_Omentum
ENSG00000137497.17	NUMA1	4.84731	0.201747	1.2515e-06	0.00104561	0.0298543	0.000728126	#N/A	17	19	19	Adipose_Visceral_Omentum
ENSG00000108556.7	CHRNE	4.84291	0.0185787	1.2795e-06	0.136075	0.353264	3.11279e-43	#N/A	18	18	18	Adipose_Visceral_Omentum
ENSG00000134905.16	CARS2	4.83125	0.0329706	1.35675e-06	0.0455769	0.289976	9.7304e-32	#N/A	26	26	26	Adipose_Visceral_Omentum
ENSG00000099977.13	DDT	4.83115	0.0519272	1.35746e-06	0.0167349	0.19397	9.18404e-21	#N/A	33	33	33	Adipose_Visceral_Omentum
ENSG00000204866.8	IGFL2	-4.82163	-0.128875	1.42388e-06	0.00292429	0.015232	0.0159553	#N/A	22	22	22	Adipose_Visceral_Omentum
ENSG00000187742.14	SECISBP2	-4.82123	-0.181392	1.42675e-06	0.00154784	0.0133911	0.0231695	#N/A	18	18	18	Adipose_Visceral_Omentum
ENSG00000177479.19	ARIH2	4.81876	0.0968556	1.44451e-06	0.00535549	0.0393391	8.6946e-05	#N/A	28	28	28	Adipose_Visceral_Omentum
ENSG00000196154.11	S100A4	-4.81428	-0.0656028	1.47732e-06	0.0104812	0.118256	1.5294e-12	#N/A	24	24	24	Adipose_Visceral_Omentum
ENSG00000128881.16	TTBK2	4.81068	0.145705	1.50414e-06	0.0018127	0.0108144	0.0426754	#N/A	38	38	38	Adipose_Visceral_Omentum
ENSG00000155542.11	SETD9	4.78365	0.0311545	1.72139e-06	0.0520237	0.308341	1.08648e-34	#N/A	44	44	44	Adipose_Visceral_Omentum
ENSG00000170581.13	STAT2	4.77647	0.0829107	1.78401e-06	0.00695307	0.0774742	2.50593e-08	#N/A	15	15	15	Adipose_Visceral_Omentum
ENSG00000223496.2	EXOSC6	-4.77591	-0.0174525	1.78899e-06	0.150725	0.624353	1.32338e-96	#N/A	12	12	12	Adipose_Visceral_Omentum
ENSG00000164338.9	UTP15	4.77464	0.353725	1.80032e-06	0.000351477	0.0153675	0.0152181	#N/A	6	6	6	Adipose_Visceral_Omentum
ENSG00000168394.10	TAP1	-4.74416	-0.10908	2.09376e-06	0.00276536	0.0113311	0.0364737	#N/A	20	25	25	Adipose_Visceral_Omentum
ENSG00000182333.14	LIPF	-4.70635	-0.0244948	2.52192e-06	0.0641501	0.0166716	0.0116448	#N/A	60	64	64	Adipose_Visceral_Omentum
ENSG00000153214.9	TMEM87B	4.68789	0.0470209	2.76037e-06	0.0221847	0.19809	1.30938e-20	#N/A	20	20	20	Adipose_Visceral_Omentum
ENSG00000119599.16	DCAF4	4.68774	0.022375	2.76244e-06	0.076513	0.320389	1.49269e-35	#N/A	42	42	42	Adipose_Visceral_Omentum
ENSG00000160602.13	NEK8	4.68758	0.100858	2.76456e-06	0.00447379	0.0275691	0.00115533	#N/A	14	15	15	Adipose_Visceral_Omentum
ENSG00000077097.15	TOP2B	4.68414	0.190633	2.81133e-06	0.00104174	0.0174466	0.00975982	#N/A	4	4	4	Adipose_Visceral_Omentum
ENSG00000169313.9	P2RY12	-4.66776	-0.0342977	3.04507e-06	0.0376066	0.224329	1.53978e-23	#N/A	47	48	48	Adipose_Visceral_Omentum
ENSG00000212864.3	RNF208	-4.65896	-2.05024	3.17816e-06	1.20483e-05	0.0308587	0.000484666	#N/A	3	5	5	Adipose_Visceral_Omentum
ENSG00000138315.12	OIT3	4.6564	0.163968	3.2179e-06	0.00145648	0.0122393	0.030103	#N/A	10	10	10	Adipose_Visceral_Omentum
ENSG00000101460.12	MAP1LC3A	-4.65303	-0.0350432	3.27098e-06	0.0314464	0.279027	2.30087e-31	#N/A	32	33	33	Adipose_Visceral_Omentum
ENSG00000204536.13	CCHCR1	-4.63812	-0.0272235	3.516e-06	0.0498107	0.419224	2.03238e-51	#N/A	31	32	32	Adipose_Visceral_Omentum
ENSG00000091844.7	RGS17	-4.63154	-0.0461719	3.62952e-06	0.0213839	0.127499	3.61576e-13	#N/A	32	32	32	Adipose_Visceral_Omentum
ENSG00000166963.12	MAP1A	4.61895	0.132788	3.85696e-06	0.00218412	0.0259454	0.00160822	#N/A	13	13	13	Adipose_Visceral_Omentum
ENSG00000254343.2	RP11-760H22.2	4.60232	0.191203	4.17812e-06	0.00109922	0.0255946	0.0018055	#N/A	4	4	4	Adipose_Visceral_Omentum
ENSG00000133059.16	DSTYK	-4.59527	-0.291894	4.32183e-06	0.000548813	0.0299986	0.000693642	#N/A	5	5	5	Adipose_Visceral_Omentum
ENSG00000115419.12	GLS	-4.58968	-0.120733	4.43921e-06	0.0030919	0.0479494	1.52895e-05	#N/A	30	30	30	Adipose_Visceral_Omentum
ENSG00000164830.18	OXR1	4.5829	0.0828843	4.58567e-06	0.00625201	0.0795622	1.75854e-08	#N/A	61	63	63	Adipose_Visceral_Omentum
ENSG00000204922.4	UQCC3	4.56841	0.168415	4.91444e-06	0.00136805	0.0161853	0.0126212	#N/A	5	5	5	Adipose_Visceral_Omentum
ENSG00000151640.12	DPYSL4	4.55739	0.0136349	5.17928e-06	0.27657	0.523514	7.28097e-71	#N/A	36	36	36	Adipose_Visceral_Omentum
ENSG00000183336.8	BOLA2	-4.55712	-0.0221166	5.18605e-06	0.0778833	0.172328	5.98108e-18	#N/A	19	19	19	Adipose_Visceral_Omentum
ENSG00000169689.14	CENPX	-4.55598	-0.0256636	5.21426e-06	0.0571625	0.352036	3.03362e-40	#N/A	25	25	25	Adipose_Visceral_Omentum
ENSG00000213246.6	SUPT4H1	4.55372	0.0720839	5.27043e-06	0.00729485	0.123118	1.18234e-12	#N/A	13	13	13	Adipose_Visceral_Omentum
ENSG00000142089.15	IFITM3	-4.54733	-0.0853602	5.43312e-06	0.00681956	0.088344	2.25087e-09	#N/A	49	49	49	Adipose_Visceral_Omentum
ENSG00000060642.10	PIGV	4.54638	0.0683342	5.45776e-06	0.0076503	0.0920936	9.14131e-10	#N/A	31	31	31	Adipose_Visceral_Omentum
ENSG00000120784.15	ZFP30	4.53745	0.0617795	5.69392e-06	0.012828	0.0666158	2.33789e-07	#N/A	47	49	49	Adipose_Visceral_Omentum
ENSG00000084764.10	MAPRE3	-4.5343	-0.294962	5.77947e-06	0.000445437	0.015711	0.0148307	#N/A	17	17	17	Adipose_Visceral_Omentum
ENSG00000143578.15	CREB3L4	-4.5167	-0.0812626	6.28102e-06	0.00686199	0.0596301	1.18748e-06	#N/A	25	25	25	Adipose_Visceral_Omentum
ENSG00000119318.12	RAD23B	-4.51555	-0.229303	6.31515e-06	0.000645544	0.0208618	0.00475292	#N/A	16	16	16	Adipose_Visceral_Omentum
ENSG00000196586.13	MYO6	-4.51097	-0.0947812	6.45314e-06	0.00442468	0.066321	3.30612e-07	#N/A	18	18	18	Adipose_Visceral_Omentum
ENSG00000160712.12	IL6R	38.5925	0.68956	0	0.00787029	0.124555	3.22546e-15	#N/A	12	12	12	Artery_Tibial
ENSG00000157837.15	SPPL3	25.287	0.507683	4.44314e-141	0.00512513	0.0769671	9.05512e-10	#N/A	19	20	20	Artery_Tibial
ENSG00000135124.14	P2RX4	-21.9304	-0.163251	1.33304e-106	0.0341315	0.272768	1.52506e-35	#N/A	29	29	29	Artery_Tibial
ENSG00000130202.9	NECTIN2	20.4455	0.279707	6.58361e-93	0.0102435	0.0824535	2.05654e-10	#N/A	34	40	40	Artery_Tibial
ENSG00000115216.13	NRBP1	19.2747	0.449651	8.76613e-83	0.00412725	0.0762029	9.10219e-10	#N/A	21	22	22	Artery_Tibial
ENSG00000163239.12	TDRD10	-18.1607	-0.330905	1.05757e-73	0.00652979	0.0932586	9.32819e-12	#N/A	21	21	21	Artery_Tibial
ENSG00000115234.10	SNX17	17.6289	0.545662	1.47816e-69	0.00235742	0.0410906	1.08321e-05	#N/A	10	11	11	Artery_Tibial
ENSG00000110931.18	CAMKK2	-16.8741	-0.21124	6.98283e-64	0.0160897	0.140536	2.28387e-17	#N/A	37	38	38	Artery_Tibial
ENSG00000122971.8	ACADS	-15.5828	-0.195362	9.53611e-55	0.0132127	0.122675	4.17515e-15	#N/A	8	8	8	Artery_Tibial
ENSG00000266970.1	RP11-806H10.4	13.4913	0.405664	1.76044e-41	0.0025859	0.017672	0.0036196	#N/A	8	8	8	Artery_Tibial
ENSG00000160710.15	ADAR	13.2422	0.275824	5.00703e-40	0.00498342	0.0294457	0.000207567	#N/A	35	35	35	Artery_Tibial
ENSG00000237541.3	HLA-DQA2	13.0721	0.0287254	4.75508e-39	0.385589	0.701825	3.59615e-148	#N/A	67	69	69	Artery_Tibial
ENSG00000100201.20	DDX17	-13.0498	-0.388383	6.37208e-39	0.00252886	0.0488884	1.27655e-06	#N/A	14	14	14	Artery_Tibial
ENSG00000157895.11	C12orf43	12.7287	0.0814165	4.09848e-37	0.0699098	0.37723	4.95836e-53	#N/A	64	73	73	Artery_Tibial
ENSG00000100211.10	CBY1	12.6307	0.104719	1.43082e-36	0.0325583	0.341194	1.49635e-46	#N/A	38	38	38	Artery_Tibial
ENSG00000090621.13	PABPC4	-12.5949	-0.193943	2.25265e-36	0.00885563	0.149526	2.38745e-18	#N/A	7	7	7	Artery_Tibial
ENSG00000186567.12	CEACAM19	-12.5909	-0.0869209	2.37046e-36	0.0399059	0.18263	1.1198e-22	#N/A	94	95	95	Artery_Tibial
ENSG00000175970.10	UNC119B	-12.3579	-0.212973	4.41533e-35	0.00710822	0.0875602	6.2347e-11	#N/A	13	13	13	Artery_Tibial
ENSG00000184949.15	FAM227A	-12.2714	-0.115441	1.29077e-34	0.0250167	0.161899	6.88878e-20	#N/A	27	27	27	Artery_Tibial
ENSG00000163568.14	AIM2	12.0086	0.276068	3.20114e-33	0.00397378	0.0205244	0.00198392	#N/A	27	27	27	Artery_Tibial
ENSG00000175164.13	ABO	11.5324	0.130683	9.056e-31	0.0168079	0.181361	1.55083e-22	#N/A	38	39	39	Artery_Tibial
ENSG00000104853.15	CLPTM1	11.377	0.306702	5.44265e-30	0.00336485	0.0133886	0.0127693	#N/A	62	63	63	Artery_Tibial
ENSG00000167384.10	ZNF180	11.1229	0.260529	9.70313e-29	0.00351728	0.0141303	0.0103992	#N/A	23	23	23	Artery_Tibial
ENSG00000183682.7	BMP8A	11.0602	0.195864	1.95567e-28	0.00662026	0.0498016	9.68511e-07	#N/A	2	2	2	Artery_Tibial
ENSG00000204525.16	HLA-C	-11.0137	-0.054529	3.28232e-28	0.082452	0.518104	5.48803e-84	#N/A	68	71	71	Artery_Tibial
ENSG00000079459.12	FDFT1	10.9108	0.0735571	1.0239e-27	0.0480408	0.33611	8.90713e-46	#N/A	11	11	11	Artery_Tibial
ENSG00000204388.6	HSPA1B	-10.605	-0.142902	2.82545e-26	0.0100345	0.0297473	0.000186802	#N/A	25	25	25	Artery_Tibial
ENSG00000196126.11	HLA-DRB1	-10.5216	-0.108549	6.87203e-26	0.0180391	0.236077	5.91053e-30	#N/A	70	71	71	Artery_Tibial
ENSG00000240053.8	LY6G5B	-10.1947	-0.10929	2.09375e-24	0.0187947	0.295867	1.31521e-39	#N/A	90	90	90	Artery_Tibial
ENSG00000182179.12	UBA7	-10.1401	-0.247327	3.66631e-24	0.00331629	0.0611188	6.15229e-08	#N/A	17	17	17	Artery_Tibial
ENSG00000186074.18	CD300LF	10.072	0.140408	7.34676e-24	0.00967346	0.0313259	0.000116663	#N/A	27	27	27	Artery_Tibial
ENSG00000196735.11	HLA-DQA1	-9.89164	-0.0716611	4.52567e-23	0.0347443	0.249058	9.24328e-32	#N/A	24	25	25	Artery_Tibial
ENSG00000189050.15	RNFT1	9.85971	0.128688	6.22292e-23	0.0120708	0.0599111	9.07032e-08	#N/A	37	37	37	Artery_Tibial
ENSG00000198945.7	L3MBTL3	-9.71012	-0.190752	2.73019e-22	0.00568669	0.0502287	9.62562e-07	#N/A	25	25	25	Artery_Tibial
ENSG00000089041.16	P2RX7	-9.70135	-0.410041	2.9753e-22	0.00113309	0.0172449	0.00464996	#N/A	16	16	16	Artery_Tibial
ENSG00000018625.14	ATP1A2	9.63283	0.215961	5.81071e-22	0.0063391	0.117958	1.05644e-14	#N/A	38	38	38	Artery_Tibial
ENSG00000004534.14	RBM6	-9.52589	-0.050111	1.6364e-21	0.0699771	0.518917	6.46342e-84	#N/A	33	33	33	Artery_Tibial
ENSG00000164078.12	MST1R	9.5008	0.0984908	2.08285e-21	0.0184682	0.0642386	2.90504e-08	#N/A	39	39	39	Artery_Tibial
ENSG00000198754.5	OXCT2	9.39661	0.066874	5.63474e-21	0.0410696	0.129654	6.01012e-16	#N/A	25	27	27	Artery_Tibial
ENSG00000203896.9	LIME1	-9.38681	-0.0982755	6.18476e-21	0.0178918	0.139716	3.05448e-17	#N/A	44	44	44	Artery_Tibial
ENSG00000138085.16	ATRAID	-9.20464	-0.109576	3.42804e-20	0.0151806	0.215945	2.45662e-27	#N/A	29	29	29	Artery_Tibial
ENSG00000172247.3	C1QTNF4	-9.14225	-0.0502511	6.11646e-20	0.0599114	0.185449	7.43625e-23	#N/A	42	42	42	Artery_Tibial
ENSG00000138092.10	CENPO	9.10821	0.0776619	8.37506e-20	0.0283258	0.15607	4.03267e-19	#N/A	38	39	39	Artery_Tibial
ENSG00000204257.14	HLA-DMA	-9.10086	-0.209609	8.96193e-20	0.00270003	0.0652681	2.36609e-08	#N/A	13	13	13	Artery_Tibial
ENSG00000214530.8	STARD10	8.98378	0.0916052	2.61617e-19	0.0196522	0.218681	2.09894e-27	#N/A	19	19	19	Artery_Tibial
ENSG00000224389.8	C4B	-8.90824	-0.0662077	5.18504e-19	0.0342601	0.120454	7.04123e-15	#N/A	93	94	94	Artery_Tibial
ENSG00000114054.13	PCCB	-8.83946	-0.10444	9.61825e-19	0.0147954	0.106091	3.13729e-13	#N/A	37	37	37	Artery_Tibial
ENSG00000138031.14	ADCY3	8.71495	0.0619687	2.90882e-18	0.041172	0.270241	1.39288e-35	#N/A	48	49	49	Artery_Tibial
ENSG00000204463.12	BAG6	8.68674	0.0538706	3.72983e-18	0.0526362	0.501867	1.19141e-80	#N/A	22	23	23	Artery_Tibial
ENSG00000184110.14	EIF3C	8.62071	0.073678	6.65382e-18	0.0273705	0.102265	9.38703e-13	#N/A	15	15	15	Artery_Tibial
ENSG00000164068.15	RNF123	8.46981	0.093687	2.45802e-17	0.0164517	0.185008	3.53632e-23	#N/A	23	23	23	Artery_Tibial
ENSG00000196683.10	TOMM7	8.30211	0.120901	1.02279e-16	0.0089578	0.229087	7.59384e-29	#N/A	15	15	15	Artery_Tibial
ENSG00000187244.10	BCAM	-8.25284	-0.221623	1.54675e-16	0.00282743	0.0301025	0.000153365	#N/A	41	42	42	Artery_Tibial
ENSG00000062370.16	ZNF112	-8.1925	-0.0841437	2.55845e-16	0.0183548	0.0973997	2.58009e-12	#N/A	27	27	27	Artery_Tibial
ENSG00000008710.19	PKD1	8.18873	0.265197	2.63987e-16	0.00194104	0.0536885	3.36466e-07	#N/A	19	19	19	Artery_Tibial
ENSG00000205609.12	EIF3CL	8.00592	0.248872	1.18578e-15	0.00224476	0.0180753	0.00355376	#N/A	4	4	4	Artery_Tibial
ENSG00000176046.8	NUPR1	-7.99918	-0.050397	1.25249e-15	0.0473347	0.284118	3.20625e-37	#N/A	25	25	25	Artery_Tibial
ENSG00000165916.8	PSMC3	7.95865	0.201393	1.73932e-15	0.00269271	0.0931785	9.1327e-12	#N/A	20	20	20	Artery_Tibial
ENSG00000243649.8	CFB	-7.93279	-0.0948083	2.14285e-15	0.0137967	0.105572	4.79122e-13	#N/A	32	36	36	Artery_Tibial
ENSG00000110871.14	COQ5	7.92866	0.0299519	2.21521e-15	0.145781	0.533377	7.63794e-89	#N/A	50	51	51	Artery_Tibial
ENSG00000125637.15	PSD4	-7.92259	-0.0940826	2.32619e-15	0.0140822	0.143009	1.77972e-17	#N/A	34	34	34	Artery_Tibial
ENSG00000176476.8	SGF29	-7.8939	-0.150538	2.92889e-15	0.00507488	0.104654	3.35588e-13	#N/A	15	15	15	Artery_Tibial
ENSG00000149177.12	PTPRJ	-7.79984	-0.174785	6.19869e-15	0.00431379	0.0623951	3.2843e-08	#N/A	15	15	15	Artery_Tibial
ENSG00000188322.4	SBK1	-7.76061	-0.134922	8.45248e-15	0.00651602	0.0224878	0.00105124	#N/A	8	8	8	Artery_Tibial
ENSG00000176182.5	MYPOP	7.71748	0.307468	1.18648e-14	0.00338352	0.0174805	0.00442976	#N/A	47	49	49	Artery_Tibial
ENSG00000197165.10	SULT1A2	7.70557	0.0282666	1.30259e-14	0.137712	0.34045	9.17098e-48	#N/A	20	20	20	Artery_Tibial
ENSG00000213672.7	NCKIPSD	7.6924	0.0513266	1.44397e-14	0.0451381	0.289182	7.359e-39	#N/A	24	25	25	Artery_Tibial
ENSG00000167272.10	POP5	-7.60288	-0.189903	2.89602e-14	0.00344217	0.0358848	3.86107e-05	#N/A	45	46	46	Artery_Tibial
ENSG00000125459.14	MSTO1	7.54187	0.54024	4.63296e-14	0.00043751	0.0101559	0.0300453	#N/A	4	4	4	Artery_Tibial
ENSG00000101246.19	ARFRP1	7.50528	0.258137	6.12982e-14	0.00168102	0.0257517	0.000499745	#N/A	13	13	13	Artery_Tibial
ENSG00000089163.4	SIRT4	-7.47114	-0.0878692	7.95056e-14	0.01068	0.0811223	3.52011e-10	#N/A	14	14	14	Artery_Tibial
ENSG00000261390.5	MAFTRR	-7.40598	-0.030691	1.30187e-13	0.127679	0.41257	3.67054e-60	#N/A	11	11	11	Artery_Tibial
ENSG00000178252.17	WDR6	-7.3821	-0.0594275	1.55807e-13	0.0310818	0.345592	1.83434e-48	#N/A	55	56	56	Artery_Tibial
ENSG00000188566.13	NDOR1	7.36048	0.676103	1.83251e-13	0.000250003	0.116414	1.59489e-14	#N/A	10	12	12	Artery_Tibial
ENSG00000178952.10	TUFM	7.33461	0.0534583	2.22361e-13	0.0355646	0.35459	5.69172e-49	#N/A	35	35	35	Artery_Tibial
ENSG00000146205.13	ANO7	7.31748	0.0424552	2.52663e-13	0.059505	0.187656	1.84094e-23	#N/A	15	16	16	Artery_Tibial
ENSG00000170855.3	TRIAP1	7.28042	0.114334	3.32781e-13	0.00792738	0.054996	3.15727e-07	#N/A	36	36	36	Artery_Tibial
ENSG00000270154.1	RP11-419I17.2	7.27921	0.0803617	3.35779e-13	0.0185923	0.0345652	5.79029e-05	#N/A	27	27	27	Artery_Tibial
ENSG00000221838.9	AP4M1	-7.25738	-0.0381213	3.94669e-13	0.0731702	0.287608	7.52746e-38	#N/A	50	51	51	Artery_Tibial
ENSG00000233232.6	NPIPB7	-7.24232	-0.0512778	4.41086e-13	0.037183	0.0877073	5.25381e-11	#N/A	10	11	11	Artery_Tibial
ENSG00000232629.8	HLA-DQB2	7.24074	0.0190107	4.46227e-13	0.263351	0.650829	1.46143e-126	#N/A	44	45	45	Artery_Tibial
ENSG00000258366.7	RTEL1	7.19097	0.0601022	6.4334e-13	0.0280049	0.248646	3.72179e-32	#N/A	31	31	31	Artery_Tibial
ENSG00000011295.15	TTC19	7.17292	0.0871368	7.34169e-13	0.0118668	0.12248	3.73994e-15	#N/A	19	19	19	Artery_Tibial
ENSG00000272221.1	XXbac-BPG181B23.7	-7.16961	-0.0208906	7.52141e-13	0.313845	0.610721	5.49262e-112	#N/A	108	110	110	Artery_Tibial
ENSG00000100979.14	PLTP	7.16347	0.0936676	7.8661e-13	0.0129764	0.136123	8.44255e-17	#N/A	15	15	15	Artery_Tibial
ENSG00000187492.8	CDHR4	7.08197	0.086803	1.42121e-12	0.012672	0.0659085	1.54659e-08	#N/A	23	24	24	Artery_Tibial
ENSG00000206344.7	HCG27	6.95438	0.0420059	3.54116e-12	0.0610323	0.332377	3.18283e-46	#N/A	55	57	57	Artery_Tibial
ENSG00000145692.14	BHMT	-6.95177	-0.0696672	3.60725e-12	0.0183773	0.0768918	9.1727e-10	#N/A	14	14	14	Artery_Tibial
ENSG00000196236.12	XPNPEP3	6.93503	0.0484982	4.06121e-12	0.040126	0.196615	2.02786e-24	#N/A	31	31	31	Artery_Tibial
ENSG00000067182.7	TNFRSF1A	6.93314	0.151087	4.11613e-12	0.00382437	0.0945452	8.86472e-12	#N/A	22	23	23	Artery_Tibial
ENSG00000152219.4	ARL14EP	-6.92823	-0.125065	4.26136e-12	0.00613652	0.0654172	1.12087e-08	#N/A	35	35	35	Artery_Tibial
ENSG00000179639.10	FCER1A	-6.92673	-0.0831664	4.30687e-12	0.0131894	0.111873	8.09566e-14	#N/A	24	24	24	Artery_Tibial
ENSG00000170425.3	ADORA2B	-6.92283	-0.0174699	4.42697e-12	0.261559	0.485313	2.74571e-76	#N/A	22	22	22	Artery_Tibial
ENSG00000100997.18	ABHD12	6.91995	0.0501749	4.51796e-12	0.0418691	0.352344	6.05725e-49	#N/A	72	72	72	Artery_Tibial
ENSG00000175220.11	ARHGAP1	6.91702	0.165723	4.61238e-12	0.00370932	0.0325679	6.95224e-05	#N/A	19	19	19	Artery_Tibial
ENSG00000196968.10	FUT11	6.91518	0.120822	4.67286e-12	0.00545466	0.0842914	1.53052e-10	#N/A	13	13	13	Artery_Tibial
ENSG00000196502.11	SULT1A1	-6.90446	-0.0453222	5.03956e-12	0.045272	0.233213	2.05132e-29	#N/A	41	46	46	Artery_Tibial
ENSG00000111816.7	FRK	-6.90072	-0.0695139	5.17405e-12	0.0174403	0.179998	1.77633e-22	#N/A	12	12	12	Artery_Tibial
ENSG00000214941.7	ZSWIM7	-6.89497	-0.0649801	5.38746e-12	0.018696	0.16474	1.83244e-20	#N/A	7	7	7	Artery_Tibial
ENSG00000142252.10	GEMIN7	-6.87339	-0.070087	6.26937e-12	0.0212893	0.143842	1.1048e-17	#N/A	62	62	62	Artery_Tibial
ENSG00000213658.11	LAT	6.84748	0.101165	7.51636e-12	0.0088873	0.0993173	2.07628e-12	#N/A	15	16	16	Artery_Tibial
ENSG00000110917.7	MLEC	-6.84338	-0.175438	7.73459e-12	0.00296856	0.081711	3.19825e-10	#N/A	21	21	21	Artery_Tibial
ENSG00000110079.16	MS4A4A	6.80523	0.280163	1.00889e-11	0.00107987	0.0190799	0.00284265	#N/A	6	6	6	Artery_Tibial
ENSG00000251417.2	RP11-1348G14.4	-6.73894	-0.0234482	1.59547e-11	0.153022	0.337186	2.34288e-46	#N/A	58	58	58	Artery_Tibial
ENSG00000180210.14	F2	6.73025	0.0695249	1.69368e-11	0.0192736	0.0820699	2.33165e-10	#N/A	14	15	15	Artery_Tibial
ENSG00000163798.13	SLC4A1AP	-6.72399	-0.328163	1.76814e-11	0.00100306	0.0136091	0.0109521	#N/A	3	4	4	Artery_Tibial
ENSG00000153814.11	JAZF1	-6.69918	-0.136021	2.09599e-11	0.00452633	0.113785	5.64488e-14	#N/A	10	10	10	Artery_Tibial
ENSG00000110536.13	PTPMT1	-6.67952	-0.142486	2.39721e-11	0.00451786	0.0126726	0.0150514	#N/A	12	13	13	Artery_Tibial
ENSG00000141027.20	NCOR1	-6.67348	-0.24085	2.49807e-11	0.00139217	0.0470861	1.89494e-06	#N/A	15	15	15	Artery_Tibial
ENSG00000185614.4	FAM212A	-6.62219	-0.121128	3.53913e-11	0.00608261	0.0398528	1.33053e-05	#N/A	17	17	17	Artery_Tibial
ENSG00000176953.12	NFATC2IP	6.61914	0.175682	3.61295e-11	0.00292782	0.0264428	0.000413426	#N/A	20	20	20	Artery_Tibial
ENSG00000169682.17	SPNS1	6.61625	0.112057	3.68424e-11	0.00667203	0.054677	2.70787e-07	#N/A	11	11	11	Artery_Tibial
ENSG00000100138.13	SNU13	-6.6075	-0.178091	3.90863e-11	0.00293444	0.0634437	3.0123e-08	#N/A	14	14	14	Artery_Tibial
ENSG00000196381.10	ZNF781	-6.59099	-0.0757213	4.36891e-11	0.015566	0.109607	1.40315e-13	#N/A	30	30	30	Artery_Tibial
ENSG00000116641.17	DOCK7	6.53517	0.100664	6.35353e-11	0.00738403	0.132977	2.80611e-16	#N/A	19	19	19	Artery_Tibial
ENSG00000214944.9	ARHGEF28	6.49728	0.0961923	8.17838e-11	0.00908092	0.0773233	7.01355e-10	#N/A	14	14	14	Artery_Tibial
ENSG00000171700.13	RGS19	-6.46797	-0.141288	9.93267e-11	0.00423663	0.0836613	1.24111e-10	#N/A	6	6	6	Artery_Tibial
ENSG00000173421.16	CCDC36	6.46691	0.0204939	1.00027e-10	0.206142	0.360133	4.34177e-50	#N/A	81	84	84	Artery_Tibial
ENSG00000188612.11	SUMO2	6.46108	0.216502	1.03957e-10	0.00182712	0.0726991	2.65902e-09	#N/A	7	7	7	Artery_Tibial
ENSG00000149084.12	HSD17B12	-6.43353	-0.019913	1.24677e-10	0.196649	0.627895	9.22907e-118	#N/A	50	50	50	Artery_Tibial
ENSG00000204428.12	LY6G5C	-6.42356	-0.100913	1.33121e-10	0.0089672	0.0800325	3.38585e-10	#N/A	15	15	15	Artery_Tibial
ENSG00000167083.6	GNGT2	6.4194	0.169075	1.36816e-10	0.00262348	0.0268794	0.000402243	#N/A	8	9	9	Artery_Tibial
ENSG00000160767.20	FAM189B	-6.40166	-0.139236	1.53699e-10	0.00414132	0.0722797	2.70234e-09	#N/A	29	30	30	Artery_Tibial
ENSG00000173281.4	PPP1R3B	6.39292	0.10649	1.62752e-10	0.00737107	0.0362173	3.84647e-05	#N/A	41	41	41	Artery_Tibial
ENSG00000100412.15	ACO2	6.3819	0.12189	1.749e-10	0.00551292	0.0492581	1.32343e-06	#N/A	35	35	35	Artery_Tibial
ENSG00000231389.7	HLA-DPA1	6.37641	0.0981885	1.81289e-10	0.00791298	0.168963	8.14041e-21	#N/A	32	37	37	Artery_Tibial
ENSG00000178057.14	NDUFAF3	6.37411	0.291859	1.84025e-10	0.000970817	0.0292328	0.000212259	#N/A	11	11	11	Artery_Tibial
ENSG00000110514.19	MADD	-6.33331	-0.136298	2.39959e-10	0.00443679	0.0425467	5.40011e-06	#N/A	14	14	14	Artery_Tibial
ENSG00000104884.14	ERCC2	-6.32396	-0.163479	2.54936e-10	0.00322467	0.0501312	1.09893e-06	#N/A	10	10	10	Artery_Tibial
ENSG00000090273.13	NUDC	-6.32026	-0.118939	2.61128e-10	0.00523747	0.0829119	1.75748e-10	#N/A	40	41	41	Artery_Tibial
ENSG00000165915.13	SLC39A13	6.32007	0.11697	2.61445e-10	0.00499261	0.116806	2.61435e-14	#N/A	19	19	19	Artery_Tibial
ENSG00000175489.9	LRRC25	-6.31745	-0.183163	2.65921e-10	0.00257352	0.042477	7.72191e-06	#N/A	16	16	16	Artery_Tibial
ENSG00000168806.7	LCMT2	-6.27765	-0.0984403	3.43733e-10	0.00787005	0.0830262	2.13162e-10	#N/A	8	8	8	Artery_Tibial
ENSG00000243509.4	TNFRSF6B	6.26809	0.157247	3.65502e-10	0.00318771	0.0271144	0.00035592	#N/A	16	16	16	Artery_Tibial
ENSG00000233393.1	AP000688.29	6.24829	0.0745367	4.14973e-10	0.0180871	0.0949206	6.94174e-12	#N/A	5	5	5	Artery_Tibial
ENSG00000178425.13	NT5DC1	-6.24281	-0.0668722	4.29778e-10	0.0146081	0.185395	6.24686e-23	#N/A	45	45	45	Artery_Tibial
ENSG00000162613.16	FUBP1	-6.22524	-0.142593	4.80832e-10	0.00325195	0.119564	7.87667e-15	#N/A	13	14	14	Artery_Tibial
ENSG00000090060.17	PAPOLA	-6.21573	-0.301431	5.10878e-10	0.00086648	0.0217343	0.00146195	#N/A	11	11	11	Artery_Tibial
ENSG00000226686.7	LINC01535	6.20173	0.0172606	5.58444e-10	0.262496	0.558685	3.10121e-95	#N/A	34	34	34	Artery_Tibial
ENSG00000176194.17	CIDEA	-6.20031	-0.0854938	5.63529e-10	0.0111215	0.0267357	0.000414605	#N/A	30	30	30	Artery_Tibial
ENSG00000263002.7	ZNF234	-6.18843	-0.11053	6.07677e-10	0.00646207	0.0864764	7.58776e-11	#N/A	6	6	6	Artery_Tibial
ENSG00000255046.1	RP11-297N6.4	-6.1879	-0.104533	6.09694e-10	0.00801163	0.0262875	0.000323918	#N/A	5	5	5	Artery_Tibial
ENSG00000263001.5	GTF2I	-6.18383	-0.0720523	6.25642e-10	0.0189474	0.228639	6.93346e-29	#N/A	15	16	16	Artery_Tibial
ENSG00000130511.15	SSBP4	-6.17885	-0.106322	6.45689e-10	0.00698178	0.0505437	9.10924e-07	#N/A	28	28	28	Artery_Tibial
ENSG00000125618.16	PAX8	6.17869	0.019214	6.46365e-10	0.168343	0.357971	3.11633e-50	#N/A	42	43	43	Artery_Tibial
ENSG00000167077.12	MEI1	6.14111	0.0427568	8.19463e-10	0.0441202	0.164928	9.79117e-21	#N/A	48	50	50	Artery_Tibial
ENSG00000084764.10	MAPRE3	-6.13408	-0.205174	8.56537e-10	0.00196352	0.0184958	0.00336746	#N/A	9	9	9	Artery_Tibial
ENSG00000153214.9	TMEM87B	-6.12738	-0.0563823	8.93386e-10	0.0251453	0.12622	1.73668e-15	#N/A	38	38	38	Artery_Tibial
ENSG00000145040.3	UCN2	6.10411	0.269604	1.03378e-09	0.00110677	0.014231	0.0100168	#N/A	2	3	3	Artery_Tibial
ENSG00000179344.16	HLA-DQB1	-6.09151	-0.020644	1.11852e-09	0.16599	0.596149	2.96051e-108	#N/A	35	39	39	Artery_Tibial
ENSG00000213676.10	ATF6B	6.08364	0.0692791	1.17487e-09	0.0198647	0.177043	3.04686e-22	#N/A	26	26	26	Artery_Tibial
ENSG00000112514.15	CUTA	-6.04726	-0.13198	1.47331e-09	0.0041205	0.0814597	2.10195e-10	#N/A	43	44	44	Artery_Tibial
ENSG00000083312.17	TNPO1	-6.04697	-0.351639	1.47594e-09	0.000678865	0.0120749	0.017946	#N/A	13	13	13	Artery_Tibial
ENSG00000008300.16	CELSR3	6.03513	0.0983206	1.58831e-09	0.00734887	0.0431901	5.96477e-06	#N/A	14	14	14	Artery_Tibial
ENSG00000088543.14	C3orf18	5.96914	0.276285	2.38512e-09	0.000995864	0.0101079	0.0277175	#N/A	14	14	14	Artery_Tibial
ENSG00000196993.8	NPIPB9	-5.96815	-0.029461	2.39954e-09	0.0852626	0.198575	6.57757e-25	#N/A	7	7	7	Artery_Tibial
ENSG00000125510.15	OPRL1	-5.96785	-0.0537893	2.40401e-09	0.0250853	0.182577	6.85521e-23	#N/A	12	12	12	Artery_Tibial
ENSG00000257218.5	GATC	-5.95649	-0.0394524	2.57707e-09	0.0596551	0.371488	1.35436e-52	#N/A	52	53	53	Artery_Tibial
ENSG00000158104.11	HPD	-5.94407	-0.10583	2.78033e-09	0.00780906	0.0739494	1.26917e-09	#N/A	21	22	22	Artery_Tibial
ENSG00000197457.9	STMN3	-5.93485	-0.250443	2.94121e-09	0.00126961	0.0189529	0.00289407	#N/A	14	15	15	Artery_Tibial
ENSG00000010310.8	GIPR	5.92118	0.103904	3.19643e-09	0.0100065	0.0221888	0.00132467	#N/A	40	40	40	Artery_Tibial
ENSG00000204536.13	CCHCR1	-5.92108	-0.0271428	3.19825e-09	0.0941601	0.361989	1.00059e-50	#N/A	142	147	147	Artery_Tibial
ENSG00000198586.13	TLK1	5.9163	0.118349	3.29273e-09	0.00480211	0.0836443	1.1749e-10	#N/A	18	18	18	Artery_Tibial
ENSG00000080815.18	PSEN1	-5.88245	-0.217382	4.0425e-09	0.00164269	0.0453229	3.13463e-06	#N/A	5	5	5	Artery_Tibial
ENSG00000254772.9	EEF1G	5.87738	0.0894974	4.16823e-09	0.00850556	0.168141	6.22746e-21	#N/A	10	10	10	Artery_Tibial
ENSG00000154328.15	NEIL2	5.83962	0.038787	5.23188e-09	0.0520661	0.188515	1.89958e-23	#N/A	67	70	70	Artery_Tibial
ENSG00000087157.18	PGS1	-5.82567	-0.171487	5.68853e-09	0.00205433	0.0353061	4.58916e-05	#N/A	15	15	15	Artery_Tibial
ENSG00000174744.13	BRMS1	-5.78901	-0.196941	7.08024e-09	0.00194495	0.0387493	2.02316e-05	#N/A	30	31	31	Artery_Tibial
ENSG00000178467.17	P4HTM	5.78714	0.104121	7.1594e-09	0.00600634	0.0510486	7.88675e-07	#N/A	42	43	43	Artery_Tibial
ENSG00000134802.17	SLC43A3	-5.77284	-0.15491	7.79447e-09	0.00291599	0.0119859	0.0179598	#N/A	35	35	35	Artery_Tibial
ENSG00000175213.2	ZNF408	5.77243	0.0698212	7.81374e-09	0.0142254	0.0685052	8.78981e-09	#N/A	25	28	28	Artery_Tibial
ENSG00000225399.4	RP11-3B7.1	5.75452	0.0296802	8.68859e-09	0.0803874	0.152219	8.84745e-19	#N/A	53	56	56	Artery_Tibial
ENSG00000143537.13	ADAM15	-5.74118	-0.131821	9.40174e-09	0.00383285	0.0132711	0.0129363	#N/A	41	42	42	Artery_Tibial
ENSG00000198502.5	HLA-DRB5	-5.74043	-0.0177812	9.44343e-09	0.227699	0.717532	1.21315e-156	#N/A	56	60	60	Artery_Tibial
ENSG00000137411.16	VARS2	5.73618	0.0264114	9.68334e-09	0.109289	0.505097	5.47482e-81	#N/A	89	92	92	Artery_Tibial
ENSG00000093167.17	LRRFIP2	-5.72972	-0.100868	1.00594e-08	0.00634455	0.114181	3.71136e-14	#N/A	25	25	25	Artery_Tibial
ENSG00000270210.1	RP11-373D23.3	5.65472	0.0838717	1.561e-08	0.00857338	0.116812	1.65575e-14	#N/A	21	21	21	Artery_Tibial
ENSG00000204516.9	MICB	-5.64945	-0.0138851	1.60962e-08	0.282812	0.611422	9.34177e-114	#N/A	87	90	90	Artery_Tibial
ENSG00000117877.10	CD3EAP	-5.64401	-0.188516	1.66136e-08	0.00225957	0.043421	5.92532e-06	#N/A	4	4	4	Artery_Tibial
ENSG00000228022.5	HCG20	5.63385	0.0562809	1.76228e-08	0.019806	0.0825006	1.78047e-10	#N/A	23	23	23	Artery_Tibial
ENSG00000204308.7	RNF5	5.62865	0.0778931	1.81622e-08	0.0094241	0.083659	9.40214e-11	#N/A	57	59	59	Artery_Tibial
ENSG00000142233.11	NTN5	5.56402	0.0611658	2.63629e-08	0.0178451	0.078182	6.73089e-10	#N/A	38	39	39	Artery_Tibial
ENSG00000133275.15	CSNK1G2	5.53332	0.252671	3.14228e-08	0.000920083	0.0339992	6.62891e-05	#N/A	6	6	6	Artery_Tibial
ENSG00000181444.12	ZNF467	-5.52916	-0.0724665	3.21761e-08	0.0122195	0.105685	3.63784e-13	#N/A	26	26	26	Artery_Tibial
ENSG00000149480.6	MTA2	5.52007	0.189975	3.38872e-08	0.00166081	0.0408464	7.96388e-06	#N/A	14	14	14	Artery_Tibial
ENSG00000185909.14	KLHDC8B	-5.50893	-0.125175	3.61017e-08	0.00415008	0.02745	0.000322385	#N/A	34	34	34	Artery_Tibial
ENSG00000129219.13	PLD2	5.47869	0.0524959	4.28489e-08	0.019543	0.240094	3.82288e-31	#N/A	38	38	38	Artery_Tibial
ENSG00000203880.11	PCMTD2	5.47436	0.0463314	4.39104e-08	0.0277134	0.186713	2.6564e-23	#N/A	72	73	73	Artery_Tibial
ENSG00000187775.16	DNAH17	-5.44914	-0.0696145	5.06134e-08	0.0117899	0.100624	9.16509e-13	#N/A	13	13	13	Artery_Tibial
ENSG00000115590.13	IL1R2	-5.44472	-0.113106	5.18882e-08	0.00411839	0.0144776	0.00946519	#N/A	31	31	31	Artery_Tibial
ENSG00000175115.11	PACS1	-5.41289	-0.243539	6.20162e-08	0.00125384	0.042855	6.73101e-06	#N/A	13	13	13	Artery_Tibial
ENSG00000172292.14	CERS6	5.40946	0.0712277	6.32135e-08	0.0110042	0.0857098	6.53252e-11	#N/A	31	31	31	Artery_Tibial
ENSG00000134905.16	CARS2	5.39736	0.035599	6.76296e-08	0.0483286	0.300849	7.70145e-40	#N/A	37	38	38	Artery_Tibial
ENSG00000274414.1	RP5-965G21.4	-5.3741	-0.0394534	7.69652e-08	0.0325997	0.0508531	6.36741e-07	#N/A	82	82	82	Artery_Tibial
ENSG00000244219.6	GS1-259H13.2	5.37346	0.0821845	7.72421e-08	0.012384	0.0819221	2.47173e-10	#N/A	18	18	18	Artery_Tibial
ENSG00000124562.9	SNRPC	-5.35817	-0.158006	8.40695e-08	0.00222256	0.0778542	5.55853e-10	#N/A	34	35	35	Artery_Tibial
ENSG00000111711.9	GOLT1B	5.3549	0.174177	8.56039e-08	0.00198678	0.0577719	9.9613e-08	#N/A	14	15	15	Artery_Tibial
ENSG00000198373.12	WWP2	5.35068	0.108056	8.76249e-08	0.00512638	0.0597358	7.68746e-08	#N/A	21	21	21	Artery_Tibial
ENSG00000196220.15	SRGAP3	5.34951	0.0261538	8.8191e-08	0.0873877	0.286814	5.18824e-38	#N/A	45	45	45	Artery_Tibial
ENSG00000241468.7	ATP5J2	5.33319	0.221617	9.65003e-08	0.00131674	0.0576186	1.60804e-07	#N/A	12	12	12	Artery_Tibial
ENSG00000184381.18	PLA2G6	5.31956	0.0979522	1.04021e-07	0.00604604	0.0978819	3.96729e-12	#N/A	14	15	15	Artery_Tibial
ENSG00000236104.2	ZBTB22	5.31787	0.153437	1.04991e-07	0.00234277	0.0637946	2.11982e-08	#N/A	10	10	10	Artery_Tibial
ENSG00000176903.4	PNMA1	-5.31561	-0.131013	1.06302e-07	0.00331864	0.0646519	1.89054e-08	#N/A	20	20	20	Artery_Tibial
ENSG00000146109.4	ABT1	5.30679	0.125518	1.11572e-07	0.003765	0.043832	4.68193e-06	#N/A	27	28	28	Artery_Tibial
ENSG00000187105.8	HEATR4	-5.30051	-0.0239228	1.15481e-07	0.0921784	0.219543	1.1107e-27	#N/A	46	46	46	Artery_Tibial
ENSG00000125458.6	NT5C	-5.28157	-0.0841475	1.28083e-07	0.00827032	0.127318	1.10092e-15	#N/A	22	22	22	Artery_Tibial
ENSG00000125611.15	CHCHD5	-5.26526	-0.106426	1.39995e-07	0.00582735	0.114971	4.28362e-14	#N/A	22	22	22	Artery_Tibial
ENSG00000244731.7	C4A	5.26188	0.0248277	1.42592e-07	0.0477019	0.205167	1.47184e-25	#N/A	55	55	55	Artery_Tibial
ENSG00000196275.13	GTF2IRD2	-5.25738	-0.0265612	1.46126e-07	0.0964886	0.533565	3.87592e-89	#N/A	14	16	16	Artery_Tibial
ENSG00000196419.12	XRCC6	-5.25191	-0.190158	1.50533e-07	0.00155759	0.0357912	3.32386e-05	#N/A	18	18	18	Artery_Tibial
ENSG00000140374.15	ETFA	5.24652	0.0950527	1.54997e-07	0.00523095	0.0717214	3.97893e-09	#N/A	15	15	15	Artery_Tibial
ENSG00000166529.14	ZSCAN21	-5.24362	-0.0462358	1.57455e-07	0.0275485	0.137739	3.28763e-17	#N/A	18	18	18	Artery_Tibial
ENSG00000137312.14	FLOT1	-5.24222	-0.115461	1.58657e-07	0.00356633	0.0558731	2.421e-07	#N/A	63	63	63	Artery_Tibial
ENSG00000065060.16	UHRF1BP1	5.23487	0.0231107	1.65104e-07	0.0999086	0.510514	2.51158e-82	#N/A	73	73	73	Artery_Tibial
ENSG00000114735.9	HEMK1	-5.22958	-0.149557	1.69893e-07	0.00272402	0.0630972	3.75295e-08	#N/A	19	19	19	Artery_Tibial
ENSG00000160679.12	CHTOP	5.2224	0.0749135	1.76623e-07	0.0112439	0.0624816	3.2077e-08	#N/A	37	38	38	Artery_Tibial
ENSG00000198740.8	ZNF652	-5.2167	-0.0799499	1.82142e-07	0.00709846	0.0569276	1.81978e-07	#N/A	16	18	18	Artery_Tibial
ENSG00000204531.17	POU5F1	-5.20895	-0.0174629	1.89917e-07	0.185739	0.409464	6.71388e-60	#N/A	90	91	91	Artery_Tibial
ENSG00000198218.10	QRICH1	-5.20056	-0.127193	1.9869e-07	0.00352607	0.0621825	4.27542e-08	#N/A	22	22	22	Artery_Tibial
ENSG00000122484.8	RPAP2	5.19787	0.13147	2.01582e-07	0.0031601	0.0229102	0.000998348	#N/A	27	27	27	Artery_Tibial
ENSG00000082701.14	GSK3B	5.18909	0.0656415	2.11324e-07	0.0129548	0.166928	4.11e-21	#N/A	36	36	36	Artery_Tibial
ENSG00000100417.11	PMM1	-5.15895	-0.119064	2.48338e-07	0.00369216	0.0970922	4.16754e-12	#N/A	16	16	16	Artery_Tibial
ENSG00000165689.16	SDCCAG3	-5.15855	-0.0659448	2.48868e-07	0.0175523	0.184748	5.51996e-23	#N/A	53	64	64	Artery_Tibial
ENSG00000235358.1	RP11-399E6.1	-5.15213	-0.0194386	2.57538e-07	0.122459	0.212553	4.59989e-27	#N/A	57	57	57	Artery_Tibial
ENSG00000076201.14	PTPN23	-5.13899	-0.120393	2.76219e-07	0.00346303	0.0718287	3.7067e-09	#N/A	13	13	13	Artery_Tibial
ENSG00000187796.13	CARD9	-5.12034	-0.0884947	3.0498e-07	0.0080046	0.0518997	6.12281e-07	#N/A	28	36	36	Artery_Tibial
ENSG00000204469.12	PRRC2A	-5.09712	-0.478449	3.44867e-07	0.000258652	0.022737	0.00107631	#N/A	7	7	7	Artery_Tibial
ENSG00000106290.14	TAF6	-5.09661	-0.0942259	3.45789e-07	0.00560853	0.0465648	2.62041e-06	#N/A	30	30	30	Artery_Tibial
ENSG00000120265.16	PCMT1	5.09624	0.0995705	3.46474e-07	0.00505419	0.129965	2.35259e-16	#N/A	25	25	25	Artery_Tibial
ENSG00000170581.13	STAT2	5.09521	0.466632	3.48353e-07	0.000292466	0.0145701	0.00868036	#N/A	2	2	2	Artery_Tibial
ENSG00000197114.11	ZGPAT	5.09432	0.335287	3.5e-07	0.00034823	0.0156494	0.00693383	#N/A	1	1	1	Artery_Tibial
ENSG00000049759.17	NEDD4L	-5.07757	-0.0515319	3.82287e-07	0.0188762	0.130993	2.65458e-16	#N/A	55	55	55	Artery_Tibial
ENSG00000170468.7	RIOX1	-5.07369	-0.158069	3.90173e-07	0.00205447	0.0622646	4.47395e-08	#N/A	3	3	3	Artery_Tibial
ENSG00000149489.8	ROM1	5.06264	0.0673741	4.13486e-07	0.0104807	0.12465	1.28765e-15	#N/A	18	18	18	Artery_Tibial
ENSG00000146112.11	PPP1R18	5.05884	0.0599423	4.21807e-07	0.0104835	0.0998754	2.24716e-12	#N/A	43	43	43	Artery_Tibial
ENSG00000188227.12	ZNF793	-5.05685	-0.219472	4.26228e-07	0.0011663	0.0154784	0.00722802	#N/A	18	18	18	Artery_Tibial
ENSG00000176697.18	BDNF	5.04371	0.144125	4.56594e-07	0.00233886	0.0257397	0.000532095	#N/A	9	9	9	Artery_Tibial
ENSG00000240972.1	MIF	5.03937	0.0125008	4.67061e-07	0.313916	0.50527	9.28084e-81	#N/A	40	40	40	Artery_Tibial
ENSG00000213246.6	SUPT4H1	5.03211	0.0750769	4.85101e-07	0.00785182	0.132278	3.75257e-16	#N/A	17	17	17	Artery_Tibial
ENSG00000133243.8	BTBD2	-5.03146	-0.0550597	4.86758e-07	0.0157557	0.138774	3.74308e-17	#N/A	42	43	43	Artery_Tibial
ENSG00000172543.7	CTSW	-5.02832	-0.0312827	4.94806e-07	0.0536814	0.235512	3.97941e-32	#N/A	17	17	17	Artery_Tibial
ENSG00000137804.12	NUSAP1	4.98744	0.0646112	6.11858e-07	0.0121671	0.0504592	8.26756e-07	#N/A	15	15	15	Artery_Tibial
ENSG00000151640.12	DPYSL4	4.97662	0.014654	6.4703e-07	0.273946	0.52625	3.11553e-88	#N/A	43	43	43	Artery_Tibial
ENSG00000174306.21	ZHX3	-4.97545	-0.0939846	6.50953e-07	0.00508812	0.0125617	0.0160842	#N/A	45	45	45	Artery_Tibial
ENSG00000198265.11	HELZ	4.97252	0.214255	6.60894e-07	0.00128826	0.0423729	6.97471e-06	#N/A	9	9	9	Artery_Tibial
ENSG00000273295.1	AP000350.5	4.97141	0.0118254	6.64662e-07	0.341201	0.637275	4.3408e-122	#N/A	63	63	63	Artery_Tibial
ENSG00000244165.1	P2RY11	4.95355	0.043653	7.2871e-07	0.0312863	0.221601	3.38455e-28	#N/A	75	75	75	Artery_Tibial
ENSG00000134825.15	TMEM258	-4.95126	-0.154896	7.37341e-07	0.00206506	0.0622835	4.93431e-08	#N/A	7	7	7	Artery_Tibial
ENSG00000111713.2	GYS2	4.94953	0.0510806	7.43911e-07	0.0218771	0.084671	1.15855e-10	#N/A	58	60	60	Artery_Tibial
ENSG00000188603.18	CLN3	4.94688	0.156163	7.54137e-07	0.0017872	0.0255863	0.000536121	#N/A	25	26	26	Artery_Tibial
ENSG00000114988.11	LMAN2L	4.93649	0.0764091	7.95402e-07	0.00764578	0.111985	9.65967e-14	#N/A	36	38	38	Artery_Tibial
ENSG00000128604.19	IRF5	4.93523	0.0525639	8.0058e-07	0.01891	0.179594	2.21602e-22	#N/A	25	25	25	Artery_Tibial
ENSG00000140326.12	CDAN1	-4.93115	-0.149455	8.17481e-07	0.00241446	0.0505033	9.56396e-07	#N/A	12	12	12	Artery_Tibial
ENSG00000188186.10	LAMTOR4	-4.92414	-0.163651	8.47317e-07	0.00197363	0.0332677	6.72235e-05	#N/A	16	16	16	Artery_Tibial
ENSG00000166582.9	CENPV	-4.92341	-0.014952	8.505e-07	0.188005	0.46669	1.61724e-71	#N/A	38	38	38	Artery_Tibial
ENSG00000108474.16	PIGL	-4.92092	-0.113332	8.61374e-07	0.00317119	0.0922279	1.26114e-11	#N/A	12	12	12	Artery_Tibial
ENSG00000099974.7	DDTL	-4.91711	-0.0148432	8.78326e-07	0.214716	0.430964	1.11306e-63	#N/A	39	40	40	Artery_Tibial
ENSG00000091436.16	MAP3K20	-4.91521	-0.16932	8.86857e-07	0.00156708	0.0209219	0.00176312	#N/A	11	11	11	Artery_Tibial
ENSG00000139579.12	NABP2	-4.89594	-0.531763	9.78384e-07	0.000210494	0.0257318	0.000527109	#N/A	2	2	2	Artery_Tibial
ENSG00000184939.15	ZFP90	4.88227	0.0646399	1.0487e-06	0.0106626	0.0489503	7.6009e-07	#N/A	40	41	41	Artery_Tibial
ENSG00000015475.18	BID	-4.8706	-0.0954965	1.11259e-06	0.00641693	0.0785944	6.90673e-10	#N/A	7	7	7	Artery_Tibial
ENSG00000243789.10	JMJD7	4.86173	0.065003	1.16367e-06	0.0125159	0.116077	1.69788e-14	#N/A	37	38	38	Artery_Tibial
ENSG00000205710.3	C17orf107	4.85715	0.0193619	1.1909e-06	0.132702	0.407337	9.8462e-59	#N/A	19	19	19	Artery_Tibial
ENSG00000149932.16	TMEM219	-4.85675	-0.401156	1.1933e-06	0.000296803	0.014632	0.00910579	#N/A	7	7	7	Artery_Tibial
ENSG00000172336.4	POP7	-4.85216	-0.129637	1.22123e-06	0.00225871	0.0147092	0.00833855	#N/A	59	59	59	Artery_Tibial
ENSG00000072682.18	P4HA2	4.85207	0.0448536	1.22181e-06	0.0225021	0.257942	2.35176e-33	#N/A	28	30	30	Artery_Tibial
ENSG00000100395.14	L3MBTL2	4.84433	0.0865317	1.2704e-06	0.00554732	0.0525331	5.34009e-07	#N/A	18	18	18	Artery_Tibial
ENSG00000109758.8	HGFAC	4.84117	0.0660678	1.29079e-06	0.0133027	0.0333947	7.74586e-05	#N/A	22	22	22	Artery_Tibial
ENSG00000206053.12	HN1L	-4.82048	-0.0364961	1.43217e-06	0.0356963	0.0972637	3.63241e-12	#N/A	65	65	65	Artery_Tibial
ENSG00000155542.11	SETD9	4.81641	0.0142166	1.46163e-06	0.246523	0.596696	3.97123e-107	#N/A	26	26	26	Artery_Tibial
ENSG00000170291.14	ELP5	-4.80145	-0.0326738	1.57522e-06	0.043989	0.225709	5.68151e-29	#N/A	54	59	59	Artery_Tibial
ENSG00000063176.15	SPHK2	-4.79564	-0.241361	1.62155e-06	0.000929283	0.0398252	1.44368e-05	#N/A	4	4	4	Artery_Tibial
ENSG00000197586.12	ENTPD6	-4.79517	-0.0512692	1.62537e-06	0.0182533	0.223528	7.52987e-29	#N/A	23	23	23	Artery_Tibial
ENSG00000117500.12	TMED5	4.79278	0.2042	1.64485e-06	0.00119539	0.0162583	0.00592255	#N/A	35	36	36	Artery_Tibial
ENSG00000198453.12	ZNF568	-4.79235	-0.0577406	1.64842e-06	0.0153841	0.0687269	8.56274e-09	#N/A	21	21	21	Artery_Tibial
ENSG00000186407.6	CD300E	4.77988	0.189916	1.75398e-06	0.00141947	0.0114063	0.0216919	#N/A	6	6	6	Artery_Tibial
ENSG00000099977.13	DDT	4.76704	0.0360717	1.8695e-06	0.036439	0.302738	7.694e-41	#N/A	15	15	15	Artery_Tibial
ENSG00000204682.5	CASC10	4.76414	0.0935789	1.89656e-06	0.00585313	0.0527946	5.16409e-07	#N/A	11	11	11	Artery_Tibial
ENSG00000248144.5	ADH1C	-4.75854	-0.0543938	1.94996e-06	0.0170113	0.124603	1.48188e-15	#N/A	57	59	59	Artery_Tibial
ENSG00000104936.17	DMPK	4.75724	0.0983881	1.96259e-06	0.00551517	0.115242	4.08916e-14	#N/A	25	25	25	Artery_Tibial
ENSG00000183793.13	NPIPA5	4.74454	0.021808	2.08985e-06	0.103239	0.480282	8.1925e-75	#N/A	70	82	82	Artery_Tibial
ENSG00000101460.12	MAP1LC3A	-4.73932	-0.0449852	2.14439e-06	0.0201357	0.27869	5.93266e-37	#N/A	15	16	16	Artery_Tibial
ENSG00000108556.7	CHRNE	4.73704	0.0147862	2.16861e-06	0.217182	0.448603	5.61834e-68	#N/A	17	17	17	Artery_Tibial
ENSG00000223496.2	EXOSC6	-4.72895	-0.0129171	2.25681e-06	0.271163	0.689427	6.46185e-145	#N/A	19	19	19	Artery_Tibial
ENSG00000103197.16	TSC2	4.71722	0.115053	2.39092e-06	0.00333444	0.07647	1.19061e-09	#N/A	23	23	23	Artery_Tibial
ENSG00000176171.11	BNIP3	4.71563	0.173768	2.40965e-06	0.00154987	0.0481107	1.89742e-06	#N/A	4	4	4	Artery_Tibial
ENSG00000060642.10	PIGV	4.7111	0.0878958	2.46387e-06	0.00464263	0.059581	9.02772e-08	#N/A	37	37	37	Artery_Tibial
ENSG00000160785.13	SLC25A44	4.70368	0.0566479	2.55515e-06	0.0142132	0.124436	2.7149e-15	#N/A	39	39	39	Artery_Tibial
ENSG00000181315.10	ZNF322	-4.69953	-0.0217391	2.60757e-06	0.106347	0.420738	2.47238e-62	#N/A	71	73	73	Artery_Tibial
ENSG00000101639.18	CEP192	-4.69698	-0.0163315	2.64032e-06	0.169868	0.583585	4.81899e-103	#N/A	22	22	22	Artery_Tibial
ENSG00000168016.13	TRANK1	4.69232	0.0732911	2.70123e-06	0.00705235	0.0367029	2.99089e-05	#N/A	50	50	50	Artery_Tibial
ENSG00000214022.11	REPIN1	-4.68358	-0.0857459	2.81907e-06	0.00612933	0.10438	5.89503e-13	#N/A	12	12	12	Artery_Tibial
ENSG00000169592.14	INO80E	-4.68079	-0.0388169	2.85769e-06	0.0313743	0.265925	2.90241e-36	#N/A	23	23	23	Artery_Tibial
ENSG00000183336.8	BOLA2	-4.6762	-0.0283907	2.92233e-06	0.0541018	0.135948	8.44292e-17	#N/A	15	16	16	Artery_Tibial
ENSG00000135269.17	TES	-4.66863	-0.0765566	3.03222e-06	0.00684108	0.0687371	7.29791e-09	#N/A	26	26	26	Artery_Tibial
ENSG00000158113.12	LRRC43	-4.6586	-0.0467431	3.1837e-06	0.0231303	0.0714548	4.14608e-09	#N/A	8	8	8	Artery_Tibial
ENSG00000073614.12	KDM5A	-4.65437	-0.0924256	3.24966e-06	0.00548795	0.107733	3.16954e-13	#N/A	17	17	17	Artery_Tibial
ENSG00000142949.16	PTPRF	4.65297	0.126184	3.27187e-06	0.00240845	0.0578762	1.47353e-07	#N/A	9	9	9	Artery_Tibial
ENSG00000116406.18	EDEM3	-4.64755	-0.0437652	3.35896e-06	0.024298	0.294904	6.2845e-39	#N/A	31	31	31	Artery_Tibial
ENSG00000164535.14	DAGLB	-4.64567	-0.0311977	3.38972e-06	0.0387997	0.296459	1.59259e-39	#N/A	14	15	15	Artery_Tibial
ENSG00000110395.6	CBL	4.64532	0.0983525	3.39549e-06	0.00467036	0.139845	1.62607e-17	#N/A	28	28	28	Artery_Tibial
ENSG00000187741.14	FANCA	-4.64375	-0.0210483	3.42141e-06	0.0923625	0.307669	7.61492e-41	#N/A	24	24	24	Artery_Tibial
ENSG00000164053.19	ATRIP	-4.6393	-0.0744468	3.49598e-06	0.00814092	0.0433848	4.67521e-06	#N/A	12	12	12	Artery_Tibial
ENSG00000213689.11	TREX1	-4.63736	-0.0594527	3.52885e-06	0.0116413	0.129316	6.99141e-16	#N/A	22	26	26	Artery_Tibial
ENSG00000175315.2	CST6	-4.63662	-0.0753183	3.54159e-06	0.00849775	0.0809628	2.76465e-10	#N/A	35	35	35	Artery_Tibial
ENSG00000174684.6	B4GAT1	-4.6287	-0.076086	3.67974e-06	0.00792313	0.0863034	9.05263e-11	#N/A	18	18	18	Artery_Tibial
ENSG00000111801.15	BTN3A3	4.62412	0.113315	3.76199e-06	0.00308697	0.0650714	2.39227e-08	#N/A	49	52	52	Artery_Tibial
ENSG00000117407.16	ARTN	4.60483	0.0860659	4.12807e-06	0.0061674	0.0229175	0.00106383	#N/A	38	38	38	Artery_Tibial
ENSG00000062524.15	LTK	-4.60361	-0.10963	4.15223e-06	0.00424612	0.0473247	1.65323e-06	#N/A	6	6	6	Artery_Tibial
ENSG00000129003.15	VPS13C	-4.58878	-0.102702	4.45853e-06	0.00412782	0.0676231	9.60882e-09	#N/A	18	18	18	Artery_Tibial
ENSG00000007312.12	CD79B	-4.5871	-0.0698828	4.49445e-06	0.00986911	0.0475297	1.82731e-06	#N/A	50	50	50	Artery_Tibial
ENSG00000184492.6	FOXD4L1	4.5655	0.0801914	4.98306e-06	0.0060452	0.0106023	0.0269082	#N/A	7	8	8	Artery_Tibial
ENSG00000138074.14	SLC5A6	4.55434	0.044229	5.25504e-06	0.0245016	0.151481	4.8051e-19	#N/A	59	62	62	Artery_Tibial
ENSG00000159231.5	CBR3	4.54896	0.0776501	5.39126e-06	0.00714372	0.0934434	1.13995e-11	#N/A	20	29	29	Artery_Tibial
ENSG00000267605.5	CTD-3220F14.1	-4.54611	-0.0423208	5.46468e-06	0.0247644	0.048104	1.42616e-06	#N/A	23	23	23	Artery_Tibial
ENSG00000102882.11	MAPK3	-4.54272	-0.121378	5.55327e-06	0.0028999	0.0597786	8.59706e-08	#N/A	6	6	6	Artery_Tibial
ENSG00000160716.5	CHRNB2	-36.6822	-7.05834	1.4048e-294	5.81321e-05	0.0241362	0.0490259	#N/A	10	10	10	Brain_Caudate_basal_ganglia
ENSG00000115234.10	SNX17	-21.5756	-0.71711	3.04615e-103	0.00194125	0.0869085	0.000139091	#N/A	7	7	7	Brain_Caudate_basal_ganglia
ENSG00000073008.14	PVR	18.4044	0.383244	1.21008e-75	0.00428235	0.0272057	0.034483	#N/A	22	22	22	Brain_Caudate_basal_ganglia
ENSG00000179639.10	FCER1A	-18.262	-0.296113	1.65948e-74	0.00741695	0.0664134	0.000933412	#N/A	12	13	13	Brain_Caudate_basal_ganglia
ENSG00000157837.15	SPPL3	18.0958	0.196782	3.43653e-73	0.0330859	0.130621	1.56821e-06	#N/A	60	61	61	Brain_Caudate_basal_ganglia
ENSG00000157992.12	KRTCAP3	-16.2308	-0.112005	3.05573e-59	0.044904	0.100068	3.23973e-05	#N/A	44	44	44	Brain_Caudate_basal_ganglia
ENSG00000184949.15	FAM227A	-14.1891	-0.334886	1.07034e-45	0.00366958	0.133973	8.35112e-07	#N/A	6	6	6	Brain_Caudate_basal_ganglia
ENSG00000237541.3	HLA-DQA2	14.1473	0.0434325	1.94141e-45	0.205679	0.438278	1.00444e-23	#N/A	42	42	42	Brain_Caudate_basal_ganglia
ENSG00000162434.11	JAK1	13.2037	0.229695	8.35087e-40	0.00744391	0.0573381	0.0020156	#N/A	48	48	48	Brain_Caudate_basal_ganglia
ENSG00000204525.16	HLA-C	-12.2385	-0.0584965	1.93542e-34	0.0912577	0.433922	3.71067e-23	#N/A	70	70	70	Brain_Caudate_basal_ganglia
ENSG00000204371.11	EHMT2	11.7292	0.187439	9.03608e-32	0.00866378	0.168817	4.68399e-08	#N/A	11	11	11	Brain_Caudate_basal_ganglia
ENSG00000196126.11	HLA-DRB1	-11.6879	-0.0753389	1.46993e-31	0.0462417	0.398721	1.3297e-20	#N/A	54	57	57	Brain_Caudate_basal_ganglia
ENSG00000116675.15	DNAJC6	-11.1601	-0.757318	6.39062e-29	0.000375508	0.0293189	0.0317747	#N/A	12	13	13	Brain_Caudate_basal_ganglia
ENSG00000240053.8	LY6G5B	-10.927	-0.142526	8.55934e-28	0.012734	0.133434	9.33008e-07	#N/A	39	42	42	Brain_Caudate_basal_ganglia
ENSG00000204435.13	CSNK2B	-10.8211	-0.498654	2.73609e-27	0.001023	0.0503819	0.00409173	#N/A	5	5	5	Brain_Caudate_basal_ganglia
ENSG00000204463.12	BAG6	10.3023	0.05262	6.88121e-25	0.0814202	0.360813	3.51622e-18	#N/A	64	65	65	Brain_Caudate_basal_ganglia
ENSG00000165916.8	PSMC3	9.7452	0.19876	1.93394e-22	0.00446678	0.162649	7.32205e-08	#N/A	17	21	21	Brain_Caudate_basal_ganglia
ENSG00000134569.9	LRP4	-9.67849	-0.325193	3.7219e-22	0.00202657	0.0790814	0.000291354	#N/A	9	10	10	Brain_Caudate_basal_ganglia
ENSG00000204536.13	CCHCR1	-9.62828	-0.214735	6.074e-22	0.00386476	0.0246718	0.0399351	#N/A	16	16	16	Brain_Caudate_basal_ganglia
ENSG00000143994.13	ABHD1	-9.5684	-0.196314	1.08568e-21	0.00471716	0.0697966	0.000687596	#N/A	5	5	5	Brain_Caudate_basal_ganglia
ENSG00000116539.12	ASH1L	9.41997	0.131343	4.51236e-21	0.00973521	0.0252327	0.0376886	#N/A	62	63	63	Brain_Caudate_basal_ganglia
ENSG00000213676.10	ATF6B	9.36162	0.151354	7.85204e-21	0.0077894	0.0724706	0.000465003	#N/A	25	26	26	Brain_Caudate_basal_ganglia
ENSG00000182179.12	UBA7	-9.19676	-0.376711	3.6889e-20	0.00113293	0.0561685	0.00252784	#N/A	32	32	32	Brain_Caudate_basal_ganglia
ENSG00000164078.12	MST1R	9.16684	0.108468	4.87097e-20	0.0147968	0.0405405	0.00895742	#N/A	36	36	36	Brain_Caudate_basal_ganglia
ENSG00000004534.14	RBM6	-9.05179	-0.0738169	1.40647e-19	0.0292805	0.28416	1.41792e-14	#N/A	46	46	46	Brain_Caudate_basal_ganglia
ENSG00000186567.12	CEACAM19	-9.01027	-0.059663	2.05557e-19	0.0445866	0.20521	3.76618e-10	#N/A	40	41	41	Brain_Caudate_basal_ganglia
ENSG00000196260.4	SFTA2	8.77999	0.0725924	1.63488e-18	0.0325612	0.127581	2.24663e-06	#N/A	12	13	13	Brain_Caudate_basal_ganglia
ENSG00000165917.9	RAPSN	-8.71957	-0.0425426	2.79262e-18	0.0728233	0.137324	7.98863e-07	#N/A	62	62	62	Brain_Caudate_basal_ganglia
ENSG00000138031.14	ADCY3	-8.50065	-0.19517	1.88528e-17	0.00461163	0.0310666	0.0254829	#N/A	13	13	13	Brain_Caudate_basal_ganglia
ENSG00000089041.16	P2RX7	-8.47455	-0.12866	2.36e-17	0.00810152	0.145348	3.71489e-07	#N/A	42	42	42	Brain_Caudate_basal_ganglia
ENSG00000196683.10	TOMM7	8.29518	0.0844252	1.08418e-16	0.0196711	0.330115	1.04712e-16	#N/A	8	8	8	Brain_Caudate_basal_ganglia
ENSG00000145692.14	BHMT	-8.2622	-0.0563062	1.43011e-16	0.0424998	0.140223	8.14789e-07	#N/A	15	15	15	Brain_Caudate_basal_ganglia
ENSG00000214530.8	STARD10	8.22002	0.0504635	2.03465e-16	0.0532698	0.362016	1.61136e-18	#N/A	41	41	41	Brain_Caudate_basal_ganglia
ENSG00000162729.13	IGSF8	-8.12083	-0.175051	4.63015e-16	0.00767646	0.087575	0.000120615	#N/A	48	49	49	Brain_Caudate_basal_ganglia
ENSG00000204420.8	MPIG6B	-8.04165	-0.0336092	8.86369e-16	0.11738	0.19576	3.4315e-09	#N/A	58	58	58	Brain_Caudate_basal_ganglia
ENSG00000213625.8	LEPROT	-7.99657	-0.0533778	1.27933e-15	0.0374107	0.482318	4.4499e-27	#N/A	22	23	23	Brain_Caudate_basal_ganglia
ENSG00000172247.3	C1QTNF4	-7.94125	-0.134363	2.00153e-15	0.00624948	0.102323	2.72742e-05	#N/A	15	15	15	Brain_Caudate_basal_ganglia
ENSG00000025434.18	NR1H3	-7.92121	-0.181019	2.35207e-15	0.00438028	0.0581988	0.00175193	#N/A	10	10	10	Brain_Caudate_basal_ganglia
ENSG00000062370.16	ZNF112	-7.91853	-0.149811	2.40335e-15	0.00592727	0.0549398	0.00268247	#N/A	21	21	21	Brain_Caudate_basal_ganglia
ENSG00000251417.2	RP11-1348G14.4	-7.81915	-0.0648253	5.31808e-15	0.0283232	0.148551	2.20062e-07	#N/A	12	12	12	Brain_Caudate_basal_ganglia
ENSG00000213699.8	SLC35F6	7.8058	0.135813	5.91265e-15	0.00660582	0.0944521	6.59656e-05	#N/A	28	29	29	Brain_Caudate_basal_ganglia
ENSG00000196502.11	SULT1A1	-7.74415	-0.0532836	9.62227e-15	0.0397111	0.102592	3.37246e-05	#N/A	37	37	37	Brain_Caudate_basal_ganglia
ENSG00000169231.13	THBS3	7.72969	0.0967531	1.07809e-14	0.0125368	0.0258087	0.0414676	#N/A	46	48	48	Brain_Caudate_basal_ganglia
ENSG00000087157.18	PGS1	-7.72232	-0.0813035	1.1423e-14	0.0194793	0.150372	3.21867e-07	#N/A	28	30	30	Brain_Caudate_basal_ganglia
ENSG00000197165.10	SULT1A2	7.53109	0.0298601	5.03185e-14	0.115533	0.268411	9.63233e-14	#N/A	25	25	25	Brain_Caudate_basal_ganglia
ENSG00000204290.10	BTNL2	-7.42523	-0.0379928	1.12587e-13	0.0759397	0.0936108	5.62704e-05	#N/A	50	52	52	Brain_Caudate_basal_ganglia
ENSG00000149177.12	PTPRJ	-7.3459	-0.106011	2.04378e-13	0.00884514	0.037428	0.0127393	#N/A	20	20	20	Brain_Caudate_basal_ganglia
ENSG00000109919.9	MTCH2	7.32242	0.0831404	2.43535e-13	0.0142348	0.206806	6.52009e-10	#N/A	14	14	14	Brain_Caudate_basal_ganglia
ENSG00000233232.6	NPIPB7	-7.29144	-0.0910585	3.06665e-13	0.0116456	0.0564992	0.00251059	#N/A	6	6	6	Brain_Caudate_basal_ganglia
ENSG00000198156.10	NPIPB6	7.26182	0.0843368	3.81906e-13	0.0177353	0.121496	3.03819e-06	#N/A	19	19	19	Brain_Caudate_basal_ganglia
ENSG00000011295.15	TTC19	7.24569	0.0930296	4.30229e-13	0.0103116	0.227744	5.44013e-11	#N/A	26	26	26	Brain_Caudate_basal_ganglia
ENSG00000159917.15	ZNF235	-7.21605	-0.111557	5.35198e-13	0.00822703	0.0957104	4.77506e-05	#N/A	17	17	17	Brain_Caudate_basal_ganglia
ENSG00000206344.7	HCG27	7.11204	0.0341406	1.14339e-12	0.101429	0.316798	1.27376e-15	#N/A	48	48	48	Brain_Caudate_basal_ganglia
ENSG00000178252.17	WDR6	-7.0905	-0.104901	1.33624e-12	0.00899555	0.0746019	0.000366572	#N/A	28	30	30	Brain_Caudate_basal_ganglia
ENSG00000171703.16	TCEA2	7.03204	0.342172	2.03543e-12	0.000906769	0.0291136	0.0259083	#N/A	20	20	20	Brain_Caudate_basal_ganglia
ENSG00000244731.7	C4A	7.00372	0.0429239	2.49246e-12	0.0384261	0.173959	3.15815e-09	#N/A	52	52	52	Brain_Caudate_basal_ganglia
ENSG00000198502.5	HLA-DRB5	-7.00296	-0.0240238	2.50609e-12	0.165488	0.632572	6.74409e-43	#N/A	46	48	48	Brain_Caudate_basal_ganglia
ENSG00000132837.14	DMGDH	-6.98994	-0.0463341	2.75013e-12	0.0406088	0.210791	3.14173e-10	#N/A	48	48	48	Brain_Caudate_basal_ganglia
ENSG00000178952.10	TUFM	6.98064	0.12402	2.93834e-12	0.00635688	0.155012	1.24034e-07	#N/A	33	33	33	Brain_Caudate_basal_ganglia
ENSG00000196993.8	NPIPB9	-6.96526	-0.0444606	3.27799e-12	0.0499713	0.163423	5.16004e-08	#N/A	23	23	23	Brain_Caudate_basal_ganglia
ENSG00000214941.7	ZSWIM7	-6.95171	-0.0390512	3.60896e-12	0.0501494	0.320094	1.96005e-16	#N/A	9	9	9	Brain_Caudate_basal_ganglia
ENSG00000176909.11	MAMSTR	6.93268	0.0743344	4.12931e-12	0.0201321	0.0937341	4.70455e-05	#N/A	20	20	20	Brain_Caudate_basal_ganglia
ENSG00000177352.9	CCDC71	-6.88724	-0.139638	5.68838e-12	0.00523289	0.0838281	0.000177424	#N/A	21	22	22	Brain_Caudate_basal_ganglia
ENSG00000239467.5	AC007405.6	-6.88608	-0.101544	5.73501e-12	0.0102687	0.0587026	0.00179377	#N/A	17	17	17	Brain_Caudate_basal_ganglia
ENSG00000148384.12	INPP5E	-6.88227	-0.0379238	5.89077e-12	0.0752221	0.276625	1.79729e-13	#N/A	33	38	38	Brain_Caudate_basal_ganglia
ENSG00000178425.13	NT5DC1	6.81045	0.125738	9.72931e-12	0.00487916	0.0860161	0.000149593	#N/A	20	20	20	Brain_Caudate_basal_ganglia
ENSG00000227888.4	FAM66A	6.75135	0.0288359	1.46472e-11	0.128968	0.282233	8.60528e-14	#N/A	29	30	30	Brain_Caudate_basal_ganglia
ENSG00000204257.14	HLA-DMA	-6.669	-0.100615	2.57555e-11	0.00506186	0.139865	5.82441e-07	#N/A	13	14	14	Brain_Caudate_basal_ganglia
ENSG00000102882.11	MAPK3	-6.63705	-0.203529	3.20027e-11	0.0023471	0.0717005	0.000551932	#N/A	18	19	19	Brain_Caudate_basal_ganglia
ENSG00000233393.1	AP000688.29	6.59575	0.0510897	4.23116e-11	0.0387496	0.219235	1.1422e-10	#N/A	31	31	31	Brain_Caudate_basal_ganglia
ENSG00000179344.16	HLA-DQB1	-6.56819	-0.0226252	5.09301e-11	0.182244	0.498326	9.09191e-29	#N/A	51	51	51	Brain_Caudate_basal_ganglia
ENSG00000213672.7	NCKIPSD	6.53538	0.0483266	6.34486e-11	0.0411759	0.479322	1.3812e-26	#N/A	40	40	40	Brain_Caudate_basal_ganglia
ENSG00000145029.13	NICN1	-6.52604	-0.0662561	6.753e-11	0.0224894	0.104493	2.22289e-05	#N/A	34	36	36	Brain_Caudate_basal_ganglia
ENSG00000054965.10	FAM168A	6.52115	0.177878	6.97716e-11	0.0025235	0.0261122	0.0412737	#N/A	8	8	8	Brain_Caudate_basal_ganglia
ENSG00000114054.13	PCCB	-6.51203	-0.0800538	7.41436e-11	0.0129578	0.122441	4.29367e-06	#N/A	20	20	20	Brain_Caudate_basal_ganglia
ENSG00000125755.18	SYMPK	-6.4788	-0.0640546	9.24538e-11	0.0194963	0.165278	2.52995e-08	#N/A	76	76	76	Brain_Caudate_basal_ganglia
ENSG00000196666.4	FAM180B	6.42285	0.0685309	1.33747e-10	0.0160622	0.0746483	0.000317036	#N/A	70	70	70	Brain_Caudate_basal_ganglia
ENSG00000152409.8	JMY	-6.38944	-0.071423	1.66494e-10	0.0150045	0.0809857	0.00024064	#N/A	47	48	48	Brain_Caudate_basal_ganglia
ENSG00000152219.4	ARL14EP	-6.36301	-0.116147	1.97841e-10	0.0063189	0.191687	3.97798e-09	#N/A	15	15	15	Brain_Caudate_basal_ganglia
ENSG00000168917.8	SLC35G2	-6.35184	-0.0956646	2.12761e-10	0.00969833	0.124591	2.50813e-06	#N/A	27	27	27	Brain_Caudate_basal_ganglia
ENSG00000166529.14	ZSCAN21	-6.30259	-0.0841767	2.92718e-10	0.0131025	0.100162	2.84726e-05	#N/A	5	5	5	Brain_Caudate_basal_ganglia
ENSG00000261390.5	MAFTRR	-6.29548	-0.0352578	3.06455e-10	0.0684116	0.174377	2.10014e-08	#N/A	24	24	24	Brain_Caudate_basal_ganglia
ENSG00000142233.11	NTN5	6.24035	0.0482277	4.36597e-10	0.0409125	0.140185	8.81736e-07	#N/A	47	47	47	Brain_Caudate_basal_ganglia
ENSG00000170425.3	ADORA2B	-6.19795	-0.215689	5.72035e-10	0.00143396	0.0247884	0.0424285	#N/A	17	17	17	Brain_Caudate_basal_ganglia
ENSG00000122591.11	FAM126A	6.19206	0.0991042	5.93834e-10	0.00831326	0.125306	1.9738e-06	#N/A	25	25	25	Brain_Caudate_basal_ganglia
ENSG00000184110.14	EIF3C	6.18226	0.0476902	6.31913e-10	0.0344968	0.0272969	0.03212	#N/A	50	51	51	Brain_Caudate_basal_ganglia
ENSG00000231943.7	PGM5P4-AS1	-6.14461	-0.0394868	8.01615e-10	0.0486749	0.257258	2.6077e-12	#N/A	42	45	45	Brain_Caudate_basal_ganglia
ENSG00000176953.12	NFATC2IP	6.13141	0.107489	8.71053e-10	0.00670419	0.0515434	0.00227445	#N/A	12	12	12	Brain_Caudate_basal_ganglia
ENSG00000100997.18	ABHD12	6.12947	0.10816	8.81721e-10	0.00717548	0.118113	7.74353e-06	#N/A	54	54	54	Brain_Caudate_basal_ganglia
ENSG00000175489.9	LRRC25	-6.11992	-0.121171	9.36234e-10	0.00551158	0.0757236	0.000376541	#N/A	23	23	23	Brain_Caudate_basal_ganglia
ENSG00000176920.11	FUT2	6.11224	0.0308617	9.82426e-10	0.0862856	0.207567	6.59606e-10	#N/A	91	91	91	Brain_Caudate_basal_ganglia
ENSG00000204764.13	RANBP17	6.05818	0.0354686	1.37666e-09	0.0571585	0.246839	7.19486e-12	#N/A	131	131	131	Brain_Caudate_basal_ganglia
ENSG00000149084.12	HSD17B12	-6.04189	-0.0257457	1.5232e-09	0.0994622	0.553577	1.33231e-34	#N/A	28	28	28	Brain_Caudate_basal_ganglia
ENSG00000159228.12	CBR1	5.98981	0.0472079	2.10081e-09	0.0372685	0.313365	7.6324e-16	#N/A	86	86	86	Brain_Caudate_basal_ganglia
ENSG00000232629.8	HLA-DQB2	5.98185	0.0224551	2.20611e-09	0.144019	0.412288	1.27337e-21	#N/A	37	37	37	Brain_Caudate_basal_ganglia
ENSG00000226913.1	BSN-AS2	-5.97649	-0.0645441	2.2799e-09	0.0194244	0.046854	0.0059277	#N/A	31	31	31	Brain_Caudate_basal_ganglia
ENSG00000146109.4	ABT1	5.96049	0.0686718	2.51486e-09	0.0179754	0.139229	1.11275e-06	#N/A	39	41	41	Brain_Caudate_basal_ganglia
ENSG00000067182.7	TNFRSF1A	5.94771	0.271239	2.7192e-09	0.000979442	0.0630038	0.00138843	#N/A	10	10	10	Brain_Caudate_basal_ganglia
ENSG00000226686.7	LINC01535	5.93791	0.013201	2.88687e-09	0.359639	0.6002	6.39513e-39	#N/A	36	36	36	Brain_Caudate_basal_ganglia
ENSG00000125618.16	PAX8	5.92013	0.0188047	3.21687e-09	0.165265	0.333167	8.35253e-17	#N/A	41	42	42	Brain_Caudate_basal_ganglia
ENSG00000160360.12	GPSM1	-5.86599	-0.361425	4.46466e-09	0.000627268	0.0252613	0.044835	#N/A	8	8	8	Brain_Caudate_basal_ganglia
ENSG00000142599.17	RERE	5.82435	0.0601679	5.73366e-09	0.0187972	0.149425	2.34542e-07	#N/A	15	15	15	Brain_Caudate_basal_ganglia
ENSG00000115602.16	IL1RL1	5.81854	0.0230567	5.93632e-09	0.127601	0.518493	4.29115e-30	#N/A	68	68	68	Brain_Caudate_basal_ganglia
ENSG00000171695.10	LKAAEAR1	5.80996	0.0783197	6.24874e-09	0.0124471	0.0526126	0.00326605	#N/A	15	15	15	Brain_Caudate_basal_ganglia
ENSG00000110536.13	PTPMT1	5.80596	0.275762	6.4e-09	0.000761801	0.0265586	0.0395639	#N/A	1	1	1	Brain_Caudate_basal_ganglia
ENSG00000164989.16	CCDC171	-5.78204	-0.0336963	7.38018e-09	0.0520756	0.348474	9.23656e-18	#N/A	34	34	34	Brain_Caudate_basal_ganglia
ENSG00000263001.5	GTF2I	-5.74266	-0.0857473	9.32008e-09	0.0115391	0.161979	3.88774e-08	#N/A	11	12	12	Brain_Caudate_basal_ganglia
ENSG00000130584.10	ZBTB46	-5.73283	-0.0986606	9.87661e-09	0.0070627	0.0760898	0.000236871	#N/A	6	6	6	Brain_Caudate_basal_ganglia
ENSG00000163798.13	SLC4A1AP	5.66975	0.112231	1.43003e-08	0.00567377	0.0465331	0.00491788	#N/A	34	34	34	Brain_Caudate_basal_ganglia
ENSG00000111775.2	COX6A1	-5.66864	-0.157681	1.43939e-08	0.00326881	0.0839945	0.000126741	#N/A	12	12	12	Brain_Caudate_basal_ganglia
ENSG00000158714.10	SLAMF8	-5.65567	-0.166781	1.55243e-08	0.012158	0.0254487	0.0424273	#N/A	40	40	40	Brain_Caudate_basal_ganglia
ENSG00000169203.16	NPIPB12	5.63708	0.0960234	1.72955e-08	0.0070157	0.0801975	0.000214788	#N/A	6	6	6	Brain_Caudate_basal_ganglia
ENSG00000090273.13	NUDC	-5.63488	-0.0921749	1.75183e-08	0.00783743	0.0237723	0.0454048	#N/A	40	40	40	Brain_Caudate_basal_ganglia
ENSG00000167384.10	ZNF180	5.63361	0.0285908	1.76472e-08	0.0717041	0.195679	1.08061e-09	#N/A	77	81	81	Brain_Caudate_basal_ganglia
ENSG00000100413.16	POLR3H	5.61782	0.100454	1.93383e-08	0.00498531	0.179513	1.21639e-08	#N/A	13	14	14	Brain_Caudate_basal_ganglia
ENSG00000108784.9	NAGLU	-5.59282	-0.112378	2.23406e-08	0.00472719	0.0512916	0.00306612	#N/A	20	20	20	Brain_Caudate_basal_ganglia
ENSG00000115604.10	IL18R1	5.59171	0.0229604	2.24838e-08	0.120234	0.604051	1.60737e-39	#N/A	27	27	27	Brain_Caudate_basal_ganglia
ENSG00000181315.10	ZNF322	-5.59132	-0.0318549	2.25356e-08	0.067187	0.501693	4.22383e-28	#N/A	60	64	64	Brain_Caudate_basal_ganglia
ENSG00000155542.11	SETD9	5.58938	0.0253961	2.27878e-08	0.0953695	0.399149	8.26216e-22	#N/A	70	70	70	Brain_Caudate_basal_ganglia
ENSG00000196275.13	GTF2IRD2	-5.58102	-0.0329043	2.39115e-08	0.070601	0.508087	2.21564e-29	#N/A	10	12	12	Brain_Caudate_basal_ganglia
ENSG00000158113.12	LRRC43	-5.56713	-0.297718	2.58976e-08	0.000680015	0.0348068	0.0178144	#N/A	6	6	6	Brain_Caudate_basal_ganglia
ENSG00000137411.16	VARS2	5.5287	0.0333997	3.22611e-08	0.0592302	0.438405	7.41317e-24	#N/A	52	53	53	Brain_Caudate_basal_ganglia
ENSG00000204520.12	MICA	-5.50081	-0.0258147	3.78052e-08	0.117932	0.489564	1.24029e-27	#N/A	30	33	33	Brain_Caudate_basal_ganglia
ENSG00000159231.5	CBR3	5.47893	0.0495503	4.27895e-08	0.0283555	0.0592363	0.00186749	#N/A	49	49	49	Brain_Caudate_basal_ganglia
ENSG00000238078.1	LINC01352	5.47392	0.0195767	4.40189e-08	0.133719	0.234888	1.65388e-11	#N/A	55	57	57	Brain_Caudate_basal_ganglia
ENSG00000163586.9	FABP1	-5.46112	-0.0169062	4.73138e-08	0.18419	0.370557	4.91363e-19	#N/A	28	30	30	Brain_Caudate_basal_ganglia
ENSG00000175170.14	FAM182B	5.46001	0.0207202	4.76116e-08	0.169348	0.368892	5.07865e-19	#N/A	39	39	39	Brain_Caudate_basal_ganglia
ENSG00000253641.5	LINCR-0001	5.45669	0.0383865	4.85092e-08	0.0426709	0.175146	2.59587e-08	#N/A	30	33	33	Brain_Caudate_basal_ganglia
ENSG00000186523.14	FAM86B1	5.36969	0.0594803	7.88742e-08	0.0157399	0.0861829	0.000163098	#N/A	7	9	9	Brain_Caudate_basal_ganglia
ENSG00000164733.20	CTSB	-5.36032	-0.0458981	8.30727e-08	0.0252635	0.194061	2.63522e-09	#N/A	23	23	23	Brain_Caudate_basal_ganglia
ENSG00000272823.1	RP11-295M18.6	5.33676	0.0202433	9.4624e-08	0.099034	0.225852	1.06949e-10	#N/A	53	56	56	Brain_Caudate_basal_ganglia
ENSG00000117500.12	TMED5	5.32504	0.161466	1.00932e-07	0.00236622	0.0770434	0.000334404	#N/A	12	14	14	Brain_Caudate_basal_ganglia
ENSG00000165915.13	SLC39A13	5.31775	0.139959	1.05059e-07	0.00223912	0.0390722	0.0123406	#N/A	7	7	7	Brain_Caudate_basal_ganglia
ENSG00000134077.15	THUMPD3	-5.29219	-0.0445977	1.20863e-07	0.0357244	0.267594	7.51491e-14	#N/A	28	28	28	Brain_Caudate_basal_ganglia
ENSG00000213760.10	ATP6V1G2	5.28426	0.118263	1.26212e-07	0.00471137	0.0506311	0.0038479	#N/A	46	49	49	Brain_Caudate_basal_ganglia
ENSG00000273356.1	LINC02019	-5.23839	-0.0760917	1.61988e-07	0.0110378	0.0440028	0.00569805	#N/A	46	46	46	Brain_Caudate_basal_ganglia
ENSG00000154328.15	NEIL2	5.22587	0.040725	1.73338e-07	0.0411784	0.190004	3.27516e-09	#N/A	44	46	46	Brain_Caudate_basal_ganglia
ENSG00000213689.11	TREX1	-5.18952	-0.0980202	2.10839e-07	0.00538598	0.113349	1.07582e-05	#N/A	29	32	32	Brain_Caudate_basal_ganglia
ENSG00000158092.6	NCK1	-5.15679	-0.1152	2.51213e-07	0.00373574	0.0881557	0.000122436	#N/A	2	2	2	Brain_Caudate_basal_ganglia
ENSG00000204428.12	LY6G5C	-5.15352	-0.0207339	2.55637e-07	0.124986	0.503065	2.27014e-32	#N/A	14	14	14	Brain_Caudate_basal_ganglia
ENSG00000198952.8	SMG5	-5.13397	-0.0795215	2.83693e-07	0.00799457	0.158518	1.13832e-07	#N/A	44	44	44	Brain_Caudate_basal_ganglia
ENSG00000090861.15	AARS	5.10344	0.0713263	3.33542e-07	0.0109166	0.0253698	0.0417059	#N/A	38	39	39	Brain_Caudate_basal_ganglia
ENSG00000146205.13	ANO7	5.10239	0.0277639	3.35386e-07	0.0648184	0.178484	3.36978e-09	#N/A	43	44	44	Brain_Caudate_basal_ganglia
ENSG00000152763.16	WDR78	-5.08572	-0.0465729	3.66235e-07	0.0232076	0.0347572	0.0158346	#N/A	70	71	71	Brain_Caudate_basal_ganglia
ENSG00000065060.16	UHRF1BP1	5.08526	0.0518667	3.67123e-07	0.0176186	0.177067	1.75309e-08	#N/A	11	11	11	Brain_Caudate_basal_ganglia
ENSG00000087338.4	GMCL1	-5.04944	-0.0850257	4.43114e-07	0.00714584	0.0375149	0.0129548	#N/A	15	15	15	Brain_Caudate_basal_ganglia
ENSG00000087365.15	SF3B2	5.04932	0.07731	4.43393e-07	0.00967358	0.173098	1.31786e-08	#N/A	9	9	9	Brain_Caudate_basal_ganglia
ENSG00000110944.8	IL23A	-5.02826	-0.026576	4.94945e-07	0.0896039	0.0764941	0.000147906	#N/A	64	66	66	Brain_Caudate_basal_ganglia
ENSG00000239642.5	MEIKIN	-5.02396	-0.044206	5.06168e-07	0.0297433	0.0632017	0.000986538	#N/A	21	21	21	Brain_Caudate_basal_ganglia
ENSG00000084734.8	GCKR	5.01173	0.0580927	5.3942e-07	0.0132776	0.0423598	0.00880085	#N/A	11	11	11	Brain_Caudate_basal_ganglia
ENSG00000204427.11	ABHD16A	4.98753	0.0737526	6.11574e-07	0.00930692	0.0530407	0.00314697	#N/A	45	48	48	Brain_Caudate_basal_ganglia
ENSG00000073605.18	GSDMB	4.96459	0.0672599	6.88447e-07	0.0103243	0.0471952	0.00588652	#N/A	41	41	41	Brain_Caudate_basal_ganglia
ENSG00000198218.10	QRICH1	-4.95655	-0.10206	7.17549e-07	0.00484278	0.0678413	0.000890222	#N/A	9	9	9	Brain_Caudate_basal_ganglia
ENSG00000235209.1	CTA-150C2.13	-4.9532	-0.017195	7.30027e-07	0.168614	0.263388	8.6975e-13	#N/A	52	52	52	Brain_Caudate_basal_ganglia
ENSG00000134490.13	TMEM241	-4.92103	-0.118699	8.60882e-07	0.00323316	0.0644574	0.00112415	#N/A	26	26	26	Brain_Caudate_basal_ganglia
ENSG00000204060.6	FOXO6	-4.91822	-0.10248	8.73332e-07	0.00373784	0.0343186	0.0185689	#N/A	28	28	28	Brain_Caudate_basal_ganglia
ENSG00000100239.15	PPP6R2	-4.91811	-0.0672234	8.73831e-07	0.0105129	0.237113	2.16143e-11	#N/A	14	14	14	Brain_Caudate_basal_ganglia
ENSG00000107758.15	PPP3CB	-4.91183	-0.208445	9.02287e-07	0.00098085	0.0742384	0.000273436	#N/A	20	20	20	Brain_Caudate_basal_ganglia
ENSG00000274070.1	GATSL2	4.89561	1.48006	9.79999e-07	2.62432e-05	0.130419	1.57003e-06	#N/A	1	3	3	Brain_Caudate_basal_ganglia
ENSG00000170291.14	ELP5	-4.89335	-0.0483295	9.9133e-07	0.0210119	0.0849651	0.000115508	#N/A	59	61	61	Brain_Caudate_basal_ganglia
ENSG00000055211.12	GINM1	4.86549	0.105478	1.14174e-06	0.00431591	0.0422113	0.00765898	#N/A	48	49	49	Brain_Caudate_basal_ganglia
ENSG00000157322.17	CLEC18A	-4.8458	-0.0196021	1.26105e-06	0.112431	0.381943	9.9435e-20	#N/A	20	21	21	Brain_Caudate_basal_ganglia
ENSG00000226516.7	FAM138B	-4.83596	-0.0198239	1.32502e-06	0.124975	0.291716	3.47366e-14	#N/A	97	101	101	Brain_Caudate_basal_ganglia
ENSG00000169592.14	INO80E	-4.82638	-0.0619477	1.39038e-06	0.0134083	0.137064	9.49113e-07	#N/A	32	32	32	Brain_Caudate_basal_ganglia
ENSG00000157895.11	C12orf43	4.82272	0.0829367	1.41614e-06	0.0101869	0.136171	1.44556e-06	#N/A	28	28	28	Brain_Caudate_basal_ganglia
ENSG00000131023.12	LATS1	-4.82043	-0.131559	1.4325e-06	0.00263964	0.0367767	0.0147806	#N/A	44	44	44	Brain_Caudate_basal_ganglia
ENSG00000273295.1	AP000350.5	4.81392	0.0113324	1.48001e-06	0.338569	0.615356	2.31847e-43	#N/A	53	53	53	Brain_Caudate_basal_ganglia
ENSG00000224243.1	LINC00403	-4.81124	-0.304761	1.5e-06	0.000590321	0.0356129	0.016337	#N/A	1	5	5	Brain_Caudate_basal_ganglia
ENSG00000159210.9	SNF8	4.80768	0.0471404	1.5269e-06	0.018336	0.192962	3.01342e-09	#N/A	21	21	21	Brain_Caudate_basal_ganglia
ENSG00000162714.12	ZNF496	4.8024	0.0393351	1.56775e-06	0.0329619	0.12299	2.93936e-06	#N/A	40	42	42	Brain_Caudate_basal_ganglia
ENSG00000271904.1	CTC-498M16.4	-4.79096	-0.0247986	1.65982e-06	0.0818587	0.185609	4.88987e-09	#N/A	34	34	34	Brain_Caudate_basal_ganglia
ENSG00000172346.14	CSDC2	4.78251	0.0726512	1.73119e-06	0.00681619	0.0968013	4.32109e-05	#N/A	21	21	21	Brain_Caudate_basal_ganglia
ENSG00000197343.10	ZNF655	-4.74902	-0.150402	2.04406e-06	0.00346909	0.0386918	0.0119829	#N/A	29	29	29	Brain_Caudate_basal_ganglia
ENSG00000106477.18	CEP41	4.74281	0.0990427	2.10772e-06	0.00448819	0.058296	0.00136071	#N/A	5	5	5	Brain_Caudate_basal_ganglia
ENSG00000145337.4	PYURF	4.73836	0.058519	2.15451e-06	0.0125141	0.0329855	0.0191329	#N/A	16	16	16	Brain_Caudate_basal_ganglia
ENSG00000101639.18	CEP192	-4.73075	-0.0150816	2.2369e-06	0.195646	0.59884	1.86569e-39	#N/A	24	24	24	Brain_Caudate_basal_ganglia
ENSG00000174953.13	DHX36	-4.71248	-0.19478	2.44719e-06	0.0012419	0.06191	0.00139607	#N/A	15	15	15	Brain_Caudate_basal_ganglia
ENSG00000160392.13	C19orf47	-4.70127	-0.0985599	2.58545e-06	0.00414038	0.087305	0.00012586	#N/A	14	14	14	Brain_Caudate_basal_ganglia
ENSG00000177710.5	SLC35G5	-4.67442	-0.0407244	2.94782e-06	0.0302165	0.0609449	0.00156389	#N/A	24	24	24	Brain_Caudate_basal_ganglia
ENSG00000186300.11	ZNF555	4.67035	0.0562046	3.00684e-06	0.0133222	0.0555564	0.00271768	#N/A	25	25	25	Brain_Caudate_basal_ganglia
ENSG00000260259.1	LINC02166	4.66816	0.0388987	3.03916e-06	0.0278792	0.153932	1.16898e-07	#N/A	20	20	20	Brain_Caudate_basal_ganglia
ENSG00000171634.16	BPTF	-4.65626	-0.116133	3.22012e-06	0.0036091	0.129169	5.59798e-07	#N/A	4	4	4	Brain_Caudate_basal_ganglia
ENSG00000223496.2	EXOSC6	-4.65474	-0.0255007	3.24389e-06	0.0633582	0.564125	1.17009e-35	#N/A	12	12	12	Brain_Caudate_basal_ganglia
ENSG00000253678.1	RP11-981G7.3	4.64687	0.0309616	3.37002e-06	0.0599594	0.230133	5.92563e-11	#N/A	11	11	11	Brain_Caudate_basal_ganglia
ENSG00000167077.12	MEI1	4.63788	0.0686401	3.52009e-06	0.00735139	0.0393379	0.0114158	#N/A	7	8	8	Brain_Caudate_basal_ganglia
ENSG00000178904.18	DPY19L3	-4.59781	-0.0410698	4.26957e-06	0.0256996	0.110637	1.55663e-05	#N/A	21	22	22	Brain_Caudate_basal_ganglia
ENSG00000169689.14	CENPX	-4.58856	-0.0470877	4.46311e-06	0.0153863	0.192601	3.94946e-09	#N/A	15	15	15	Brain_Caudate_basal_ganglia
ENSG00000067208.14	EVI5	4.57787	0.0329515	4.69744e-06	0.0371529	0.12693	2.11751e-06	#N/A	132	134	134	Brain_Caudate_basal_ganglia
ENSG00000203880.11	PCMTD2	4.56349	0.0312368	5.03094e-06	0.0445559	0.115735	7.94286e-06	#N/A	50	50	50	Brain_Caudate_basal_ganglia
ENSG00000106261.16	ZKSCAN1	-4.56157	-0.0961592	5.07732e-06	0.00461729	0.0539693	0.00244239	#N/A	14	14	14	Brain_Caudate_basal_ganglia
ENSG00000234745.10	HLA-B	4.55677	0.044415	5.19454e-06	0.0224654	0.120612	5.57248e-06	#N/A	58	62	62	Brain_Caudate_basal_ganglia
ENSG00000114735.9	HEMK1	-4.54854	-0.073534	5.40193e-06	0.00888478	0.0770041	0.000195544	#N/A	74	109	109	Brain_Caudate_basal_ganglia
ENSG00000197457.9	STMN3	-4.51668	-0.0776053	6.28176e-06	0.00757693	0.0910733	6.38803e-05	#N/A	43	43	43	Brain_Caudate_basal_ganglia
ENSG00000237651.6	C2orf74	4.49834	0.0268753	6.84866e-06	0.0598025	0.483481	2.33357e-27	#N/A	22	22	22	Brain_Caudate_basal_ganglia
ENSG00000112039.3	FANCE	-4.48137	-0.107533	7.41657e-06	0.00331669	0.0583954	0.00188022	#N/A	5	5	5	Brain_Caudate_basal_ganglia
ENSG00000183172.8	SMDT1	-4.47645	-0.0727807	7.58955e-06	0.00770963	0.170725	1.60732e-08	#N/A	39	40	40	Brain_Caudate_basal_ganglia
ENSG00000185561.9	TLCD2	4.4763	0.0608515	7.59469e-06	0.0129588	0.0618761	0.000895889	#N/A	18	20	20	Brain_Caudate_basal_ganglia
ENSG00000136881.11	BAAT	-4.44713	-0.0279995	8.70255e-06	0.0648218	0.181389	6.77891e-09	#N/A	74	74	74	Brain_Caudate_basal_ganglia
ENSG00000149499.11	EML3	-4.43854	-0.26202	9.0571e-06	0.000542701	0.0356046	0.0151947	#N/A	5	5	5	Brain_Caudate_basal_ganglia
ENSG00000143434.15	SEMA6C	4.43818	0.0666891	9.07206e-06	0.00957057	0.140705	9.3862e-07	#N/A	11	11	11	Brain_Caudate_basal_ganglia
ENSG00000254532.1	RP11-624D11.2	-4.42682	-0.0150165	9.5634e-06	0.172819	0.311556	1.51378e-15	#N/A	64	65	65	Brain_Caudate_basal_ganglia
ENSG00000157837.15	SPPL3	20.0872	0.313919	9.5588e-90	0.00860699	0.0442322	0.00900243	#N/A	13	13	13	Brain_Hypothalamus
ENSG00000163239.12	TDRD10	-18.1871	-0.61193	6.52477e-74	0.00171783	0.0733634	0.000840682	#N/A	4	4	4	Brain_Hypothalamus
ENSG00000115211.15	EIF2B4	17.0904	0.39584	1.74895e-65	0.00410847	0.0378117	0.0188235	#N/A	18	18	18	Brain_Hypothalamus
ENSG00000184949.15	FAM227A	-13.9148	-0.223692	5.14683e-44	0.00854863	0.112104	3.06017e-05	#N/A	34	34	34	Brain_Hypothalamus
ENSG00000196126.11	HLA-DRB1	-12.3831	-0.144678	3.22576e-35	0.0145049	0.0911402	0.000201322	#N/A	53	54	54	Brain_Hypothalamus
ENSG00000237541.3	HLA-DQA2	12.1498	0.0365775	5.74858e-34	0.217625	0.470468	5.40266e-25	#N/A	88	88	88	Brain_Hypothalamus
ENSG00000170684.8	ZNF296	12.0417	0.25217	2.14591e-33	0.00509537	0.0657058	0.00110683	#N/A	12	12	12	Brain_Hypothalamus
ENSG00000204525.16	HLA-C	-11.6197	-0.066812	3.27427e-31	0.065023	0.426422	4.28881e-21	#N/A	41	43	43	Brain_Hypothalamus
ENSG00000183682.7	BMP8A	11.3294	0.325406	9.38553e-30	0.00247013	0.0460474	0.00958939	#N/A	10	10	10	Brain_Hypothalamus
ENSG00000135127.11	BICDL1	-11.2643	-0.275869	1.96931e-29	0.0035727	0.112454	2.4984e-05	#N/A	12	12	12	Brain_Hypothalamus
ENSG00000025434.18	NR1H3	-10.8033	-0.171483	3.32105e-27	0.00768004	0.0278909	0.0438721	#N/A	12	12	12	Brain_Hypothalamus
ENSG00000224389.8	C4B	-10.7552	-0.129242	5.59876e-27	0.0140125	0.0418903	0.0128998	#N/A	36	37	37	Brain_Hypothalamus
ENSG00000240053.8	LY6G5B	-10.6185	-0.140982	2.44435e-26	0.01213	0.1345	4.49574e-06	#N/A	83	86	86	Brain_Hypothalamus
ENSG00000164068.15	RNF123	10.478	0.203519	1.09025e-25	0.00571449	0.0945794	0.00014001	#N/A	67	67	67	Brain_Hypothalamus
ENSG00000179639.10	FCER1A	-9.94283	-0.117874	2.71026e-23	0.0133598	0.0911062	0.000186036	#N/A	8	8	8	Brain_Hypothalamus
ENSG00000261241.5	LINC02128	9.29171	0.0480234	1.51836e-20	0.0691719	0.152263	6.85263e-07	#N/A	37	38	38	Brain_Hypothalamus
ENSG00000159905.14	ZNF221	9.28497	0.0727675	1.61754e-20	0.0418646	0.0602755	0.0028936	#N/A	56	63	63	Brain_Hypothalamus
ENSG00000142233.11	NTN5	9.08245	0.0895512	1.06156e-19	0.0230643	0.117281	2.12589e-05	#N/A	32	33	33	Brain_Hypothalamus
ENSG00000122971.8	ACADS	-9.04399	-0.109533	1.51057e-19	0.0138367	0.149585	1.07207e-06	#N/A	28	38	38	Brain_Hypothalamus
ENSG00000139725.7	RHOF	9.03524	0.117847	1.63648e-19	0.0131697	0.0338577	0.025878	#N/A	30	30	30	Brain_Hypothalamus
ENSG00000157782.9	CABP1	-8.99897	-0.237918	2.27846e-19	0.00332948	0.0631679	0.00159874	#N/A	12	13	13	Brain_Hypothalamus
ENSG00000213676.10	ATF6B	8.92377	0.165508	4.50687e-19	0.00590492	0.0882081	0.000259881	#N/A	8	8	8	Brain_Hypothalamus
ENSG00000196683.10	TOMM7	8.89626	0.184439	5.77624e-19	0.00479933	0.115076	2.54632e-05	#N/A	9	9	9	Brain_Hypothalamus
ENSG00000244731.7	C4A	8.88399	0.0753311	6.45048e-19	0.0233639	0.141818	1.9791e-06	#N/A	31	31	31	Brain_Hypothalamus
ENSG00000084774.13	CAD	8.87958	0.221852	6.71148e-19	0.00324074	0.0351306	0.0231254	#N/A	19	19	19	Brain_Hypothalamus
ENSG00000204463.12	BAG6	8.87684	0.129403	6.87887e-19	0.0107899	0.145034	1.81628e-06	#N/A	13	13	13	Brain_Hypothalamus
ENSG00000213625.8	LEPROT	-8.78961	-0.24865	1.50079e-18	0.00217997	0.0408465	0.0140589	#N/A	4	4	4	Brain_Hypothalamus
ENSG00000138085.16	ATRAID	-8.61098	-0.256942	7.24409e-18	0.00223608	0.0508717	0.00583575	#N/A	10	10	10	Brain_Hypothalamus
ENSG00000259616.2	RP11-507B12.2	8.57824	0.16558	9.63366e-18	0.00561875	0.0339043	0.0219226	#N/A	10	10	10	Brain_Hypothalamus
ENSG00000232629.8	HLA-DQB2	8.5039	0.0278697	1.83326e-17	0.193755	0.458874	2.38102e-23	#N/A	50	51	51	Brain_Hypothalamus
ENSG00000176909.11	MAMSTR	8.30041	0.0785212	1.03751e-16	0.0249083	0.193061	1.25294e-08	#N/A	21	21	21	Brain_Hypothalamus
ENSG00000158406.4	HIST1H4H	-7.97591	-0.0968639	1.51256e-15	0.0119173	0.0495863	0.00497413	#N/A	21	21	21	Brain_Hypothalamus
ENSG00000186567.12	CEACAM19	-7.92771	-0.0926481	2.23231e-15	0.0156598	0.102991	5.88783e-05	#N/A	47	47	47	Brain_Hypothalamus
ENSG00000004534.14	RBM6	-7.89749	-0.0640321	2.84571e-15	0.0319677	0.263322	6.68646e-13	#N/A	45	46	46	Brain_Hypothalamus
ENSG00000212694.8	LINC01089	-7.82673	-0.0766979	5.00725e-15	0.0251055	0.0940635	0.00011757	#N/A	57	58	58	Brain_Hypothalamus
ENSG00000196502.11	SULT1A1	-7.72	-0.0570413	1.16329e-14	0.0324146	0.197934	9.24794e-09	#N/A	20	28	28	Brain_Hypothalamus
ENSG00000227888.4	FAM66A	7.52826	0.0380002	5.14222e-14	0.0926621	0.278502	2.21425e-12	#N/A	20	22	22	Brain_Hypothalamus
ENSG00000154328.15	NEIL2	7.5249	0.075608	5.27589e-14	0.0224319	0.220249	3.4887e-10	#N/A	22	22	22	Brain_Hypothalamus
ENSG00000233232.6	NPIPB7	-7.51403	-0.0501979	5.73342e-14	0.0443603	0.147314	1.65519e-06	#N/A	33	33	33	Brain_Hypothalamus
ENSG00000261390.5	MAFTRR	-7.4859	-0.0385906	7.10583e-14	0.0848564	0.401947	7.79822e-19	#N/A	6	6	6	Brain_Hypothalamus
ENSG00000148384.12	INPP5E	-7.40263	-0.119575	1.33517e-13	0.00937951	0.2176	2.8881e-10	#N/A	16	19	19	Brain_Hypothalamus
ENSG00000111912.19	NCOA7	-7.37425	-0.0795432	1.65276e-13	0.019244	0.0907994	0.000169733	#N/A	111	112	112	Brain_Hypothalamus
ENSG00000169224.12	GCSAML	7.34285	0.0466735	2.09096e-13	0.052037	0.0721796	0.000814206	#N/A	29	29	29	Brain_Hypothalamus
ENSG00000184110.14	EIF3C	7.34147	0.0811273	2.11262e-13	0.0159062	0.10466	3.83129e-05	#N/A	21	21	21	Brain_Hypothalamus
ENSG00000108384.14	RAD51C	7.28314	0.0410661	3.26144e-13	0.0550807	0.336675	1.88766e-15	#N/A	37	37	37	Brain_Hypothalamus
ENSG00000137411.16	VARS2	7.22662	0.0388551	4.95175e-13	0.0703063	0.399573	4.50764e-19	#N/A	71	73	73	Brain_Hypothalamus
ENSG00000197165.10	SULT1A2	7.13364	0.0236349	9.77497e-13	0.17008	0.177453	5.85211e-08	#N/A	61	69	69	Brain_Hypothalamus
ENSG00000179344.16	HLA-DQB1	-7.12212	-0.0275346	1.06277e-12	0.132616	0.52422	2.21026e-28	#N/A	13	13	13	Brain_Hypothalamus
ENSG00000198502.5	HLA-DRB5	-7.08165	-0.0296753	1.42449e-12	0.119064	0.533975	4.356e-30	#N/A	25	27	27	Brain_Hypothalamus
ENSG00000226516.7	FAM138B	7.08037	0.0855171	1.43773e-12	0.0128723	0.043388	0.0109663	#N/A	44	45	45	Brain_Hypothalamus
ENSG00000214530.8	STARD10	7.0119	0.0800312	2.35103e-12	0.0173631	0.150602	6.49205e-07	#N/A	18	19	19	Brain_Hypothalamus
ENSG00000100997.18	ABHD12	6.94965	0.18111	3.66195e-12	0.00313231	0.117226	1.49819e-05	#N/A	40	40	40	Brain_Hypothalamus
ENSG00000109919.9	MTCH2	6.93008	0.131439	4.20601e-12	0.00487334	0.0706532	0.00101472	#N/A	8	8	8	Brain_Hypothalamus
ENSG00000188986.6	NELFB	6.88457	1.16861	5.79625e-12	8.44772e-05	0.340385	8.72498e-16	#N/A	3	11	11	Brain_Hypothalamus
ENSG00000196968.10	FUT11	6.87593	0.0663472	6.15864e-12	0.0176315	0.0623866	0.00242986	#N/A	21	21	21	Brain_Hypothalamus
ENSG00000233393.1	AP000688.29	6.84928	0.0988698	7.42227e-12	0.0117438	0.0742683	0.000840376	#N/A	12	12	12	Brain_Hypothalamus
ENSG00000178952.10	TUFM	6.73908	0.10014	1.59398e-11	0.00918478	0.0747873	0.000868037	#N/A	24	24	24	Brain_Hypothalamus
ENSG00000206344.7	HCG27	6.7103	0.0463254	1.94225e-11	0.0514723	0.152396	1.01374e-06	#N/A	62	63	63	Brain_Hypothalamus
ENSG00000196787.3	HIST1H2AG	-6.70032	-0.0386875	2.07966e-11	0.0479429	0.12966	5.44937e-06	#N/A	67	67	67	Brain_Hypothalamus
ENSG00000162714.12	ZNF496	6.59979	0.0716937	4.1175e-11	0.0180283	0.0267212	0.049679	#N/A	67	67	67	Brain_Hypothalamus
ENSG00000114054.13	PCCB	-6.59318	-0.0530329	4.30498e-11	0.0262963	0.101239	9.13846e-05	#N/A	83	83	83	Brain_Hypothalamus
ENSG00000166529.14	ZSCAN21	-6.52235	-0.0548976	6.92154e-11	0.0332359	0.189246	1.58951e-08	#N/A	9	9	9	Brain_Hypothalamus
ENSG00000221883.2	ARIH2OS	6.5174	0.13639	7.15343e-11	0.00677231	0.0278054	0.0404047	#N/A	37	38	38	Brain_Hypothalamus
ENSG00000100413.16	POLR3H	6.50902	0.0921489	7.56416e-11	0.00894007	0.0905637	0.000186818	#N/A	54	55	55	Brain_Hypothalamus
ENSG00000178467.17	P4HTM	6.48859	0.124902	8.66411e-11	0.00568791	0.122585	1.32861e-05	#N/A	24	24	24	Brain_Hypothalamus
ENSG00000196275.13	GTF2IRD2	-6.45907	-0.0330751	1.05346e-10	0.0899208	0.44265	1.1992e-21	#N/A	40	42	42	Brain_Hypothalamus
ENSG00000213672.7	NCKIPSD	6.434	0.0495756	1.2429e-10	0.0348578	0.315408	1.74912e-14	#N/A	36	38	38	Brain_Hypothalamus
ENSG00000100196.10	KDELR3	-6.37389	-0.0732941	1.8429e-10	0.0175566	0.089817	0.000203865	#N/A	38	38	38	Brain_Hypothalamus
ENSG00000231852.6	CYP21A2	6.35205	0.0275123	2.12459e-10	0.109766	0.113591	2.46532e-05	#N/A	108	110	110	Brain_Hypothalamus
ENSG00000159228.12	CBR1	6.33295	0.0757805	2.40515e-10	0.0165062	0.261943	2.26196e-11	#N/A	33	34	34	Brain_Hypothalamus
ENSG00000158092.6	NCK1	-6.20825	-0.0896488	5.35781e-10	0.00999842	0.103604	4.77289e-05	#N/A	25	25	25	Brain_Hypothalamus
ENSG00000263001.5	GTF2I	-6.19772	-0.0964317	5.72873e-10	0.0105189	0.277156	1.88196e-12	#N/A	9	9	9	Brain_Hypothalamus
ENSG00000167077.12	MEI1	6.18839	0.0850561	6.07833e-10	0.00964876	0.0769468	0.000651659	#N/A	39	39	39	Brain_Hypothalamus
ENSG00000167272.10	POP5	-6.1873	-0.0412175	6.12048e-10	0.0219622	0.0613875	0.00248355	#N/A	57	58	58	Brain_Hypothalamus
ENSG00000244063.1	AC024704.2	-6.17064	-0.0671253	6.80149e-10	0.0147259	0.0720424	0.00105548	#N/A	56	56	56	Brain_Hypothalamus
ENSG00000272221.1	XXbac-BPG181B23.7	-6.14973	-0.031717	7.76146e-10	0.0902065	0.359901	8.17008e-17	#N/A	42	44	44	Brain_Hypothalamus
ENSG00000226686.7	LINC01535	6.13542	0.0149835	8.49335e-10	0.292248	0.575775	2.62962e-32	#N/A	57	57	57	Brain_Hypothalamus
ENSG00000229453.2	SPINK8	-6.1216	-0.113874	9.26399e-10	0.00699906	0.0315254	0.0329353	#N/A	11	11	11	Brain_Hypothalamus
ENSG00000235209.1	CTA-150C2.13	-6.10297	-0.0220606	1.04114e-09	0.138359	0.36912	1.18453e-18	#N/A	35	35	35	Brain_Hypothalamus
ENSG00000143603.18	KCNN3	6.07862	0.0559463	1.21218e-09	0.0213797	0.13508	3.51936e-06	#N/A	54	55	55	Brain_Hypothalamus
ENSG00000214941.7	ZSWIM7	-6.06477	-0.0440665	1.3214e-09	0.0307427	0.244652	5.00726e-11	#N/A	26	27	27	Brain_Hypothalamus
ENSG00000149084.12	HSD17B12	-6.05041	-0.033248	1.44481e-09	0.0606608	0.402715	7.05673e-20	#N/A	53	53	53	Brain_Hypothalamus
ENSG00000186074.18	CD300LF	5.96493	0.0552993	2.44745e-09	0.0236411	0.0832109	0.000358297	#N/A	54	55	55	Brain_Hypothalamus
ENSG00000175170.14	FAM182B	5.96265	0.0202492	2.48172e-09	0.201016	0.455796	2.68773e-23	#N/A	62	63	63	Brain_Hypothalamus
ENSG00000157322.17	CLEC18A	-5.95983	-0.0175404	2.52505e-09	0.228499	0.526632	2.11683e-28	#N/A	16	16	16	Brain_Hypothalamus
ENSG00000141458.12	NPC1	-5.94328	-0.172633	2.79376e-09	0.00234702	0.102952	5.00893e-05	#N/A	4	5	5	Brain_Hypothalamus
ENSG00000175115.11	PACS1	-5.92065	-0.118404	3.20662e-09	0.00591801	0.0662468	0.00174925	#N/A	16	16	16	Brain_Hypothalamus
ENSG00000272823.1	RP11-295M18.6	5.91457	0.0360574	3.32742e-09	0.0450285	0.224618	3.63118e-10	#N/A	25	25	25	Brain_Hypothalamus
ENSG00000100162.14	CENPM	5.90631	0.0540542	3.49861e-09	0.0200254	0.0701257	0.000982204	#N/A	7	7	7	Brain_Hypothalamus
ENSG00000196260.4	SFTA2	5.7808	0.0607294	7.43478e-09	0.0206795	0.0592981	0.00227601	#N/A	15	15	15	Brain_Hypothalamus
ENSG00000203880.11	PCMTD2	5.70078	0.119749	1.19259e-08	0.00467212	0.0317675	0.0304223	#N/A	5	5	5	Brain_Hypothalamus
ENSG00000125618.16	PAX8	5.64649	0.0209922	1.63757e-08	0.119925	0.31417	3.67528e-14	#N/A	14	14	14	Brain_Hypothalamus
ENSG00000167384.10	ZNF180	5.61414	0.0482348	1.97542e-08	0.0271546	0.10627	3.54129e-05	#N/A	50	52	52	Brain_Hypothalamus
ENSG00000126457.21	PRMT1	5.58431	0.110357	2.34629e-08	0.00589611	0.0814537	0.000354374	#N/A	26	26	26	Brain_Hypothalamus
ENSG00000213995.11	NAXD	-5.54197	-0.0934437	2.99094e-08	0.00784599	0.0915216	0.000121438	#N/A	9	9	9	Brain_Hypothalamus
ENSG00000109758.8	HGFAC	5.51392	0.139221	3.50924e-08	0.00326838	0.0974051	7.44822e-05	#N/A	4	4	4	Brain_Hypothalamus
ENSG00000242252.1	BGLAP	-5.44999	-0.0947047	5.0374e-08	0.00671143	0.102018	1.84342e-05	#N/A	12	13	13	Brain_Hypothalamus
ENSG00000180979.9	LRRC57	-5.40246	-0.0538113	6.57316e-08	0.0194172	0.0476313	0.00757849	#N/A	40	41	41	Brain_Hypothalamus
ENSG00000174939.10	ASPHD1	5.32406	0.0698076	1.01477e-07	0.0116802	0.135761	1.36939e-06	#N/A	43	47	47	Brain_Hypothalamus
ENSG00000065060.16	UHRF1BP1	5.27445	0.0639698	1.33155e-07	0.0126158	0.165275	2.54706e-07	#N/A	71	73	73	Brain_Hypothalamus
ENSG00000152760.9	TCTEX1D1	-5.24073	-0.0794155	1.5994e-07	0.00848804	0.116008	2.32452e-05	#N/A	49	49	49	Brain_Hypothalamus
ENSG00000228022.5	HCG20	5.21144	0.0248267	1.8738e-07	0.0732016	0.172247	7.37273e-08	#N/A	43	43	43	Brain_Hypothalamus
ENSG00000238078.1	LINC01352	5.2036	0.0400793	1.95466e-07	0.0297925	0.1422	1.56935e-06	#N/A	11	11	11	Brain_Hypothalamus
ENSG00000134077.15	THUMPD3	-5.20354	-0.0504262	1.95524e-07	0.028136	0.170578	1.1549e-07	#N/A	26	26	26	Brain_Hypothalamus
ENSG00000114650.18	SCAP	-5.20239	-0.0784097	1.96737e-07	0.00797498	0.131859	3.6995e-06	#N/A	18	18	18	Brain_Hypothalamus
ENSG00000271904.1	CTC-498M16.4	-5.1886	-0.0344184	2.11884e-07	0.0510018	0.155191	6.8665e-07	#N/A	23	28	28	Brain_Hypothalamus
ENSG00000213699.8	SLC35F6	-5.1835	-0.092274	2.17757e-07	0.00659277	0.0321822	0.0259204	#N/A	18	18	18	Brain_Hypothalamus
ENSG00000243477.5	NAT6	5.17334	0.0500497	2.29952e-07	0.0212439	0.0968074	7.04749e-05	#N/A	41	41	41	Brain_Hypothalamus
ENSG00000115602.16	IL1RL1	5.16529	0.0355274	2.40062e-07	0.0487162	0.314491	9.36257e-15	#N/A	16	16	16	Brain_Hypothalamus
ENSG00000204520.12	MICA	-5.15743	-0.0321833	2.50362e-07	0.0681603	0.391136	2.13384e-18	#N/A	48	49	49	Brain_Hypothalamus
ENSG00000146205.13	ANO7	5.13756	0.0209709	2.78322e-07	0.122119	0.199234	2.24574e-09	#N/A	50	50	50	Brain_Hypothalamus
ENSG00000213689.11	TREX1	-5.1162	-0.073922	3.11753e-07	0.00898366	0.114082	2.00578e-05	#N/A	24	29	29	Brain_Hypothalamus
ENSG00000251417.2	RP11-1348G14.4	-5.10386	-0.0212916	3.32799e-07	0.116043	0.223076	1.14022e-09	#N/A	25	25	25	Brain_Hypothalamus
ENSG00000114988.11	LMAN2L	5.05507	0.243233	4.30241e-07	0.000821893	0.038513	0.0135362	#N/A	3	3	3	Brain_Hypothalamus
ENSG00000115604.10	IL18R1	5.04413	0.0360038	4.5559e-07	0.0446801	0.331603	1.66151e-15	#N/A	100	100	100	Brain_Hypothalamus
ENSG00000067208.14	EVI5	5.03984	0.104956	4.65918e-07	0.00445746	0.0453271	0.00916353	#N/A	49	49	49	Brain_Hypothalamus
ENSG00000101639.18	CEP192	-5.01605	-0.0195702	5.27455e-07	0.127359	0.539016	4.44882e-29	#N/A	43	43	43	Brain_Hypothalamus
ENSG00000145029.13	NICN1	4.96338	0.0706023	6.92762e-07	0.0108276	0.0352505	0.0215999	#N/A	67	67	67	Brain_Hypothalamus
ENSG00000177096.8	FAM109B	-4.95698	-0.248906	7.15972e-07	0.000710134	0.0384079	0.0172589	#N/A	4	5	5	Brain_Hypothalamus
ENSG00000172543.7	CTSW	-4.94477	-0.0331631	7.62332e-07	0.0382541	0.185444	1.94743e-08	#N/A	37	37	37	Brain_Hypothalamus
ENSG00000134905.16	CARS2	4.94163	0.189339	7.74724e-07	0.00138725	0.0276369	0.0412949	#N/A	10	10	10	Brain_Hypothalamus
ENSG00000273295.1	AP000350.5	4.93539	0.012282	7.99895e-07	0.306231	0.586282	9.6951e-34	#N/A	41	43	43	Brain_Hypothalamus
ENSG00000123342.15	MMP19	-4.93476	-0.0283485	8.02476e-07	0.0496914	0.0446286	0.0101967	#N/A	60	61	61	Brain_Hypothalamus
ENSG00000136881.11	BAAT	-4.93152	-0.0325504	8.1594e-07	0.0610449	0.15381	4.81908e-07	#N/A	58	58	58	Brain_Hypothalamus
ENSG00000099977.13	DDT	4.92479	0.0578102	8.44501e-07	0.0134094	0.219651	1.05958e-09	#N/A	4	5	5	Brain_Hypothalamus
ENSG00000128655.16	PDE11A	4.86042	0.0453239	1.17134e-06	0.0250591	0.0338759	0.0241579	#N/A	80	81	81	Brain_Hypothalamus
ENSG00000155542.11	SETD9	4.84798	0.0217635	1.24726e-06	0.108236	0.370786	2.11367e-17	#N/A	25	25	25	Brain_Hypothalamus
ENSG00000114735.9	HEMK1	-4.83809	-0.0754764	1.31095e-06	0.0116747	0.0402074	0.0134539	#N/A	30	52	52	Brain_Hypothalamus
ENSG00000158158.11	CNNM4	4.82333	0.133727	1.41183e-06	0.00245217	0.0407104	0.0143099	#N/A	10	12	12	Brain_Hypothalamus
ENSG00000125630.15	POLR1B	4.82189	0.0393005	1.42206e-06	0.0307685	0.273177	4.34536e-12	#N/A	9	9	9	Brain_Hypothalamus
ENSG00000187741.14	FANCA	-4.81825	-0.0715432	1.44825e-06	0.00857581	0.0481687	0.00790233	#N/A	9	9	9	Brain_Hypothalamus
ENSG00000244165.1	P2RY11	4.78794	0.0796274	1.68498e-06	0.00864883	0.161528	1.25307e-07	#N/A	6	6	6	Brain_Hypothalamus
ENSG00000237651.6	C2orf74	4.71359	0.0217093	2.43394e-06	0.0967832	0.508382	2.20125e-27	#N/A	27	27	27	Brain_Hypothalamus
ENSG00000176903.4	PNMA1	-4.69238	-0.15637	2.70043e-06	0.00199789	0.144738	1.28736e-06	#N/A	26	26	26	Brain_Hypothalamus
ENSG00000185917.13	SETD4	4.68966	0.0557649	2.73657e-06	0.0154836	0.205932	3.58328e-09	#N/A	22	22	22	Brain_Hypothalamus
ENSG00000263280.1	LA16c-325D7.2	4.64878	0.0217787	3.33911e-06	0.103504	0.240273	8.50662e-11	#N/A	40	41	41	Brain_Hypothalamus
ENSG00000159210.9	SNF8	4.6379	0.0348673	3.51971e-06	0.0302426	0.226123	5.7052e-10	#N/A	45	45	45	Brain_Hypothalamus
ENSG00000108556.7	CHRNE	4.62667	0.0223424	3.71587e-06	0.0982359	0.174043	8.11762e-08	#N/A	54	57	57	Brain_Hypothalamus
ENSG00000169689.14	CENPX	-4.60792	-0.0388775	4.06718e-06	0.0248111	0.226369	8.91724e-11	#N/A	15	15	15	Brain_Hypothalamus
ENSG00000127947.15	PTPN12	-4.59915	-0.112117	4.24217e-06	0.00275172	0.0471156	0.00819311	#N/A	9	9	9	Brain_Hypothalamus
ENSG00000223496.2	EXOSC6	-4.59725	-0.0235813	4.28099e-06	0.072097	0.445186	4.23619e-23	#N/A	8	8	8	Brain_Hypothalamus
ENSG00000140961.12	OSGIN1	-4.59257	-0.084722	4.37831e-06	0.00537352	0.0699999	0.00109622	#N/A	9	9	9	Brain_Hypothalamus
ENSG00000181315.10	ZNF322	-4.5903	-0.02048	4.42618e-06	0.107947	0.381876	8.67499e-19	#N/A	131	135	135	Brain_Hypothalamus
ENSG00000175164.13	ABO	4.56786	0.0324095	4.92738e-06	0.0393144	0.157946	3.01209e-07	#N/A	39	40	40	Brain_Hypothalamus
ENSG00000228126.1	FALEC	4.54635	0.0371838	5.45835e-06	0.0277277	0.0377796	0.0185987	#N/A	23	27	27	Brain_Hypothalamus
ENSG00000149485.18	FADS1	4.54258	0.0615904	5.55698e-06	0.0116459	0.131648	3.87535e-06	#N/A	10	10	10	Brain_Hypothalamus
ENSG00000204348.9	DXO	-4.47917	-0.0837988	7.49328e-06	0.00645167	0.0976908	0.000126905	#N/A	16	18	18	Brain_Hypothalamus
ENSG00000041357.15	PSMA4	4.4727	0.0450367	7.72373e-06	0.0217078	0.15144	5.86122e-07	#N/A	39	39	39	Brain_Hypothalamus
ENSG00000137804.12	NUSAP1	4.4727	0.0246149	7.72394e-06	0.0715921	0.229646	4.45163e-10	#N/A	25	26	26	Brain_Hypothalamus
ENSG00000198646.13	NCOA6	4.44045	0.0619575	8.97697e-06	0.007651	0.122927	8.67849e-06	#N/A	27	27	27	Brain_Hypothalamus
ENSG00000213889.10	PPM1N	-4.42362	-0.0612418	9.70622e-06	0.0126238	0.0346128	0.0254435	#N/A	35	35	35	Brain_Hypothalamus
ENSG00000253669.3	KB-1732A1.1	4.42183	0.045458	9.78702e-06	0.0188686	0.101578	6.94072e-05	#N/A	15	15	15	Brain_Hypothalamus
ENSG00000125637.15	PSD4	-4.41819	-0.0294882	9.95298e-06	0.0501287	0.243818	1.57894e-11	#N/A	23	23	23	Brain_Hypothalamus
ENSG00000043514.15	TRIT1	4.40632	0.0347765	1.0514e-05	0.0323178	0.261973	1.84077e-11	#N/A	39	39	39	Brain_Hypothalamus
ENSG00000101460.12	MAP1LC3A	-4.3942	-0.101869	1.11181e-05	0.00288757	0.0375004	0.0191581	#N/A	72	73	73	Brain_Hypothalamus
ENSG00000125611.15	CHCHD5	-4.37275	-0.0571405	1.22693e-05	0.0111371	0.0940404	0.000148401	#N/A	36	36	36	Brain_Hypothalamus
ENSG00000196437.10	ZNF569	-4.36089	-0.12034	1.29535e-05	0.00245029	0.0391168	0.0150438	#N/A	21	22	22	Brain_Hypothalamus
ENSG00000186594.14	MIR22HG	-4.34994	-0.0621755	1.36174e-05	0.0127435	0.0742567	0.000672571	#N/A	28	30	30	Brain_Hypothalamus
ENSG00000157837.15	SPPL3	16.7657	0.256779	4.34731e-63	0.00955912	0.0674421	0.00170142	#N/A	18	27	27	Brain_Putamen_basal_ganglia
ENSG00000115234.10	SNX17	-16.6165	-0.233903	5.2931e-62	0.0100458	0.0595211	0.00300362	#N/A	43	43	43	Brain_Putamen_basal_ganglia
ENSG00000175970.10	UNC119B	-12.7256	-0.331468	4.26084e-37	0.00758944	0.0872901	0.000288169	#N/A	34	36	36	Brain_Putamen_basal_ganglia
ENSG00000184949.15	FAM227A	-12.2733	-0.137816	1.25946e-34	0.0163501	0.152918	1.27288e-06	#N/A	16	16	16	Brain_Putamen_basal_ganglia
ENSG00000237541.3	HLA-DQA2	12.2509	0.0417677	1.66135e-34	0.15717	0.476271	1.54805e-23	#N/A	40	41	41	Brain_Putamen_basal_ganglia
ENSG00000204525.16	HLA-C	-11.9086	-0.0670166	1.06782e-32	0.0642429	0.417012	2.43954e-19	#N/A	19	19	19	Brain_Putamen_basal_ganglia
ENSG00000204371.11	EHMT2	11.528	0.205024	9.53343e-31	0.00660369	0.208674	3.35211e-09	#N/A	9	9	9	Brain_Putamen_basal_ganglia
ENSG00000100201.20	DDX17	-11.0847	-0.258982	1.48814e-28	0.00382481	0.0498713	0.00661241	#N/A	14	14	14	Brain_Putamen_basal_ganglia
ENSG00000134575.9	ACP2	11.077	0.273627	1.62132e-28	0.00367023	0.0297191	0.0361993	#N/A	3	3	3	Brain_Putamen_basal_ganglia
ENSG00000196126.11	HLA-DRB1	-10.0788	-0.0546105	6.8531e-24	0.0661692	0.427395	4.67099e-20	#N/A	100	102	102	Brain_Putamen_basal_ganglia
ENSG00000204410.14	MSH5	9.72386	0.177881	2.38563e-22	0.00453061	0.0718755	0.000880884	#N/A	14	15	15	Brain_Putamen_basal_ganglia
ENSG00000157895.11	C12orf43	9.49127	0.344982	2.28235e-21	0.00219618	0.0454038	0.0105957	#N/A	3	3	3	Brain_Putamen_basal_ganglia
ENSG00000240053.8	LY6G5B	-9.42878	-0.103139	4.14902e-21	0.0169386	0.275786	6.60425e-12	#N/A	36	37	37	Brain_Putamen_basal_ganglia
ENSG00000213676.10	ATF6B	9.41926	0.118332	4.5429e-21	0.0133565	0.129531	2.80339e-06	#N/A	12	13	13	Brain_Putamen_basal_ganglia
ENSG00000213625.8	LEPROT	-9.00265	-0.0893254	2.20324e-19	0.0176092	0.333951	6.68703e-15	#N/A	16	16	16	Brain_Putamen_basal_ganglia
ENSG00000004534.14	RBM6	-8.90028	-0.059339	5.57057e-19	0.0491299	0.253855	5.46515e-12	#N/A	98	142	142	Brain_Putamen_basal_ganglia
ENSG00000214530.8	STARD10	8.82453	0.0615575	1.09919e-18	0.0451243	0.283087	2.83453e-13	#N/A	14	15	15	Brain_Putamen_basal_ganglia
ENSG00000204257.14	HLA-DMA	-8.77627	-0.139447	1.6899e-18	0.00461017	0.0957825	0.000176035	#N/A	2	2	2	Brain_Putamen_basal_ganglia
ENSG00000164068.15	RNF123	8.74804	0.229315	2.17099e-18	0.0029604	0.0912971	0.000155024	#N/A	18	18	18	Brain_Putamen_basal_ganglia
ENSG00000244219.6	GS1-259H13.2	8.55402	0.127708	1.18875e-17	0.0110512	0.096058	0.000165877	#N/A	17	17	17	Brain_Putamen_basal_ganglia
ENSG00000170684.8	ZNF296	8.54011	0.0690951	1.34097e-17	0.0295799	0.114198	2.44439e-05	#N/A	44	44	44	Brain_Putamen_basal_ganglia
ENSG00000274029.1	RP11-340F14.6	8.46969	0.108203	2.46046e-17	0.0123633	0.0489326	0.00843512	#N/A	53	55	55	Brain_Putamen_basal_ganglia
ENSG00000179344.16	HLA-DQB1	-8.2855	-0.0263276	1.17614e-16	0.200101	0.49484	1.90583e-25	#N/A	81	81	81	Brain_Putamen_basal_ganglia
ENSG00000176920.11	FUT2	8.12105	0.081539	4.62185e-16	0.0235464	0.0565843	0.00419877	#N/A	28	28	28	Brain_Putamen_basal_ganglia
ENSG00000197165.10	SULT1A2	7.86196	0.0343956	3.78161e-15	0.0921206	0.291226	1.55949e-12	#N/A	10	10	10	Brain_Putamen_basal_ganglia
ENSG00000198218.10	QRICH1	-7.8618	-0.10729	3.78642e-15	0.0109928	0.0660248	0.00137313	#N/A	46	46	46	Brain_Putamen_basal_ganglia
ENSG00000213672.7	NCKIPSD	7.86139	0.0537173	3.79883e-15	0.0466343	0.476437	3.95743e-24	#N/A	18	18	18	Brain_Putamen_basal_ganglia
ENSG00000198502.5	HLA-DRB5	-7.83061	-0.0268241	4.85517e-15	0.192485	0.616246	2.08552e-36	#N/A	51	54	54	Brain_Putamen_basal_ganglia
ENSG00000213658.11	LAT	7.79884	0.13707	6.24767e-15	0.00638594	0.0625985	0.00223496	#N/A	26	26	26	Brain_Putamen_basal_ganglia
ENSG00000145692.14	BHMT	-7.77522	-0.0698075	7.53146e-15	0.0244201	0.083699	0.000375348	#N/A	27	27	27	Brain_Putamen_basal_ganglia
ENSG00000066651.18	TRMT11	7.71151	0.0762675	1.24333e-14	0.0212069	0.104596	6.65581e-05	#N/A	27	28	28	Brain_Putamen_basal_ganglia
ENSG00000122971.8	ACADS	-7.59564	-0.0959132	3.06278e-14	0.0126414	0.151296	9.91564e-07	#N/A	48	49	49	Brain_Putamen_basal_ganglia
ENSG00000233232.6	NPIPB7	-7.54491	-0.0751013	4.52587e-14	0.0178928	0.0669867	0.00165386	#N/A	8	8	8	Brain_Putamen_basal_ganglia
ENSG00000178952.10	TUFM	7.5408	0.118253	4.67112e-14	0.00821107	0.20786	4.75365e-09	#N/A	21	21	21	Brain_Putamen_basal_ganglia
ENSG00000244731.7	C4A	7.49104	0.0561638	6.8328e-14	0.0237316	0.106002	5.57026e-05	#N/A	59	59	59	Brain_Putamen_basal_ganglia
ENSG00000176909.11	MAMSTR	7.48528	0.0475943	7.13949e-14	0.0612545	0.112837	1.89578e-05	#N/A	46	46	46	Brain_Putamen_basal_ganglia
ENSG00000173273.15	TNKS	-7.42847	-0.0781625	1.09864e-13	0.0174993	0.111476	2.42575e-05	#N/A	24	24	24	Brain_Putamen_basal_ganglia
ENSG00000138031.14	ADCY3	-7.41162	-0.10276	1.24763e-13	0.0114165	0.116298	2.39945e-05	#N/A	21	23	23	Brain_Putamen_basal_ganglia
ENSG00000231852.6	CYP21A2	7.41072	0.0778919	1.25616e-13	0.0203591	0.10946	3.51023e-05	#N/A	12	12	12	Brain_Putamen_basal_ganglia
ENSG00000134569.9	LRP4	-7.32095	-0.251631	2.46224e-13	0.00188063	0.0799305	0.000565881	#N/A	13	15	15	Brain_Putamen_basal_ganglia
ENSG00000132837.14	DMGDH	-7.30898	-0.106037	2.69181e-13	0.00949059	0.135838	4.74286e-06	#N/A	7	7	7	Brain_Putamen_basal_ganglia
ENSG00000159228.12	CBR1	7.27085	0.090566	3.57229e-13	0.0150329	0.267983	8.17578e-12	#N/A	23	23	23	Brain_Putamen_basal_ganglia
ENSG00000224389.8	C4B	-7.24923	-0.089979	4.19139e-13	0.0122326	0.13741	4.69515e-06	#N/A	68	68	68	Brain_Putamen_basal_ganglia
ENSG00000196683.10	TOMM7	7.13029	0.0863583	1.00157e-12	0.0125533	0.19929	1.65907e-08	#N/A	39	39	39	Brain_Putamen_basal_ganglia
ENSG00000230725.5	RP4-738P15.1	-7.05353	-0.162092	1.74437e-12	0.0040389	0.041949	0.011442	#N/A	28	28	28	Brain_Putamen_basal_ganglia
ENSG00000251417.2	RP11-1348G14.4	-7.04572	-0.0624573	1.8451e-12	0.0254471	0.108603	4.43064e-05	#N/A	27	27	27	Brain_Putamen_basal_ganglia
ENSG00000226913.1	BSN-AS2	-7.00246	-0.0643685	2.51506e-12	0.0254567	0.0902883	0.000112234	#N/A	30	30	30	Brain_Putamen_basal_ganglia
ENSG00000165916.8	PSMC3	7.00149	0.167315	2.53246e-12	0.0030359	0.0630858	0.00262845	#N/A	18	21	21	Brain_Putamen_basal_ganglia
ENSG00000196502.11	SULT1A1	-6.99326	-0.0625946	2.68567e-12	0.0218438	0.0347599	0.0180603	#N/A	14	15	15	Brain_Putamen_basal_ganglia
ENSG00000261390.5	MAFTRR	-6.97756	-0.0474505	3.0036e-12	0.0482626	0.238628	1.43494e-10	#N/A	12	12	12	Brain_Putamen_basal_ganglia
ENSG00000011295.15	TTC19	6.86758	0.10761	6.53009e-12	0.00690128	0.188501	3.98012e-08	#N/A	36	36	36	Brain_Putamen_basal_ganglia
ENSG00000174939.10	ASPHD1	6.70772	0.10407	1.97683e-11	0.00907561	0.088901	0.000275899	#N/A	19	21	21	Brain_Putamen_basal_ganglia
ENSG00000221843.4	C2orf16	-6.67415	-0.0987432	2.48676e-11	0.0108363	0.061151	0.00271627	#N/A	13	14	14	Brain_Putamen_basal_ganglia
ENSG00000148384.12	INPP5E	-6.66142	-0.0704482	2.71203e-11	0.0193599	0.1808	6.59702e-08	#N/A	14	14	14	Brain_Putamen_basal_ganglia
ENSG00000109919.9	MTCH2	6.56516	0.0703385	5.19787e-11	0.0159536	0.174705	6.48699e-08	#N/A	13	13	13	Brain_Putamen_basal_ganglia
ENSG00000177352.9	CCDC71	-6.53742	-0.0976883	6.25894e-11	0.00981722	0.0895928	0.000285487	#N/A	28	28	28	Brain_Putamen_basal_ganglia
ENSG00000114054.13	PCCB	-6.53022	-0.0564506	6.56738e-11	0.0260565	0.142607	1.77452e-06	#N/A	42	42	42	Brain_Putamen_basal_ganglia
ENSG00000100997.18	ABHD12	6.50288	0.135385	7.87955e-11	0.00475192	0.133602	5.98383e-06	#N/A	38	38	38	Brain_Putamen_basal_ganglia
ENSG00000233393.1	AP000688.29	6.50006	0.0452642	8.02898e-11	0.0497186	0.227003	1.2119e-09	#N/A	22	22	22	Brain_Putamen_basal_ganglia
ENSG00000137411.16	VARS2	6.47051	0.0512349	9.76713e-11	0.0333565	0.347171	7.44793e-16	#N/A	56	56	56	Brain_Putamen_basal_ganglia
ENSG00000196993.8	NPIPB9	-6.34786	-0.0566304	2.18331e-10	0.0220408	0.0698781	0.00145627	#N/A	14	14	14	Brain_Putamen_basal_ganglia
ENSG00000206344.7	HCG27	6.24298	0.0314724	4.29323e-10	0.0905307	0.223299	4.14366e-10	#N/A	41	45	45	Brain_Putamen_basal_ganglia
ENSG00000090273.13	NUDC	-6.23974	-0.103012	4.38309e-10	0.00658483	0.0974557	0.000131691	#N/A	30	31	31	Brain_Putamen_basal_ganglia
ENSG00000100413.16	POLR3H	6.2208	0.0743821	4.94631e-10	0.0117283	0.178614	5.09594e-08	#N/A	58	59	59	Brain_Putamen_basal_ganglia
ENSG00000134905.16	CARS2	6.18428	0.149842	6.23851e-10	0.0033465	0.0558859	0.00405362	#N/A	7	7	7	Brain_Putamen_basal_ganglia
ENSG00000214941.7	ZSWIM7	-6.17445	-0.0492174	6.63945e-10	0.0263288	0.199212	1.43214e-08	#N/A	40	40	40	Brain_Putamen_basal_ganglia
ENSG00000226686.7	LINC01535	6.1707	0.0134184	6.79864e-10	0.394488	0.676281	1.98341e-44	#N/A	58	60	60	Brain_Putamen_basal_ganglia
ENSG00000143515.16	ATP8B2	-6.15964	-0.290015	7.29111e-10	0.00107509	0.0359664	0.0230063	#N/A	4	4	4	Brain_Putamen_basal_ganglia
ENSG00000115604.10	IL18R1	6.15425	0.0249042	7.54355e-10	0.133864	0.5663	3.03434e-31	#N/A	44	44	44	Brain_Putamen_basal_ganglia
ENSG00000093167.17	LRRFIP2	-6.07767	-0.0778978	1.21943e-09	0.00999985	0.140827	2.94285e-06	#N/A	23	23	23	Brain_Putamen_basal_ganglia
ENSG00000272823.1	RP11-295M18.6	6.03755	0.0291628	1.56469e-09	0.071447	0.152379	1.30872e-06	#N/A	22	22	22	Brain_Putamen_basal_ganglia
ENSG00000239467.5	AC007405.6	-6.03383	-0.062813	1.60118e-09	0.0191092	0.129773	1.02365e-05	#N/A	33	33	33	Brain_Putamen_basal_ganglia
ENSG00000257218.5	GATC	-6.02587	-0.019798	1.68197e-09	0.204733	0.597499	1.44345e-33	#N/A	45	45	45	Brain_Putamen_basal_ganglia
ENSG00000177628.15	GBA	6.00607	0.166404	1.90078e-09	0.00261145	0.0479442	0.00703717	#N/A	2	2	2	Brain_Putamen_basal_ganglia
ENSG00000134548.9	SPX	6.0056	0.12981	1.90627e-09	0.00475907	0.0950021	0.000159786	#N/A	34	34	34	Brain_Putamen_basal_ganglia
ENSG00000149084.12	HSD17B12	-5.99589	-0.0267314	2.02372e-09	0.098224	0.580388	6.82071e-32	#N/A	35	35	35	Brain_Putamen_basal_ganglia
ENSG00000104892.16	KLC3	5.99453	0.0447764	2.04073e-09	0.0358044	0.235254	4.71444e-10	#N/A	13	13	13	Brain_Putamen_basal_ganglia
ENSG00000242252.1	BGLAP	-5.96098	-0.14134	2.50724e-09	0.00367905	0.0509242	0.00559336	#N/A	3	3	3	Brain_Putamen_basal_ganglia
ENSG00000248144.5	ADH1C	-5.95993	-0.0275431	2.52341e-09	0.0861109	0.191171	3.86753e-08	#N/A	89	89	89	Brain_Putamen_basal_ganglia
ENSG00000115602.16	IL1RL1	5.9244	0.0263558	3.13431e-09	0.108624	0.507073	2.03479e-25	#N/A	44	44	44	Brain_Putamen_basal_ganglia
ENSG00000184110.14	EIF3C	5.91108	0.0356467	3.3987e-09	0.0626767	0.0426331	0.0145929	#N/A	57	59	59	Brain_Putamen_basal_ganglia
ENSG00000100372.14	SLC25A17	5.88706	0.0699716	3.93119e-09	0.013872	0.107658	6.84414e-05	#N/A	28	28	28	Brain_Putamen_basal_ganglia
ENSG00000169592.14	INO80E	-5.88071	-0.082097	4.08519e-09	0.0106608	0.102637	7.13282e-05	#N/A	35	38	38	Brain_Putamen_basal_ganglia
ENSG00000142599.17	RERE	5.87529	0.0761649	4.22094e-09	0.0120473	0.0845145	0.000313239	#N/A	18	18	18	Brain_Putamen_basal_ganglia
ENSG00000100239.15	PPP6R2	-5.8564	-0.054359	4.73017e-09	0.0249788	0.284612	1.06869e-13	#N/A	25	25	25	Brain_Putamen_basal_ganglia
ENSG00000231925.11	TAPBP	5.85454	0.0899062	4.78321e-09	0.00727806	0.0497934	0.00506274	#N/A	41	42	42	Brain_Putamen_basal_ganglia
ENSG00000125458.6	NT5C	-5.82154	-0.101071	5.83088e-09	0.00606463	0.113133	3.10576e-05	#N/A	21	21	21	Brain_Putamen_basal_ganglia
ENSG00000139343.10	SNRPF	-5.78539	-0.0759054	7.23429e-09	0.0101557	0.0416135	0.0121347	#N/A	18	19	19	Brain_Putamen_basal_ganglia
ENSG00000196968.10	FUT11	5.77134	0.0857583	7.86419e-09	0.00897551	0.0457827	0.00900767	#N/A	19	19	19	Brain_Putamen_basal_ganglia
ENSG00000204536.13	CCHCR1	-5.74729	-0.0622607	9.06843e-09	0.0109784	0.211871	4.95658e-09	#N/A	20	21	21	Brain_Putamen_basal_ganglia
ENSG00000238078.1	LINC01352	5.74457	0.0251039	9.21527e-09	0.0847688	0.257144	2.84906e-11	#N/A	18	18	18	Brain_Putamen_basal_ganglia
ENSG00000111725.10	PRKAB1	-5.72276	-0.116598	1.04807e-08	0.004703	0.0578345	0.00392448	#N/A	44	44	44	Brain_Putamen_basal_ganglia
ENSG00000172500.12	FIBP	5.71371	0.0834054	1.10536e-08	0.00857309	0.194435	3.0388e-09	#N/A	29	29	29	Brain_Putamen_basal_ganglia
ENSG00000178252.17	WDR6	-5.70591	-0.0517752	1.15725e-08	0.0233717	0.191671	2.56867e-08	#N/A	82	84	84	Brain_Putamen_basal_ganglia
ENSG00000146540.14	C7orf50	5.70248	0.0876707	1.18076e-08	0.00928767	0.181018	6.50186e-08	#N/A	7	7	7	Brain_Putamen_basal_ganglia
ENSG00000172818.9	OVOL1	5.69845	0.0721994	1.20905e-08	0.0117342	0.0714206	0.00120256	#N/A	10	10	10	Brain_Putamen_basal_ganglia
ENSG00000227888.4	FAM66A	5.69785	0.0208677	1.21328e-08	0.184766	0.33568	5.01341e-15	#N/A	31	32	32	Brain_Putamen_basal_ganglia
ENSG00000154319.14	FAM167A	-5.6865	-0.053495	1.29672e-08	0.0279914	0.168285	1.86165e-07	#N/A	41	41	41	Brain_Putamen_basal_ganglia
ENSG00000138092.10	CENPO	-5.66262	-0.119065	1.49076e-08	0.00470442	0.103883	7.78923e-05	#N/A	8	8	8	Brain_Putamen_basal_ganglia
ENSG00000241468.7	ATP5J2	5.63719	0.13915	1.72844e-08	0.00378037	0.135093	5.40458e-06	#N/A	29	29	29	Brain_Putamen_basal_ganglia
ENSG00000125618.16	PAX8	5.58569	0.0187144	2.3277e-08	0.151801	0.290872	1.82511e-13	#N/A	27	28	28	Brain_Putamen_basal_ganglia
ENSG00000181315.10	ZNF322	-5.54262	-0.0433324	2.97971e-08	0.0348025	0.188103	1.861e-08	#N/A	34	35	35	Brain_Putamen_basal_ganglia
ENSG00000163586.9	FABP1	-5.53923	-0.0199898	3.03805e-08	0.146415	0.376071	1.37217e-17	#N/A	17	19	19	Brain_Putamen_basal_ganglia
ENSG00000142233.11	NTN5	5.52324	0.0450606	3.32802e-08	0.034893	0.108527	9.85617e-06	#N/A	51	52	52	Brain_Putamen_basal_ganglia
ENSG00000157322.17	CLEC18A	-5.51236	-0.0205209	3.54062e-08	0.142524	0.385582	4.80925e-18	#N/A	19	19	19	Brain_Putamen_basal_ganglia
ENSG00000146205.13	ANO7	5.45187	0.0301813	4.98437e-08	0.0641586	0.23432	7.54451e-11	#N/A	35	36	36	Brain_Putamen_basal_ganglia
ENSG00000100162.14	CENPM	5.44714	0.0499089	5.11869e-08	0.0223025	0.123317	1.2587e-05	#N/A	47	47	47	Brain_Putamen_basal_ganglia
ENSG00000167491.17	GATAD2A	-5.43553	-0.158501	5.46344e-08	0.00247069	0.0287254	0.0433182	#N/A	24	24	24	Brain_Putamen_basal_ganglia
ENSG00000164989.16	CCDC171	-5.40165	-0.0274006	6.60308e-08	0.0723548	0.226429	1.10726e-09	#N/A	58	59	59	Brain_Putamen_basal_ganglia
ENSG00000115677.16	HDLBP	-5.39896	-0.0869576	6.70277e-08	0.00840643	0.0779644	0.000680882	#N/A	19	19	19	Brain_Putamen_basal_ganglia
ENSG00000167077.12	MEI1	5.36992	0.0220485	7.8772e-08	0.109248	0.0866763	0.00028817	#N/A	131	134	134	Brain_Putamen_basal_ganglia
ENSG00000152219.4	ARL14EP	-5.35694	-0.181402	8.46446e-08	0.00163953	0.0829655	0.000354883	#N/A	16	16	16	Brain_Putamen_basal_ganglia
ENSG00000263001.5	GTF2I	-5.34735	-0.0849165	8.92527e-08	0.0114248	0.164622	1.90639e-07	#N/A	19	20	20	Brain_Putamen_basal_ganglia
ENSG00000154328.15	NEIL2	5.26274	0.0537708	1.41923e-07	0.0261462	0.197678	4.50475e-09	#N/A	36	36	36	Brain_Putamen_basal_ganglia
ENSG00000232629.8	HLA-DQB2	5.23016	0.0291489	1.69359e-07	0.059813	0.254034	5.09401e-12	#N/A	15	16	16	Brain_Putamen_basal_ganglia
ENSG00000168813.16	ZNF507	-5.21751	-0.0703456	1.81347e-07	0.0119475	0.15583	6.16934e-07	#N/A	18	18	18	Brain_Putamen_basal_ganglia
ENSG00000240972.1	MIF	5.20474	0.0594939	1.94264e-07	0.014543	0.0544807	0.00388636	#N/A	30	30	30	Brain_Putamen_basal_ganglia
ENSG00000178467.17	P4HTM	5.1948	0.215675	2.04942e-07	0.00119753	0.091995	0.000203045	#N/A	62	62	62	Brain_Putamen_basal_ganglia
ENSG00000124562.9	SNRPC	-5.17606	-0.0468575	2.26616e-07	0.0248467	0.308796	1.56214e-13	#N/A	51	52	52	Brain_Putamen_basal_ganglia
ENSG00000101004.14	NINL	5.16442	0.0386845	2.41181e-07	0.0337656	0.237575	3.86866e-10	#N/A	24	26	26	Brain_Putamen_basal_ganglia
ENSG00000233276.3	GPX1	-5.14523	-0.105731	2.67193e-07	0.00511584	0.0949691	0.000148389	#N/A	28	28	28	Brain_Putamen_basal_ganglia
ENSG00000196275.13	GTF2IRD2	-5.1364	-0.0223234	2.80052e-07	0.133735	0.444962	4.61925e-21	#N/A	42	43	43	Brain_Putamen_basal_ganglia
ENSG00000196260.4	SFTA2	5.09404	0.0510255	3.50507e-07	0.0199414	0.177468	1.05113e-07	#N/A	13	13	13	Brain_Putamen_basal_ganglia
ENSG00000111775.2	COX6A1	-5.06483	-0.113885	4.08768e-07	0.00419232	0.0695401	0.000947306	#N/A	27	27	27	Brain_Putamen_basal_ganglia
ENSG00000065060.16	UHRF1BP1	5.03967	0.0286745	4.66327e-07	0.0640297	0.281857	3.4998e-12	#N/A	53	55	55	Brain_Putamen_basal_ganglia
ENSG00000134222.16	PSRC1	5.00238	0.092366	5.66265e-07	0.00785405	0.053837	0.00508936	#N/A	26	26	26	Brain_Putamen_basal_ganglia
ENSG00000272221.1	XXbac-BPG181B23.7	-4.96452	-0.0180887	6.88713e-07	0.192156	0.408534	1.15116e-19	#N/A	100	104	104	Brain_Putamen_basal_ganglia
ENSG00000175170.14	FAM182B	4.95436	0.0240574	7.25691e-07	0.0959871	0.149461	1.67702e-06	#N/A	56	57	57	Brain_Putamen_basal_ganglia
ENSG00000273295.1	AP000350.5	4.95225	0.010657	7.33616e-07	0.394603	0.720299	5.49064e-50	#N/A	39	39	39	Brain_Putamen_basal_ganglia
ENSG00000099977.13	DDT	4.94307	0.078669	7.69026e-07	0.0072516	0.169076	2.48292e-07	#N/A	5	5	5	Brain_Putamen_basal_ganglia
ENSG00000132470.13	ITGB4	4.91575	0.131208	8.84444e-07	0.00284818	0.0351736	0.0201721	#N/A	27	27	27	Brain_Putamen_basal_ganglia
ENSG00000164404.8	GDF9	-4.9096	-0.0749402	9.12644e-07	0.00989986	0.0990678	6.73507e-05	#N/A	17	17	17	Brain_Putamen_basal_ganglia
ENSG00000110871.14	COQ5	4.90869	0.0433331	9.16854e-07	0.0262722	0.189804	2.72089e-08	#N/A	34	35	35	Brain_Putamen_basal_ganglia
ENSG00000197943.9	PLCG2	-4.88347	-0.0189369	1.04233e-06	0.139584	0.219421	1.50063e-09	#N/A	34	34	34	Brain_Putamen_basal_ganglia
ENSG00000228022.5	HCG20	4.87094	0.0264556	1.1107e-06	0.0644783	0.0608033	0.00310712	#N/A	53	53	53	Brain_Putamen_basal_ganglia
ENSG00000149499.11	EML3	-4.86145	-0.0760026	1.16529e-06	0.00801692	0.205701	2.82433e-09	#N/A	20	20	20	Brain_Putamen_basal_ganglia
ENSG00000166997.7	CNPY4	4.83722	0.163777	1.3167e-06	0.00186177	0.0331747	0.0257013	#N/A	9	9	9	Brain_Putamen_basal_ganglia
ENSG00000171695.10	LKAAEAR1	4.83559	0.0408942	1.32749e-06	0.0347795	0.218495	1.06938e-09	#N/A	16	16	16	Brain_Putamen_basal_ganglia
ENSG00000170291.14	ELP5	-4.8335	-0.0460204	1.34154e-06	0.0214879	0.213669	4.65076e-09	#N/A	27	28	28	Brain_Putamen_basal_ganglia
ENSG00000135334.8	AKIRIN2	-4.7797	-0.101602	1.75557e-06	0.00419518	0.0285308	0.0427247	#N/A	32	32	32	Brain_Putamen_basal_ganglia
ENSG00000197557.6	TTC30A	4.75792	0.0798069	1.95598e-06	0.00721895	0.0502204	0.00616631	#N/A	48	48	48	Brain_Putamen_basal_ganglia
ENSG00000025156.12	HSF2	4.75156	0.133343	2.01855e-06	0.00220444	0.0479949	0.00911302	#N/A	3	3	3	Brain_Putamen_basal_ganglia
ENSG00000235209.1	CTA-150C2.13	-4.73581	-0.0146323	2.18182e-06	0.206913	0.315305	4.40397e-14	#N/A	79	82	82	Brain_Putamen_basal_ganglia
ENSG00000101639.18	CEP192	-4.73305	-0.0177027	2.21175e-06	0.155775	0.480033	1.64698e-23	#N/A	28	29	29	Brain_Putamen_basal_ganglia
ENSG00000119661.14	DNAL1	4.7266	0.0935541	2.28314e-06	0.00562638	0.0466359	0.00815253	#N/A	22	22	22	Brain_Putamen_basal_ganglia
ENSG00000275764.1	RP11-582E3.6	-4.70446	-0.0197359	2.54543e-06	0.118586	0.160627	6.82989e-07	#N/A	147	150	150	Brain_Putamen_basal_ganglia
ENSG00000188986.6	NELFB	-4.70067	-0.367947	2.59315e-06	0.00031179	0.148629	4.99654e-07	#N/A	6	17	17	Brain_Putamen_basal_ganglia
ENSG00000169689.14	CENPX	-4.68984	-0.0330695	2.73421e-06	0.0348569	0.321472	3.69759e-15	#N/A	6	6	6	Brain_Putamen_basal_ganglia
ENSG00000197457.9	STMN3	-4.67752	-0.0802871	2.90367e-06	0.00809007	0.088922	0.000248827	#N/A	27	27	27	Brain_Putamen_basal_ganglia
ENSG00000204463.12	BAG6	4.64134	0.0321999	3.46163e-06	0.0323979	0.174686	2.03072e-08	#N/A	37	38	38	Brain_Putamen_basal_ganglia
ENSG00000168803.14	ADAL	-4.63318	-0.0209961	3.60093e-06	0.10101	0.284795	2.20889e-12	#N/A	51	52	52	Brain_Putamen_basal_ganglia
ENSG00000234745.10	HLA-B	4.60826	0.0660619	4.06059e-06	0.00924582	0.0327324	0.0309271	#N/A	39	39	39	Brain_Putamen_basal_ganglia
ENSG00000183336.8	BOLA2	-4.59002	-0.0320731	4.43204e-06	0.0431851	0.170316	2.05352e-07	#N/A	11	11	11	Brain_Putamen_basal_ganglia
ENSG00000155542.11	SETD9	4.58956	0.0184922	4.44182e-06	0.113634	0.424324	4.09729e-20	#N/A	63	63	63	Brain_Putamen_basal_ganglia
ENSG00000223496.2	EXOSC6	-4.55968	-0.0226575	5.12325e-06	0.0805267	0.540099	1.12446e-29	#N/A	12	12	12	Brain_Putamen_basal_ganglia
ENSG00000099974.7	DDTL	-4.54649	-0.0649064	5.45471e-06	0.00948358	0.0293127	0.0428803	#N/A	11	11	11	Brain_Putamen_basal_ganglia
ENSG00000213689.11	TREX1	-4.53404	-0.0550178	5.78661e-06	0.0139031	0.183687	6.73819e-08	#N/A	12	13	13	Brain_Putamen_basal_ganglia
ENSG00000159210.9	SNF8	4.53374	0.0594711	5.79476e-06	0.00986111	0.171702	1.43565e-07	#N/A	8	8	8	Brain_Putamen_basal_ganglia
ENSG00000272787.1	KB-226F1.2	-4.52005	-0.0489892	6.18237e-06	0.0152886	0.0477972	0.00931485	#N/A	15	17	17	Brain_Putamen_basal_ganglia
ENSG00000163933.9	RFT1	-4.5115	-0.0250907	6.43699e-06	0.0787314	0.333105	6.88798e-15	#N/A	27	29	29	Brain_Putamen_basal_ganglia
ENSG00000158113.12	LRRC43	-4.509	-0.154658	6.51339e-06	0.0016173	0.0316784	0.0319783	#N/A	6	11	11	Brain_Putamen_basal_ganglia
ENSG00000172803.17	SNX32	4.50351	0.0616711	6.68404e-06	0.00935091	0.193259	4.85775e-09	#N/A	17	17	17	Brain_Putamen_basal_ganglia
ENSG00000268401.1	CTC-344H19.4	4.48852	0.0354053	7.1719e-06	0.0333197	0.189403	4.09633e-08	#N/A	38	39	39	Brain_Putamen_basal_ganglia
ENSG00000137806.8	NDUFAF1	-4.47693	-0.0390999	7.57252e-06	0.0242566	0.184004	6.86081e-08	#N/A	26	26	26	Brain_Putamen_basal_ganglia
ENSG00000137804.12	NUSAP1	4.47443	0.0205741	7.66171e-06	0.0870428	0.333361	7.66261e-15	#N/A	19	19	19	Brain_Putamen_basal_ganglia
ENSG00000198093.10	ZNF649	-4.46731	-0.0397118	7.92112e-06	0.026803	0.103038	8.64311e-05	#N/A	58	63	63	Brain_Putamen_basal_ganglia
ENSG00000204428.12	LY6G5C	-4.46367	-0.018154	8.05674e-06	0.119415	0.498794	9.30401e-26	#N/A	23	27	27	Brain_Putamen_basal_ganglia
ENSG00000164081.12	TEX264	4.46148	0.112909	8.13953e-06	0.00369297	0.0597615	0.00168109	#N/A	5	5	5	Brain_Putamen_basal_ganglia
ENSG00000158296.13	SLC13A3	4.44877	0.076153	8.63632e-06	0.00773788	0.0859611	0.00028444	#N/A	29	29	29	Brain_Putamen_basal_ganglia
ENSG00000213523.10	SRA1	-4.43567	-0.060445	9.17872e-06	0.00828035	0.0982149	0.000126227	#N/A	44	45	45	Brain_Putamen_basal_ganglia
ENSG00000169750.8	RAC3	-4.43104	-0.0982482	9.37778e-06	0.00333049	0.0830588	0.000465104	#N/A	5	5	5	Brain_Putamen_basal_ganglia
ENSG00000198231.12	DDX42	4.39692	0.0546253	1.09799e-05	0.0135362	0.113139	3.68551e-05	#N/A	41	41	41	Brain_Putamen_basal_ganglia
ENSG00000175970.10	UNC119B	-20.293	-0.232514	1.48123e-91	0.0162772	0.0887883	0.00168714	#N/A	21	21	21	Brain_Spinal_cord_cervical_c-1
ENSG00000139714.12	MORN3	-18.0167	-0.879801	1.44152e-72	0.00100537	0.0552822	0.0167527	#N/A	7	7	7	Brain_Spinal_cord_cervical_c-1
ENSG00000237541.3	HLA-DQA2	12.7819	0.0402596	2.07081e-37	0.195188	0.511122	1.4928e-20	#N/A	67	69	69	Brain_Spinal_cord_cervical_c-1
ENSG00000224389.8	C4B	-11.7375	-0.173745	8.18642e-32	0.00884174	0.0469789	0.0200762	#N/A	30	30	30	Brain_Spinal_cord_cervical_c-1
ENSG00000204525.16	HLA-C	-10.8778	-0.0395111	1.47101e-27	0.142879	0.374043	7.8062e-13	#N/A	53	54	54	Brain_Spinal_cord_cervical_c-1
ENSG00000183682.7	BMP8A	10.511	0.213368	7.68445e-26	0.00519737	0.0366672	0.0491974	#N/A	9	9	9	Brain_Spinal_cord_cervical_c-1
ENSG00000138085.16	ATRAID	-10.3465	-0.223077	4.34189e-25	0.00453504	0.0681429	0.00583117	#N/A	22	22	22	Brain_Spinal_cord_cervical_c-1
ENSG00000213676.10	ATF6B	9.98942	0.0550057	1.69574e-23	0.0778281	0.452182	2.76036e-16	#N/A	18	19	19	Brain_Spinal_cord_cervical_c-1
ENSG00000173273.15	TNKS	-9.49477	-0.084631	2.20692e-21	0.0216615	0.243693	4.38154e-08	#N/A	20	20	20	Brain_Spinal_cord_cervical_c-1
ENSG00000122971.8	ACADS	-9.47869	-0.1205	2.57489e-21	0.0134176	0.0411518	0.0345977	#N/A	17	17	17	Brain_Spinal_cord_cervical_c-1
ENSG00000004534.14	RBM6	-8.95559	-0.0660654	3.37925e-19	0.0370964	0.261241	2.12377e-08	#N/A	36	42	42	Brain_Spinal_cord_cervical_c-1
ENSG00000164068.15	RNF123	8.94116	0.219219	3.85114e-19	0.00358529	0.0441597	0.0323252	#N/A	35	35	35	Brain_Spinal_cord_cervical_c-1
ENSG00000204438.10	GPANK1	8.88565	0.150985	6.35465e-19	0.00790359	0.0492256	0.0203002	#N/A	18	18	18	Brain_Spinal_cord_cervical_c-1
ENSG00000186074.18	CD300LF	8.76594	0.0867327	1.85218e-18	0.0200511	0.148082	4.48846e-05	#N/A	27	27	27	Brain_Spinal_cord_cervical_c-1
ENSG00000104859.14	CLASRP	-8.60521	-0.110679	7.61778e-18	0.0125227	0.205945	7.5308e-07	#N/A	25	25	25	Brain_Spinal_cord_cervical_c-1
ENSG00000196126.11	HLA-DRB1	-8.53278	-0.0841793	1.42874e-17	0.0191641	0.119356	9.27961e-05	#N/A	45	45	45	Brain_Spinal_cord_cervical_c-1
ENSG00000196735.11	HLA-DQA1	-8.18262	-0.0504313	2.77736e-16	0.0491089	0.212775	5.57301e-07	#N/A	41	41	41	Brain_Spinal_cord_cervical_c-1
ENSG00000197165.10	SULT1A2	7.84309	0.031901	4.39599e-15	0.108624	0.27182	9.27941e-09	#N/A	27	27	27	Brain_Spinal_cord_cervical_c-1
ENSG00000159915.12	ZNF233	7.77647	0.0625795	7.45791e-15	0.0281113	0.170044	7.36176e-06	#N/A	22	22	22	Brain_Spinal_cord_cervical_c-1
ENSG00000213648.10	SULT1A4	7.70398	0.066478	1.31895e-14	0.0269067	0.0825786	0.00205488	#N/A	10	10	10	Brain_Spinal_cord_cervical_c-1
ENSG00000144152.12	FBLN7	-7.70384	-0.153519	1.32036e-14	0.00560021	0.0762474	0.00405982	#N/A	19	19	19	Brain_Spinal_cord_cervical_c-1
ENSG00000232629.8	HLA-DQB2	7.67822	0.0259207	1.61309e-14	0.175666	0.484775	8.73169e-19	#N/A	47	47	47	Brain_Spinal_cord_cervical_c-1
ENSG00000213672.7	NCKIPSD	7.5982	0.0344385	3.00281e-14	0.111561	0.345084	2.27814e-11	#N/A	15	15	15	Brain_Spinal_cord_cervical_c-1
ENSG00000154328.15	NEIL2	7.53154	0.0633234	5.01456e-14	0.0332964	0.139022	5.82213e-05	#N/A	17	17	17	Brain_Spinal_cord_cervical_c-1
ENSG00000282876.1	RP1-138B7.7	-7.2775	-0.0228071	3.40057e-13	0.174586	0.192286	2.76354e-06	#N/A	105	106	106	Brain_Spinal_cord_cervical_c-1
ENSG00000115204.14	MPV17	7.26676	0.0811565	3.6822e-13	0.0163399	0.0709183	0.00433828	#N/A	27	27	27	Brain_Spinal_cord_cervical_c-1
ENSG00000178252.17	WDR6	-7.18705	-0.0703738	6.62083e-13	0.0239232	0.172781	9.4624e-06	#N/A	20	21	21	Brain_Spinal_cord_cervical_c-1
ENSG00000181315.10	ZNF322	-7.10009	-0.0345584	1.24675e-12	0.086648	0.298102	2.94944e-10	#N/A	58	58	58	Brain_Spinal_cord_cervical_c-1
ENSG00000179344.16	HLA-DQB1	-7.09797	-0.0286947	1.26601e-12	0.126132	0.488539	4.15606e-18	#N/A	34	34	34	Brain_Spinal_cord_cervical_c-1
ENSG00000148384.12	INPP5E	-6.97541	-0.0554771	3.04978e-12	0.0337122	0.265854	4.10186e-09	#N/A	10	12	12	Brain_Spinal_cord_cervical_c-1
ENSG00000170425.3	ADORA2B	-6.94122	-0.0590404	3.8872e-12	0.0247508	0.123109	0.00017747	#N/A	12	12	12	Brain_Spinal_cord_cervical_c-1
ENSG00000066651.18	TRMT11	6.89031	0.0572312	5.56724e-12	0.0287542	0.284029	2.96327e-09	#N/A	51	51	51	Brain_Spinal_cord_cervical_c-1
ENSG00000178952.10	TUFM	6.8902	0.0834665	5.57154e-12	0.0127347	0.0770778	0.00456882	#N/A	20	20	20	Brain_Spinal_cord_cervical_c-1
ENSG00000261390.5	MAFTRR	-6.88301	-0.0301693	5.85994e-12	0.112776	0.216159	1.17243e-07	#N/A	41	48	48	Brain_Spinal_cord_cervical_c-1
ENSG00000272505.1	RP11-981G7.6	6.80035	0.0641079	1.04362e-11	0.0255963	0.109382	0.000300783	#N/A	22	22	22	Brain_Spinal_cord_cervical_c-1
ENSG00000227888.4	FAM66A	6.78026	0.0236366	1.19956e-11	0.183888	0.356099	3.05979e-12	#N/A	39	42	42	Brain_Spinal_cord_cervical_c-1
ENSG00000198502.5	HLA-DRB5	-6.74816	-0.024473	1.49735e-11	0.168951	0.604183	2.62938e-25	#N/A	80	83	83	Brain_Spinal_cord_cervical_c-1
ENSG00000204428.12	LY6G5C	-6.65696	-0.0427262	2.79548e-11	0.0511267	0.253641	3.50989e-08	#N/A	29	29	29	Brain_Spinal_cord_cervical_c-1
ENSG00000142233.11	NTN5	6.56741	0.0506577	5.11967e-11	0.0390014	0.0999776	0.000733655	#N/A	37	37	37	Brain_Spinal_cord_cervical_c-1
ENSG00000130202.9	NECTIN2	6.55893	0.102954	5.41946e-11	0.00838889	0.0393628	0.0322813	#N/A	16	16	16	Brain_Spinal_cord_cervical_c-1
ENSG00000196236.12	XPNPEP3	6.51529	0.043281	7.25499e-11	0.0404292	0.195188	1.45999e-06	#N/A	14	15	15	Brain_Spinal_cord_cervical_c-1
ENSG00000011295.15	TTC19	6.48781	0.0968513	8.7094e-11	0.00803857	0.0981522	0.00130727	#N/A	46	46	46	Brain_Spinal_cord_cervical_c-1
ENSG00000166278.14	C2	-6.43029	-0.322423	1.27364e-10	0.000686336	0.106345	0.000581447	#N/A	2	3	3	Brain_Spinal_cord_cervical_c-1
ENSG00000228022.5	HCG20	6.42767	0.0774591	1.29577e-10	0.0134196	0.154381	3.37585e-05	#N/A	12	12	12	Brain_Spinal_cord_cervical_c-1
ENSG00000175806.14	MSRA	6.41523	0.0609917	1.40611e-10	0.0254576	0.108774	0.000544882	#N/A	14	14	14	Brain_Spinal_cord_cervical_c-1
ENSG00000178467.17	P4HTM	6.33561	0.0579119	2.36397e-10	0.024228	0.271378	8.63593e-10	#N/A	21	22	22	Brain_Spinal_cord_cervical_c-1
ENSG00000212694.8	LINC01089	-6.29091	-0.045808	3.15619e-10	0.0341667	0.162454	1.87486e-05	#N/A	74	74	74	Brain_Spinal_cord_cervical_c-1
ENSG00000214530.8	STARD10	6.27607	0.0754264	3.47228e-10	0.0156053	0.038237	0.049563	#N/A	30	30	30	Brain_Spinal_cord_cervical_c-1
ENSG00000166529.14	ZSCAN21	-6.14746	-0.0620116	7.87338e-10	0.021341	0.110429	0.000335679	#N/A	18	18	18	Brain_Spinal_cord_cervical_c-1
ENSG00000105383.14	CD33	6.1458	0.155923	7.95595e-10	0.00353509	0.114628	0.000367014	#N/A	12	12	12	Brain_Spinal_cord_cervical_c-1
ENSG00000138031.14	ADCY3	-6.14489	-0.0500919	8.00203e-10	0.0377251	0.132773	0.000128251	#N/A	48	48	48	Brain_Spinal_cord_cervical_c-1
ENSG00000204536.13	CCHCR1	-6.06484	-0.0718306	1.32081e-09	0.0144865	0.110318	0.000514402	#N/A	24	26	26	Brain_Spinal_cord_cervical_c-1
ENSG00000125618.16	PAX8	6.05212	0.0335488	1.42955e-09	0.0540523	0.245924	2.27144e-08	#N/A	19	20	20	Brain_Spinal_cord_cervical_c-1
ENSG00000196381.10	ZNF781	-6.03434	-0.0627644	1.5961e-09	0.0156852	0.11565	0.000360332	#N/A	55	56	56	Brain_Spinal_cord_cervical_c-1
ENSG00000187764.11	SEMA4D	5.93711	0.124894	2.90095e-09	0.00539	0.0507736	0.0213496	#N/A	21	21	21	Brain_Spinal_cord_cervical_c-1
ENSG00000108179.13	PPIF	5.89958	0.112092	3.64418e-09	0.00671694	0.121291	0.000167612	#N/A	7	7	7	Brain_Spinal_cord_cervical_c-1
ENSG00000149499.11	EML3	-5.86342	-0.0825823	4.53423e-09	0.0098666	0.127639	0.000157368	#N/A	16	16	16	Brain_Spinal_cord_cervical_c-1
ENSG00000100413.16	POLR3H	5.8413	0.0800463	5.17956e-09	0.00975463	0.0908346	0.0016594	#N/A	22	22	22	Brain_Spinal_cord_cervical_c-1
ENSG00000090861.15	AARS	5.83837	0.069186	5.27151e-09	0.013802	0.117726	0.000168961	#N/A	10	10	10	Brain_Spinal_cord_cervical_c-1
ENSG00000226686.7	LINC01535	5.8127	0.0126762	6.14726e-09	0.372194	0.652125	3.02387e-29	#N/A	45	45	45	Brain_Spinal_cord_cervical_c-1
ENSG00000196275.13	GTF2IRD2	-5.79833	-0.0351626	6.6977e-09	0.0668484	0.301339	1.56586e-10	#N/A	4	5	5	Brain_Spinal_cord_cervical_c-1
ENSG00000149084.12	HSD17B12	-5.70048	-0.0289215	1.19467e-08	0.0786552	0.454878	8.49311e-17	#N/A	51	52	52	Brain_Spinal_cord_cervical_c-1
ENSG00000146205.13	ANO7	5.69368	0.0377618	1.24329e-08	0.0420999	0.11537	0.000363119	#N/A	9	9	9	Brain_Spinal_cord_cervical_c-1
ENSG00000254986.7	DPP3	5.69144	0.137695	1.25974e-08	0.00421109	0.0454144	0.0269142	#N/A	14	15	15	Brain_Spinal_cord_cervical_c-1
ENSG00000115604.10	IL18R1	5.68992	0.0300623	1.27101e-08	0.0776844	0.295007	3.87406e-10	#N/A	37	37	37	Brain_Spinal_cord_cervical_c-1
ENSG00000157322.17	CLEC18A	-5.68221	-0.0196953	1.32964e-08	0.161207	0.443393	5.21548e-16	#N/A	20	20	20	Brain_Spinal_cord_cervical_c-1
ENSG00000067208.14	EVI5	5.66336	0.0699723	1.48436e-08	0.0107952	0.0916256	0.00119727	#N/A	24	24	24	Brain_Spinal_cord_cervical_c-1
ENSG00000213246.6	SUPT4H1	5.60322	0.0456702	2.10411e-08	0.0240607	0.183035	3.50807e-06	#N/A	54	55	55	Brain_Spinal_cord_cervical_c-1
ENSG00000272221.1	XXbac-BPG181B23.7	-5.58778	-0.0335712	2.29989e-08	0.075278	0.258299	2.11359e-08	#N/A	15	15	15	Brain_Spinal_cord_cervical_c-1
ENSG00000253678.1	RP11-981G7.3	5.51541	0.0328193	3.47967e-08	0.0699188	0.158012	3.68171e-06	#N/A	26	26	26	Brain_Spinal_cord_cervical_c-1
ENSG00000176909.11	MAMSTR	5.4994	0.0641745	3.81082e-08	0.0201545	0.162703	1.0182e-05	#N/A	16	16	16	Brain_Spinal_cord_cervical_c-1
ENSG00000236609.3	ZNF853	-5.49747	-0.0712887	3.85286e-08	0.0129675	0.116514	0.000320532	#N/A	18	18	18	Brain_Spinal_cord_cervical_c-1
ENSG00000244731.7	C4A	5.48998	0.0649024	4.01986e-08	0.011493	0.0507979	0.0199413	#N/A	16	17	17	Brain_Spinal_cord_cervical_c-1
ENSG00000100239.15	PPP6R2	-5.47984	-0.0163606	4.2571e-08	0.275035	0.639412	3.02198e-30	#N/A	47	47	47	Brain_Spinal_cord_cervical_c-1
ENSG00000225725.4	FAM66E	-5.40866	-0.0448767	6.34976e-08	0.0339498	0.121161	0.000277914	#N/A	9	9	9	Brain_Spinal_cord_cervical_c-1
ENSG00000137411.16	VARS2	5.39716	0.019489	6.77053e-08	0.151464	0.358361	1.33625e-12	#N/A	65	66	66	Brain_Spinal_cord_cervical_c-1
ENSG00000115234.10	SNX17	-5.38907	-0.0773419	7.08218e-08	0.0122761	0.0633131	0.0103038	#N/A	26	27	27	Brain_Spinal_cord_cervical_c-1
ENSG00000204248.10	COL11A2	5.34043	0.0321779	9.2724e-08	0.0430146	0.0600848	0.0123662	#N/A	76	76	76	Brain_Spinal_cord_cervical_c-1
ENSG00000167711.13	SERPINF2	5.30439	0.0362535	1.13051e-07	0.0414442	0.304512	6.0101e-10	#N/A	21	21	21	Brain_Spinal_cord_cervical_c-1
ENSG00000273295.1	AP000350.5	5.25898	0.0129829	1.44854e-07	0.315153	0.549454	8.83376e-22	#N/A	56	57	57	Brain_Spinal_cord_cervical_c-1
ENSG00000196260.4	SFTA2	5.22316	0.025345	1.75893e-07	0.0931455	0.300355	1.06942e-09	#N/A	13	13	13	Brain_Spinal_cord_cervical_c-1
ENSG00000223496.2	EXOSC6	-5.18681	-0.0148584	2.13924e-07	0.245194	0.636267	7.65848e-29	#N/A	14	15	15	Brain_Spinal_cord_cervical_c-1
ENSG00000249061.1	RP11-72L22.1	-5.18281	-0.0399959	2.18569e-07	0.0204956	0.156191	2.54336e-05	#N/A	14	14	14	Brain_Spinal_cord_cervical_c-1
ENSG00000164989.16	CCDC171	-5.15582	-0.0332959	2.52526e-07	0.0432828	0.198092	1.7082e-06	#N/A	36	36	36	Brain_Spinal_cord_cervical_c-1
ENSG00000145020.15	AMT	5.1396	0.0599683	2.75326e-07	0.0171827	0.150794	2.07375e-05	#N/A	14	14	14	Brain_Spinal_cord_cervical_c-1
ENSG00000233393.1	AP000688.29	5.12556	0.0257406	2.96649e-07	0.0964995	0.166063	1.97415e-06	#N/A	52	55	55	Brain_Spinal_cord_cervical_c-1
ENSG00000134905.16	CARS2	5.12433	0.045559	2.98591e-07	0.0292977	0.206586	4.83773e-07	#N/A	27	28	28	Brain_Spinal_cord_cervical_c-1
ENSG00000162194.12	LBHD1	-5.08909	-0.0468608	3.59793e-07	0.0247059	0.160529	2.49982e-05	#N/A	10	10	10	Brain_Spinal_cord_cervical_c-1
ENSG00000271239.1	RP11-238F2.1	-5.06504	-0.0321362	4.08304e-07	0.0432876	0.0326786	0.0487228	#N/A	58	58	58	Brain_Spinal_cord_cervical_c-1
ENSG00000149177.12	PTPRJ	-5.02247	-0.0374052	5.1012e-07	0.0297133	0.231454	5.84257e-08	#N/A	36	36	36	Brain_Spinal_cord_cervical_c-1
ENSG00000186453.12	FAM228A	4.97268	0.0331172	6.60323e-07	0.042108	0.0681145	0.00724515	#N/A	83	83	83	Brain_Spinal_cord_cervical_c-1
ENSG00000099977.13	DDT	4.84125	0.0231519	1.29022e-06	0.0801527	0.308108	3.59906e-10	#N/A	35	36	36	Brain_Spinal_cord_cervical_c-1
ENSG00000115053.15	NCL	-4.83129	-0.0509148	1.35654e-06	0.0186959	0.0758404	0.0032537	#N/A	25	25	25	Brain_Spinal_cord_cervical_c-1
ENSG00000100994.11	PYGB	4.80907	0.0513869	1.51631e-06	0.0212162	0.124239	0.000248108	#N/A	33	33	33	Brain_Spinal_cord_cervical_c-1
ENSG00000204520.12	MICA	-4.80796	-0.0444871	1.52478e-06	0.0300365	0.188827	2.01058e-06	#N/A	34	35	35	Brain_Spinal_cord_cervical_c-1
ENSG00000175170.14	FAM182B	4.79611	0.0186064	1.61778e-06	0.1631	0.290487	1.12084e-09	#N/A	36	36	36	Brain_Spinal_cord_cervical_c-1
ENSG00000224843.6	LINC00240	-4.79333	-0.0430969	1.64035e-06	0.0243335	0.0671125	0.00665161	#N/A	55	55	55	Brain_Spinal_cord_cervical_c-1
ENSG00000101639.18	CEP192	-4.7889	-0.0182306	1.677e-06	0.150264	0.507475	6.74223e-21	#N/A	31	31	31	Brain_Spinal_cord_cervical_c-1
ENSG00000146112.11	PPP1R18	4.78004	0.138178	1.75259e-06	0.0022153	0.0691287	0.00431635	#N/A	15	15	15	Brain_Spinal_cord_cervical_c-1
ENSG00000155542.11	SETD9	4.77816	0.0161372	1.76906e-06	0.217973	0.514789	1.63656e-21	#N/A	110	110	110	Brain_Spinal_cord_cervical_c-1
ENSG00000109919.9	MTCH2	4.7664	0.0411815	1.87544e-06	0.0254364	0.11738	8.94494e-05	#N/A	31	31	31	Brain_Spinal_cord_cervical_c-1
ENSG00000159228.12	CBR1	4.73888	0.0358126	2.14903e-06	0.0399982	0.233779	5.11742e-08	#N/A	36	37	37	Brain_Spinal_cord_cervical_c-1
ENSG00000254343.2	RP11-760H22.2	-4.72884	-0.0189893	2.25806e-06	0.144416	0.326251	6.46161e-11	#N/A	59	60	60	Brain_Spinal_cord_cervical_c-1
ENSG00000159409.14	CELF3	-4.72038	-0.0469741	2.35402e-06	0.0187522	0.0873414	0.00159639	#N/A	72	73	73	Brain_Spinal_cord_cervical_c-1
ENSG00000166582.9	CENPV	-4.70263	-0.0175493	2.56833e-06	0.145725	0.480658	1.21888e-17	#N/A	35	35	35	Brain_Spinal_cord_cervical_c-1
ENSG00000065060.16	UHRF1BP1	4.65118	0.0486163	3.30048e-06	0.0206785	0.150763	3.57342e-05	#N/A	76	77	77	Brain_Spinal_cord_cervical_c-1
ENSG00000140043.11	PTGR2	-4.64493	-0.0256296	3.40191e-06	0.0591967	0.25731	6.54506e-09	#N/A	28	29	29	Brain_Spinal_cord_cervical_c-1
ENSG00000243789.10	JMJD7	4.63759	0.0334927	3.52496e-06	0.0412017	0.13854	7.10076e-05	#N/A	24	24	24	Brain_Spinal_cord_cervical_c-1
ENSG00000226816.2	AC005082.12	4.60369	0.0267095	4.15067e-06	0.0570631	0.150026	3.60212e-05	#N/A	67	67	67	Brain_Spinal_cord_cervical_c-1
ENSG00000263001.5	GTF2I	-4.59531	-0.0660319	4.32116e-06	0.0116784	0.18098	1.89393e-06	#N/A	33	34	34	Brain_Spinal_cord_cervical_c-1
ENSG00000204315.3	FKBPL	-4.59394	-0.0178915	4.34954e-06	0.138672	0.0498477	0.0211638	#N/A	130	136	136	Brain_Spinal_cord_cervical_c-1
ENSG00000111816.7	FRK	-4.58979	-0.0446481	4.43687e-06	0.0206281	0.102343	0.000669107	#N/A	42	43	43	Brain_Spinal_cord_cervical_c-1
ENSG00000131115.15	ZNF227	-4.58153	-0.0690722	4.61578e-06	0.00878666	0.0548877	0.0103412	#N/A	9	9	9	Brain_Spinal_cord_cervical_c-1
ENSG00000167077.12	MEI1	4.57094	0.0248113	4.85533e-06	0.067387	0.202433	1.06729e-06	#N/A	67	68	68	Brain_Spinal_cord_cervical_c-1
ENSG00000204351.11	SKIV2L	4.56115	0.023864	5.08738e-06	0.0705689	0.250881	3.53465e-09	#N/A	68	69	69	Brain_Spinal_cord_cervical_c-1
ENSG00000103932.11	RPAP1	-4.54186	-0.0490029	5.57599e-06	0.0221009	0.221989	8.87837e-08	#N/A	8	8	8	Brain_Spinal_cord_cervical_c-1
ENSG00000077380.15	DYNC1I2	4.50191	0.121096	6.73444e-06	0.0027354	0.0500634	0.0233091	#N/A	12	12	12	Brain_Spinal_cord_cervical_c-1
ENSG00000240972.1	MIF	4.49883	0.0294193	6.83285e-06	0.0444604	0.184307	1.35944e-06	#N/A	17	17	17	Brain_Spinal_cord_cervical_c-1
ENSG00000153814.11	JAZF1	4.48094	0.0784415	7.43158e-06	0.00556904	0.0557899	0.0152592	#N/A	15	15	15	Brain_Spinal_cord_cervical_c-1
ENSG00000115677.16	HDLBP	-4.47978	-0.0535045	7.47188e-06	0.0151566	0.0558673	0.0136575	#N/A	19	19	19	Brain_Spinal_cord_cervical_c-1
ENSG00000185955.4	C7orf61	4.46732	0.0618565	7.92044e-06	0.0102592	0.0443355	0.0319834	#N/A	53	53	53	Brain_Spinal_cord_cervical_c-1
ENSG00000198373.12	WWP2	4.46155	0.0281576	8.13694e-06	0.0480802	0.297233	1.6968e-10	#N/A	11	12	12	Brain_Spinal_cord_cervical_c-1
ENSG00000196502.11	SULT1A1	-4.43997	-0.0345921	8.99712e-06	0.0325416	0.107816	0.000446809	#N/A	18	18	18	Brain_Spinal_cord_cervical_c-1
ENSG00000130812.10	ANGPTL6	4.43746	0.0384594	9.10275e-06	0.0264211	0.158447	1.43797e-05	#N/A	15	15	15	Brain_Spinal_cord_cervical_c-1
ENSG00000198231.12	DDX42	4.43723	0.0378636	9.11251e-06	0.0236281	0.205459	7.43592e-07	#N/A	44	44	44	Brain_Spinal_cord_cervical_c-1
ENSG00000149541.9	B3GAT3	-4.42163	-0.0499355	9.79589e-06	0.0163352	0.225012	1.78478e-07	#N/A	5	5	5	Brain_Spinal_cord_cervical_c-1
ENSG00000167914.11	GSDMA	4.41757	0.0433983	9.98167e-06	0.0204717	0.132211	0.000124959	#N/A	6	6	6	Brain_Spinal_cord_cervical_c-1
ENSG00000155792.9	DEPTOR	-4.41275	-0.0164419	1.02064e-05	0.166067	0.367664	1.23253e-12	#N/A	82	82	82	Brain_Spinal_cord_cervical_c-1
ENSG00000169203.16	NPIPB12	4.40846	0.0197233	1.0411e-05	0.100243	0.271741	4.22427e-09	#N/A	16	18	18	Brain_Spinal_cord_cervical_c-1
ENSG00000137804.12	NUSAP1	4.36937	0.0192598	1.24607e-05	0.108481	0.365957	5.73519e-13	#N/A	22	22	22	Brain_Spinal_cord_cervical_c-1
ENSG00000137806.8	NDUFAF1	4.35775	0.0294287	1.31404e-05	0.0473408	0.358434	5.74153e-12	#N/A	25	25	25	Brain_Spinal_cord_cervical_c-1
ENSG00000125637.15	PSD4	-4.33686	-0.033315	1.44534e-05	0.0349872	0.299158	9.46893e-10	#N/A	25	25	25	Brain_Spinal_cord_cervical_c-1
ENSG00000238078.1	LINC01352	4.33089	0.0176426	1.48511e-05	0.101017	0.344991	4.56838e-12	#N/A	21	21	21	Brain_Spinal_cord_cervical_c-1
ENSG00000115602.16	IL1RL1	4.32856	0.0258314	1.50084e-05	0.0615755	0.265179	1.34037e-08	#N/A	57	57	57	Brain_Spinal_cord_cervical_c-1
ENSG00000157895.11	C12orf43	-4.32573	-0.0212292	1.52028e-05	0.0576867	0.299	8.69271e-10	#N/A	37	37	37	Brain_Spinal_cord_cervical_c-1
ENSG00000157837.15	SPPL3	-29.9296	-1.03849	8.09939e-197	0.00171708	0.0243942	0.000245416	#N/A	17	18	18	Whole_Blood
ENSG00000160712.12	IL6R	28.0755	0.780706	1.94918e-173	0.00279232	0.0888834	6.32416e-13	#N/A	23	23	23	Whole_Blood
ENSG00000135114.12	OASL	-20.4763	-0.151619	3.50352e-93	0.0473619	0.147273	4.72661e-21	#N/A	79	81	81	Whole_Blood
ENSG00000115216.13	NRBP1	19.4673	0.31262	2.08099e-84	0.00853066	0.0755656	3.03822e-11	#N/A	34	35	35	Whole_Blood
ENSG00000135124.14	P2RX4	-16.5195	-0.112912	2.65793e-61	0.0419577	0.285628	2.67595e-44	#N/A	59	59	59	Whole_Blood
ENSG00000157992.12	KRTCAP3	-14.3399	-0.163444	1.23157e-46	0.0179316	0.0627871	1.94124e-09	#N/A	33	33	33	Whole_Blood
ENSG00000116678.19	LEPR	-14.0611	-0.13214	6.58759e-45	0.0212633	0.153847	2.94321e-22	#N/A	20	20	20	Whole_Blood
ENSG00000186567.12	CEACAM19	-13.9986	-0.16507	1.58958e-44	0.0152615	0.0474242	2.25331e-07	#N/A	25	25	25	Whole_Blood
ENSG00000177051.5	FBXO46	13.7	0.719025	1.01575e-42	0.000717291	0.0112245	0.0133231	#N/A	13	13	13	Whole_Blood
ENSG00000196126.11	HLA-DRB1	-13.6728	-0.207027	1.47688e-42	0.00831531	0.175024	3.05561e-25	#N/A	69	73	73	Whole_Blood
ENSG00000179639.10	FCER1A	-13.1733	-0.379257	1.24967e-39	0.00237522	0.0452208	4.84639e-07	#N/A	4	4	4	Whole_Blood
ENSG00000107798.17	LIPA	12.9933	0.0622832	1.33578e-38	0.0848737	0.372798	3.81184e-61	#N/A	57	59	59	Whole_Blood
ENSG00000188735.12	TMEM120B	-12.7732	-0.675818	2.31406e-37	0.00219554	0.016471	0.0025159	#N/A	48	51	51	Whole_Blood
ENSG00000235888.1	AF064858.8	12.5646	0.140098	3.30697e-36	0.0174921	0.140814	3.24955e-20	#N/A	44	45	45	Whole_Blood
ENSG00000087157.18	PGS1	-12.3253	-1.47297	6.61971e-35	0.000148816	0.0100871	0.0188671	#N/A	3	3	3	Whole_Blood
ENSG00000162711.16	NLRP3	12.2263	0.176925	2.24871e-34	0.00905613	0.0884344	8.527e-13	#N/A	35	36	36	Whole_Blood
ENSG00000160710.15	ADAR	12.0627	0.478595	1.66241e-33	0.00139816	0.0432214	6.73498e-07	#N/A	11	11	11	Whole_Blood
ENSG00000157895.11	C12orf43	12.0319	0.126231	2.41396e-33	0.0202636	0.144049	1.21586e-20	#N/A	14	15	15	Whole_Blood
ENSG00000232837.1	LINC01700	11.954	0.223656	6.18912e-33	0.00638146	0.0456091	4.18014e-07	#N/A	29	29	29	Whole_Blood
ENSG00000134575.9	ACP2	11.9496	0.12618	6.52201e-33	0.0193855	0.161673	2.68939e-23	#N/A	18	18	18	Whole_Blood
ENSG00000138085.16	ATRAID	-11.7677	-0.2594	5.72804e-32	0.00448041	0.0989706	3.04918e-14	#N/A	15	15	15	Whole_Blood
ENSG00000237541.3	HLA-DQA2	11.645	0.0230593	2.43329e-31	0.485233	0.702984	2.22264e-176	#N/A	126	130	130	Whole_Blood
ENSG00000089163.4	SIRT4	-11.4439	-0.160619	2.52396e-30	0.00904038	0.0416715	1.43221e-06	#N/A	15	16	16	Whole_Blood
ENSG00000100221.10	JOSD1	11.33	0.44888	9.32467e-30	0.0013202	0.0199908	0.000840308	#N/A	8	8	8	Whole_Blood
ENSG00000240053.8	LY6G5B	-11.1078	-0.162881	1.14922e-28	0.0102426	0.175006	1.03644e-25	#N/A	38	40	40	Whole_Blood
ENSG00000138080.13	EMILIN1	11.0938	0.125976	1.344e-28	0.0171079	0.0277138	9.1466e-05	#N/A	41	43	43	Whole_Blood
ENSG00000143595.12	AQP10	-11.0303	-0.282272	2.72974e-28	0.00303896	0.0314914	2.79118e-05	#N/A	16	16	16	Whole_Blood
ENSG00000157557.11	ETS2	11.002	0.143713	3.73555e-28	0.0129865	0.144533	6.20929e-21	#N/A	68	72	72	Whole_Blood
ENSG00000100201.20	DDX17	-10.991	-0.164953	4.22284e-28	0.00942568	0.189145	1.54164e-27	#N/A	49	49	49	Whole_Blood
ENSG00000090621.13	PABPC4	-10.8569	-0.325194	1.84917e-27	0.00244316	0.0245762	0.000217748	#N/A	36	36	36	Whole_Blood
ENSG00000136689.18	IL1RN	-10.7776	-0.532764	4.3939e-27	0.000807932	0.037806	4.44747e-06	#N/A	4	4	4	Whole_Blood
ENSG00000183682.7	BMP8A	10.7698	0.222432	4.77966e-27	0.00522918	0.0304907	3.82304e-05	#N/A	7	7	7	Whole_Blood
ENSG00000165915.13	SLC39A13	10.6515	0.343729	1.7159e-26	0.00178179	0.0264296	0.000133779	#N/A	6	6	6	Whole_Blood
ENSG00000198945.7	L3MBTL3	-10.503	-0.0510011	8.36531e-26	0.0917576	0.435371	1.58619e-76	#N/A	26	26	26	Whole_Blood
ENSG00000122971.8	ACADS	10.3147	0.452616	6.04833e-25	0.00102164	0.0200403	0.00086414	#N/A	8	8	8	Whole_Blood
ENSG00000266970.1	RP11-806H10.4	10.2288	0.204929	1.47403e-24	0.00569525	0.0804836	7.63737e-12	#N/A	30	30	30	Whole_Blood
ENSG00000079459.12	FDFT1	10.1444	0.154199	3.50901e-24	0.00940794	0.0539396	2.42499e-08	#N/A	16	16	16	Whole_Blood
ENSG00000237721.1	AF064858.11	10.0361	0.0966945	1.05781e-23	0.0239883	0.119405	3.79065e-17	#N/A	74	78	78	Whole_Blood
ENSG00000108443.13	RPS6KB1	-9.85164	-0.266049	6.74328e-23	0.00264401	0.035366	9.64422e-06	#N/A	28	29	29	Whole_Blood
ENSG00000165916.8	PSMC3	9.82031	0.83678	9.20603e-23	0.000255356	0.0122845	0.00940857	#N/A	8	8	8	Whole_Blood
ENSG00000182179.12	UBA7	-9.61613	-0.0945195	6.83577e-22	0.02095	0.299441	2.03867e-46	#N/A	34	35	35	Whole_Blood
ENSG00000110077.14	MS4A6A	9.32056	0.196741	1.15733e-20	0.00423028	0.107526	2.09862e-15	#N/A	28	28	28	Whole_Blood
ENSG00000187775.16	DNAH17	-9.20165	-0.263067	3.52506e-20	0.00242719	0.0461395	3.39402e-07	#N/A	26	26	26	Whole_Blood
ENSG00000073737.16	DHRS9	9.1694	0.082663	4.75681e-20	0.0280832	0.297211	4.91819e-47	#N/A	32	32	32	Whole_Blood
ENSG00000138031.14	ADCY3	9.11394	0.0268412	7.94417e-20	0.25321	0.540912	4.92542e-108	#N/A	22	22	22	Whole_Blood
ENSG00000138092.10	CENPO	9.05914	0.0379309	1.31482e-19	0.125407	0.333709	3.311e-54	#N/A	19	19	19	Whole_Blood
ENSG00000004534.14	RBM6	-9.05087	-0.0376814	1.41839e-19	0.111984	0.554401	5.14888e-111	#N/A	39	39	39	Whole_Blood
ENSG00000204469.12	PRRC2A	8.99902	0.214929	2.27741e-19	0.00374101	0.131594	7.43653e-19	#N/A	23	23	23	Whole_Blood
ENSG00000260302.1	RP11-973H7.1	-8.99576	-0.0759986	2.34612e-19	0.0290832	0.175475	1.86356e-25	#N/A	36	38	38	Whole_Blood
ENSG00000100242.15	SUN2	8.99461	0.241926	2.37067e-19	0.00281882	0.0218648	0.000473496	#N/A	49	50	50	Whole_Blood
ENSG00000166278.14	C2	-8.9141	-0.106602	4.91815e-19	0.014435	0.0173764	0.00195448	#N/A	107	111	111	Whole_Blood
ENSG00000115137.11	DNAJC27	8.87316	0.0569112	7.11014e-19	0.0530149	0.237884	5.65998e-36	#N/A	21	21	21	Whole_Blood
ENSG00000138028.15	CGREF1	-8.7889	-0.157522	1.51034e-18	0.00657031	0.0320018	2.30822e-05	#N/A	9	9	9	Whole_Blood
ENSG00000214530.8	STARD10	8.78069	0.0892021	1.62472e-18	0.0203063	0.248785	1.78624e-37	#N/A	14	14	14	Whole_Blood
ENSG00000158488.15	CD1E	-8.74384	-0.133886	2.25312e-18	0.00813043	0.0411531	1.73815e-06	#N/A	76	76	76	Whole_Blood
ENSG00000221988.12	PPT2	-8.74325	-0.498412	2.26498e-18	0.000650819	0.0108086	0.0146714	#N/A	7	9	9	Whole_Blood
ENSG00000164077.13	MON1A	-8.68515	-0.194868	3.78233e-18	0.00379736	0.0443756	5.48408e-07	#N/A	36	59	59	Whole_Blood
ENSG00000237609.1	AF064858.10	8.61168	0.123392	7.19952e-18	0.0109438	0.0735096	8.76412e-11	#N/A	13	13	13	Whole_Blood
ENSG00000255046.1	RP11-297N6.4	-8.58643	-0.0788493	8.97112e-18	0.0262367	0.0728963	8.61185e-11	#N/A	10	10	10	Whole_Blood
ENSG00000101246.19	ARFRP1	-8.58034	-0.223568	9.45935e-18	0.0029325	0.0470435	2.35418e-07	#N/A	24	24	24	Whole_Blood
ENSG00000077238.13	IL4R	-8.51087	-0.184672	1.72632e-17	0.00459762	0.143536	1.1118e-20	#N/A	6	6	6	Whole_Blood
ENSG00000187796.13	CARD9	8.47724	0.110674	2.30605e-17	0.0130041	0.207774	2.08923e-30	#N/A	22	25	25	Whole_Blood
ENSG00000204209.11	DAXX	-8.3442	-0.139298	7.16972e-17	0.00736513	0.0645692	1.32965e-09	#N/A	47	48	48	Whole_Blood
ENSG00000204525.16	HLA-C	-8.31014	-0.0361896	9.55919e-17	0.0925531	0.461636	3.86203e-84	#N/A	155	158	158	Whole_Blood
ENSG00000158406.4	HIST1H4H	8.30434	0.212578	1.00378e-16	0.00282466	0.0351759	8.27367e-06	#N/A	9	9	9	Whole_Blood
ENSG00000213719.8	CLIC1	8.25912	0.659151	1.46754e-16	0.000265745	0.0182078	0.00150044	#N/A	33	33	33	Whole_Blood
ENSG00000213699.8	SLC35F6	-8.24182	-0.391104	1.69609e-16	0.000863139	0.0261501	0.000142295	#N/A	15	16	16	Whole_Blood
ENSG00000176422.13	SPRYD4	-8.22595	-0.0417724	1.9365e-16	0.0733368	0.239933	9.84123e-36	#N/A	34	34	34	Whole_Blood
ENSG00000073008.14	PVR	8.08797	0.10904	6.06668e-16	0.0109551	0.0876715	1.01971e-12	#N/A	18	18	18	Whole_Blood
ENSG00000186074.18	CD300LF	7.9965	0.259659	1.28007e-15	0.00174342	0.0499614	1.13344e-07	#N/A	14	14	14	Whole_Blood
ENSG00000164078.12	MST1R	-7.95209	-0.108778	1.8339e-15	0.0100859	0.0205707	0.000732992	#N/A	12	12	12	Whole_Blood
ENSG00000163564.14	PYHIN1	7.95102	0.453241	1.84976e-15	0.000633655	0.0208321	0.000613824	#N/A	20	21	21	Whole_Blood
ENSG00000158373.8	HIST1H2BD	7.90136	0.0931946	2.75871e-15	0.0138296	0.12576	2.75198e-18	#N/A	14	14	14	Whole_Blood
ENSG00000175489.9	LRRC25	-7.88319	-0.105408	3.19123e-15	0.011365	0.196984	6.41342e-29	#N/A	18	18	18	Whole_Blood
ENSG00000198563.13	DDX39B	-7.87287	-0.0659202	3.46603e-15	0.0293379	0.287836	2.27484e-44	#N/A	11	11	11	Whole_Blood
ENSG00000154328.15	NEIL2	7.84845	0.0744365	4.21214e-15	0.0249119	0.127832	2.68519e-18	#N/A	16	16	16	Whole_Blood
ENSG00000129933.20	MAU2	-7.80233	-0.209974	6.07734e-15	0.0026847	0.0689226	3.59188e-10	#N/A	20	20	20	Whole_Blood
ENSG00000213672.7	NCKIPSD	7.8004	0.104482	6.17096e-15	0.0113256	0.148822	1.36808e-21	#N/A	10	10	10	Whole_Blood
ENSG00000168488.18	ATXN2L	-7.79626	-0.194948	6.37672e-15	0.00309149	0.0672716	5.80304e-10	#N/A	20	20	20	Whole_Blood
ENSG00000184110.14	EIF3C	7.78051	0.161838	7.22343e-15	0.00454452	0.0413147	1.49871e-06	#N/A	13	13	13	Whole_Blood
ENSG00000233232.6	NPIPB7	-7.71653	-0.0485927	1.19535e-14	0.0486535	0.153005	4.91936e-22	#N/A	16	16	16	Whole_Blood
ENSG00000196683.10	TOMM7	7.67133	0.0937382	1.70218e-14	0.0129587	0.312678	6.22327e-50	#N/A	12	12	12	Whole_Blood
ENSG00000084676.15	NCOA1	7.65833	1.42357	1.88366e-14	6.46105e-05	0.0113514	0.01268	#N/A	5	5	5	Whole_Blood
ENSG00000011485.14	PPP5C	-7.63287	-0.0443803	2.29589e-14	0.0601751	0.522331	5.23782e-100	#N/A	22	22	22	Whole_Blood
ENSG00000197165.10	SULT1A2	7.52084	0.0183868	5.44263e-14	0.314776	0.595668	2.59043e-126	#N/A	28	29	29	Whole_Blood
ENSG00000267654.1	LINC01882	-7.50481	-0.0428466	6.15181e-14	0.0644797	0.238776	1.19892e-35	#N/A	24	24	24	Whole_Blood
ENSG00000232629.8	HLA-DQB2	7.46797	0.018164	8.14436e-14	0.314473	0.654766	5.65032e-152	#N/A	99	100	100	Whole_Blood
ENSG00000189050.15	RNFT1	7.35952	0.265893	1.84572e-13	0.00158114	0.0334958	1.67984e-05	#N/A	22	22	22	Whole_Blood
ENSG00000178952.10	TUFM	7.30077	0.0309975	2.86133e-13	0.108154	0.569066	2.36469e-117	#N/A	55	55	55	Whole_Blood
ENSG00000172247.3	C1QTNF4	-7.27598	-0.0405727	3.43908e-13	0.0542762	0.17636	5.99861e-26	#N/A	13	13	13	Whole_Blood
ENSG00000133794.17	ARNTL	-7.26995	-0.0743903	3.59624e-13	0.0188876	0.184217	9.32597e-27	#N/A	73	73	73	Whole_Blood
ENSG00000158517.13	NCF1	-7.24873	-0.217967	4.2071e-13	0.00285696	0.0584145	8.94173e-09	#N/A	16	16	16	Whole_Blood
ENSG00000204531.17	POU5F1	7.2473	0.0540508	4.25157e-13	0.0400934	0.209701	8.51278e-31	#N/A	53	53	53	Whole_Blood
ENSG00000204304.11	PBX2	7.23267	0.21073	4.73581e-13	0.00192778	0.0585268	7.75995e-09	#N/A	68	72	72	Whole_Blood
ENSG00000175970.10	UNC119B	7.18177	0.184092	6.88162e-13	0.0032761	0.0455579	3.85385e-07	#N/A	19	19	19	Whole_Blood
ENSG00000213689.11	TREX1	-7.17513	-0.107218	7.22388e-13	0.00887526	0.153235	5.81804e-22	#N/A	30	35	35	Whole_Blood
ENSG00000114054.13	PCCB	-7.17495	-0.143374	7.23316e-13	0.00540399	0.0539014	3.1561e-08	#N/A	15	15	15	Whole_Blood
ENSG00000178252.17	WDR6	-7.16427	-0.0441147	7.82006e-13	0.0528139	0.387128	3.18414e-65	#N/A	68	70	70	Whole_Blood
ENSG00000152409.8	JMY	-7.15551	-0.238892	8.33602e-13	0.00163485	0.062707	1.1093e-09	#N/A	13	13	13	Whole_Blood
ENSG00000011295.15	TTC19	7.13111	0.075882	9.95614e-13	0.0156134	0.152401	6.23418e-22	#N/A	33	34	34	Whole_Blood
ENSG00000134222.16	PSRC1	7.11693	0.090071	1.10361e-12	0.0122416	0.0816227	6.40293e-12	#N/A	18	18	18	Whole_Blood
ENSG00000213760.10	ATP6V1G2	7.11167	0.0637397	1.14647e-12	0.0266604	0.101313	1.41236e-14	#N/A	26	26	26	Whole_Blood
ENSG00000196502.11	SULT1A1	-7.09702	-0.0466872	1.27471e-12	0.0456483	0.28226	1.14764e-43	#N/A	25	26	26	Whole_Blood
ENSG00000204410.14	MSH5	7.07086	0.213255	1.53976e-12	0.00206675	0.0408657	1.72157e-06	#N/A	42	43	43	Whole_Blood
ENSG00000115607.9	IL18RAP	-7.0085	-0.0848362	2.40887e-12	0.0170319	0.341406	2.49572e-56	#N/A	118	119	119	Whole_Blood
ENSG00000138074.14	SLC5A6	6.98522	0.134146	2.84409e-12	0.00621182	0.0911862	4.15174e-13	#N/A	17	17	17	Whole_Blood
ENSG00000224389.8	C4B	-6.95883	-0.0251242	3.43104e-12	0.112962	0.216587	4.90148e-32	#N/A	38	40	40	Whole_Blood
ENSG00000175115.11	PACS1	-6.91507	-0.155823	4.6762e-12	0.00502562	0.115385	1.1566e-16	#N/A	65	65	65	Whole_Blood
ENSG00000164053.19	ATRIP	-6.91428	-0.0758176	4.70244e-12	0.0161714	0.0655619	8.7406e-10	#N/A	28	28	28	Whole_Blood
ENSG00000176476.8	SGF29	-6.89545	-0.0665277	5.36949e-12	0.0229969	0.193293	3.73792e-28	#N/A	40	41	41	Whole_Blood
ENSG00000106258.13	CYP3A5	-6.88083	-0.0733321	5.95041e-12	0.0201078	0.0284876	6.73238e-05	#N/A	54	54	54	Whole_Blood
ENSG00000169682.17	SPNS1	6.86038	0.053176	6.86798e-12	0.0322492	0.381485	1.26132e-63	#N/A	26	27	27	Whole_Blood
ENSG00000274414.1	RP5-965G21.4	-6.84494	-0.304974	7.65055e-12	0.00115274	0.02687	0.000104603	#N/A	4	5	5	Whole_Blood
ENSG00000196735.11	HLA-DQA1	-6.84448	-0.0510589	7.67547e-12	0.035286	0.316639	7.73971e-50	#N/A	73	76	76	Whole_Blood
ENSG00000204356.13	NELFE	6.84367	0.272244	7.71901e-12	0.00129965	0.0264989	0.000122503	#N/A	40	41	41	Whole_Blood
ENSG00000142233.11	NTN5	6.83698	0.0706019	8.0878e-12	0.0206828	0.0315573	2.754e-05	#N/A	59	62	62	Whole_Blood
ENSG00000126091.19	ST3GAL3	-6.77932	-0.335157	1.20743e-11	0.000704579	0.012149	0.00965191	#N/A	5	5	5	Whole_Blood
ENSG00000196236.12	XPNPEP3	6.77199	0.0890483	1.27022e-11	0.0107342	0.0868976	1.2422e-12	#N/A	10	10	10	Whole_Blood
ENSG00000025434.18	NR1H3	6.71622	0.111251	1.86501e-11	0.00751965	0.0141914	0.0049769	#N/A	23	23	23	Whole_Blood
ENSG00000140455.16	USP3	-6.68166	-0.147745	2.36254e-11	0.00440063	0.132437	1.80563e-19	#N/A	23	23	23	Whole_Blood
ENSG00000167074.14	TEF	6.63488	0.0435707	3.24758e-11	0.0464229	0.19222	4.32602e-28	#N/A	35	37	37	Whole_Blood
ENSG00000141027.20	NCOR1	-6.63196	-0.0595277	3.31251e-11	0.0224692	0.172107	2.20289e-25	#N/A	30	30	30	Whole_Blood
ENSG00000125510.15	OPRL1	6.54764	0.100271	5.84544e-11	0.00860739	0.191426	6.15572e-28	#N/A	9	9	9	Whole_Blood
ENSG00000100994.11	PYGB	6.54181	0.0344734	6.07789e-11	0.0838384	0.47964	4.22618e-89	#N/A	31	31	31	Whole_Blood
ENSG00000197457.9	STMN3	6.52791	0.0858749	6.66959e-11	0.0113111	0.153484	5.7132e-22	#N/A	25	25	25	Whole_Blood
ENSG00000130758.7	MAP3K10	6.52444	0.0901483	6.82555e-11	0.0102275	0.172551	2.34515e-25	#N/A	15	15	15	Whole_Blood
ENSG00000148396.18	SEC16A	-6.51428	-0.0554347	7.30412e-11	0.0322805	0.310834	1.95197e-48	#N/A	35	42	42	Whole_Blood
ENSG00000181666.17	HKR1	-6.49647	-0.0826058	8.22272e-11	0.0121435	0.109301	1.27414e-15	#N/A	7	7	7	Whole_Blood
ENSG00000108384.14	RAD51C	-6.47245	-0.0253212	9.64293e-11	0.100597	0.39909	1.60395e-69	#N/A	31	31	31	Whole_Blood
ENSG00000167077.12	MEI1	6.44175	0.0362109	1.18106e-10	0.0662642	0.323515	2.88456e-51	#N/A	53	54	54	Whole_Blood
ENSG00000221838.9	AP4M1	-6.42757	-0.0455034	1.29661e-10	0.0417213	0.226261	1.22272e-33	#N/A	14	14	14	Whole_Blood
ENSG00000102882.11	MAPK3	-6.42618	-0.0797229	1.3085e-10	0.0143255	0.273887	7.74781e-42	#N/A	24	25	25	Whole_Blood
ENSG00000169583.12	CLIC3	-6.39617	-0.954839	1.59322e-10	0.000114575	0.0694881	3.37167e-10	#N/A	3	13	13	Whole_Blood
ENSG00000174564.12	IL20RB	-6.34043	-0.165566	2.2912e-10	0.00313609	0.0122745	0.0097281	#N/A	24	24	24	Whole_Blood
ENSG00000213995.11	NAXD	6.33976	0.0486696	2.3012e-10	0.0398318	0.199936	4.28696e-29	#N/A	25	25	25	Whole_Blood
ENSG00000093167.17	LRRFIP2	6.32951	0.148172	2.45945e-10	0.0034018	0.110519	3.97915e-16	#N/A	13	13	13	Whole_Blood
ENSG00000203896.9	LIME1	-6.30555	-0.14708	2.87179e-10	0.00343623	0.0148982	0.00424786	#N/A	61	63	63	Whole_Blood
ENSG00000173171.14	MTX1	6.30288	0.4156	2.92174e-10	0.000474796	0.0401821	2.01686e-06	#N/A	9	14	14	Whole_Blood
ENSG00000106290.14	TAF6	-6.29956	-0.280313	2.98495e-10	0.00105954	0.0159834	0.00304189	#N/A	15	15	15	Whole_Blood
ENSG00000165689.16	SDCCAG3	-6.25392	-0.081411	4.00286e-10	0.0149736	0.175049	8.23256e-26	#N/A	14	17	17	Whole_Blood
ENSG00000215440.11	NPEPL1	6.20762	0.125495	5.37915e-10	0.00574266	0.0710635	1.74811e-10	#N/A	46	46	46	Whole_Blood
ENSG00000067208.14	EVI5	6.17583	0.125216	6.58172e-10	0.00507978	0.076733	2.02714e-11	#N/A	69	69	69	Whole_Blood
ENSG00000179344.16	HLA-DQB1	-6.17527	-0.0201899	6.60496e-10	0.184107	0.670255	4.56021e-159	#N/A	46	48	48	Whole_Blood
ENSG00000116521.10	SCAMP3	-6.1702	-0.281873	6.82057e-10	0.00116049	0.0306705	3.33237e-05	#N/A	40	44	44	Whole_Blood
ENSG00000149177.12	PTPRJ	-6.15854	-0.148833	7.34186e-10	0.00354395	0.068203	4.81381e-10	#N/A	17	18	18	Whole_Blood
ENSG00000157322.17	CLEC18A	-6.1514	-0.0213829	7.68023e-10	0.169188	0.626076	5.31553e-139	#N/A	19	19	19	Whole_Blood
ENSG00000142655.12	PEX14	6.14514	0.134323	7.98924e-10	0.0039948	0.0645348	1.40334e-09	#N/A	22	22	22	Whole_Blood
ENSG00000125618.16	PAX8	6.09558	0.018495	1.09042e-09	0.188985	0.306373	8.89006e-48	#N/A	73	76	76	Whole_Blood
ENSG00000188612.11	SUMO2	6.09478	0.228799	1.09585e-09	0.00129152	0.0297972	4.89537e-05	#N/A	8	8	8	Whole_Blood
ENSG00000105656.12	ELL	6.08368	0.0768132	1.17453e-09	0.0123478	0.260047	1.42799e-39	#N/A	22	22	22	Whole_Blood
ENSG00000084764.10	MAPRE3	-6.05967	-0.168655	1.36399e-09	0.00278651	0.0233092	0.000330817	#N/A	15	15	15	Whole_Blood
ENSG00000188603.18	CLN3	-6.05426	-0.0990074	1.41069e-09	0.0078723	0.0889429	5.6864e-13	#N/A	36	38	38	Whole_Blood
ENSG00000231925.11	TAPBP	6.00425	0.270368	1.92219e-09	0.000979283	0.054034	3.55222e-08	#N/A	14	15	15	Whole_Blood
ENSG00000179144.4	GIMAP7	5.9995	0.321173	1.97925e-09	0.00075959	0.0368798	5.64699e-06	#N/A	7	7	7	Whole_Blood
ENSG00000149084.12	HSD17B12	-5.98752	-0.0240539	2.13065e-09	0.118403	0.553251	1.27593e-110	#N/A	46	46	46	Whole_Blood
ENSG00000145901.14	TNIP1	-5.96788	-0.118655	2.40362e-09	0.00521869	0.0840697	2.12008e-12	#N/A	17	17	17	Whole_Blood
ENSG00000125637.15	PSD4	-5.94811	-0.0353724	2.7126e-09	0.0597525	0.5821	9.87902e-121	#N/A	71	72	72	Whole_Blood
ENSG00000160783.19	PMF1	5.9325	0.328552	2.98348e-09	0.000649173	0.0339721	1.32767e-05	#N/A	5	5	5	Whole_Blood
ENSG00000072364.12	AFF4	5.91408	0.398256	3.33734e-09	0.000490017	0.039385	2.65839e-06	#N/A	15	16	16	Whole_Blood
ENSG00000116641.17	DOCK7	5.88546	0.0489691	3.96941e-09	0.0242594	0.112056	3.35435e-16	#N/A	76	77	77	Whole_Blood
ENSG00000177535.7	OR2B11	-5.86553	-0.0551245	4.47698e-09	0.0228487	0.0491804	1.45766e-07	#N/A	56	56	56	Whole_Blood
ENSG00000149499.11	EML3	-5.86255	-0.0532699	4.55809e-09	0.0212795	0.278427	2.92931e-43	#N/A	15	15	15	Whole_Blood
ENSG00000204217.13	BMPR2	5.85729	0.0726242	4.70481e-09	0.0127624	0.150535	1.35768e-21	#N/A	19	19	19	Whole_Blood
ENSG00000204248.10	COL11A2	5.84326	0.0733212	5.11876e-09	0.0129009	0.0117109	0.0108081	#N/A	36	37	37	Whole_Blood
ENSG00000139579.12	NABP2	-5.83355	-0.129594	5.42588e-09	0.00374245	0.0224474	0.000450082	#N/A	39	39	39	Whole_Blood
ENSG00000100316.15	RPL3	5.80403	0.285358	6.47407e-09	0.000905792	0.0109527	0.0141947	#N/A	48	49	49	Whole_Blood
ENSG00000110917.7	MLEC	5.79592	0.25211	6.79488e-09	0.0011659	0.0103007	0.0168168	#N/A	11	11	11	Whole_Blood
ENSG00000134571.10	MYBPC3	-5.79336	-0.0658544	6.89936e-09	0.0137579	0.202512	8.72924e-30	#N/A	26	26	26	Whole_Blood
ENSG00000138030.12	KHK	-5.78188	-0.0375572	7.38725e-09	0.0475054	0.169955	6.43413e-25	#N/A	48	51	51	Whole_Blood
ENSG00000189114.6	BLOC1S3	-5.77711	-0.37982	7.5993e-09	0.00054003	0.0329872	1.72173e-05	#N/A	4	4	4	Whole_Blood
ENSG00000100982.11	PCIF1	-5.76771	-0.198927	8.0355e-09	0.00193065	0.056105	1.61016e-08	#N/A	32	32	32	Whole_Blood
ENSG00000198156.10	NPIPB6	5.75386	0.116308	8.72294e-09	0.00534305	0.02538	0.000179186	#N/A	9	10	10	Whole_Blood
ENSG00000198952.8	SMG5	-5.74991	-0.0191115	8.92908e-09	0.195686	0.650588	1.15227e-150	#N/A	18	18	18	Whole_Blood
ENSG00000157349.16	DDX19B	-5.74983	-0.184676	8.9332e-09	0.00201112	0.0403949	2.16131e-06	#N/A	18	18	18	Whole_Blood
ENSG00000181315.10	ZNF322	-5.73893	-0.0614634	9.52776e-09	0.0184809	0.140362	2.72901e-20	#N/A	25	26	26	Whole_Blood
ENSG00000134548.9	SPX	5.69533	0.0893469	1.23135e-08	0.00828551	0.032913	1.9884e-05	#N/A	25	26	26	Whole_Blood
ENSG00000160678.11	S100A1	5.6655	0.0379929	1.46599e-08	0.0477916	0.106845	1.12128e-15	#N/A	31	31	31	Whole_Blood
ENSG00000129219.13	PLD2	5.61458	0.0367448	1.9704e-08	0.0434308	0.267423	8.44781e-41	#N/A	34	35	35	Whole_Blood
ENSG00000160781.15	PAQR6	-5.59101	-0.0208351	2.25753e-08	0.15485	0.635315	2.41331e-142	#N/A	14	14	14	Whole_Blood
ENSG00000163472.18	TMEM79	-5.58613	-0.0447116	2.32183e-08	0.0330835	0.304695	1.6958e-47	#N/A	36	36	36	Whole_Blood
ENSG00000178467.17	P4HTM	5.57325	0.193125	2.50024e-08	0.0017133	0.0366709	5.2744e-06	#N/A	23	23	23	Whole_Blood
ENSG00000141458.12	NPC1	-5.52402	-0.357037	3.31331e-08	0.000504002	0.0111778	0.012515	#N/A	6	6	6	Whole_Blood
ENSG00000205221.12	VIT	5.50155	0.112732	3.76472e-08	0.00434373	0.0358422	7.11238e-06	#N/A	11	11	11	Whole_Blood
ENSG00000198715.11	GLMP	-5.49679	-0.0156477	3.86771e-08	0.271772	0.616497	1.7815e-137	#N/A	58	58	58	Whole_Blood
ENSG00000137404.14	NRM	-5.49225	-0.563146	3.96836e-08	0.000234848	0.0566398	1.20924e-08	#N/A	6	7	7	Whole_Blood
ENSG00000153487.12	ING1	5.4902	0.131039	4.01475e-08	0.00360155	0.0547599	1.67943e-08	#N/A	37	38	38	Whole_Blood
ENSG00000181555.20	SETD2	5.48843	0.123039	4.0553e-08	0.00369627	0.0551375	2.48447e-08	#N/A	46	46	46	Whole_Blood
ENSG00000226979.8	LTA	5.48599	0.299695	4.11156e-08	0.000684092	0.0160673	0.00275948	#N/A	7	7	7	Whole_Blood
ENSG00000142197.12	DOPEY2	-5.48294	-0.153542	4.18325e-08	0.00280889	0.0520882	6.04339e-08	#N/A	19	19	19	Whole_Blood
ENSG00000213658.11	LAT	5.46915	0.300091	4.52207e-08	0.000687372	0.0115595	0.0117582	#N/A	14	14	14	Whole_Blood
ENSG00000041357.15	PSMA4	5.45507	0.161534	4.89538e-08	0.00221199	0.0762012	3.64169e-11	#N/A	20	20	20	Whole_Blood
ENSG00000127483.17	HP1BP3	5.44958	0.0628928	5.04895e-08	0.0132341	0.274739	3.72536e-42	#N/A	22	22	22	Whole_Blood
ENSG00000089041.16	P2RX7	-5.44625	-0.0799488	5.14423e-08	0.0149167	0.0331582	1.75711e-05	#N/A	94	94	94	Whole_Blood
ENSG00000204991.10	SPIRE2	-5.4245	-0.0381211	5.81181e-08	0.0371091	0.168635	2.13689e-24	#N/A	19	20	20	Whole_Blood
ENSG00000160691.18	SHC1	-5.4226	-0.0548912	5.8739e-08	0.0215705	0.153723	3.52332e-23	#N/A	35	35	35	Whole_Blood
ENSG00000263001.5	GTF2I	-5.42022	-0.0785073	5.95257e-08	0.0131302	0.130622	4.56439e-19	#N/A	12	12	12	Whole_Blood
ENSG00000163050.16	COQ8A	5.41827	0.0312026	6.01774e-08	0.0641974	0.374694	5.32523e-62	#N/A	32	32	32	Whole_Blood
ENSG00000160392.13	C19orf47	5.41611	0.0633845	6.09113e-08	0.0140079	0.150691	1.64029e-21	#N/A	17	17	17	Whole_Blood
ENSG00000241563.3	CORT	5.40932	0.109547	6.32631e-08	0.0038979	0.0369992	4.53578e-06	#N/A	6	6	6	Whole_Blood
ENSG00000178878.12	APOLD1	-5.40913	-0.033163	6.33322e-08	0.0549513	0.0894942	5.9895e-13	#N/A	66	66	66	Whole_Blood
ENSG00000196975.15	ANXA4	-5.39886	-0.0930567	6.70672e-08	0.00803604	0.108636	1.26599e-15	#N/A	14	14	14	Whole_Blood
ENSG00000203880.11	PCMTD2	5.39669	0.116129	6.78826e-08	0.00410499	0.10641	3.33278e-15	#N/A	19	19	19	Whole_Blood
ENSG00000184730.10	APOBR	-5.37132	-0.321687	7.81613e-08	0.00057266	0.0190015	0.00123935	#N/A	23	25	25	Whole_Blood
ENSG00000272221.1	XXbac-BPG181B23.7	-5.35614	-0.0217582	8.50195e-08	0.176879	0.609751	7.94513e-133	#N/A	76	80	80	Whole_Blood
ENSG00000258366.7	RTEL1	5.34967	0.193437	8.81148e-08	0.00141665	0.0376263	4.63959e-06	#N/A	16	16	16	Whole_Blood
ENSG00000205903.6	ZNF316	-5.34307	-0.0728813	9.13868e-08	0.0119983	0.131195	1.00248e-18	#N/A	10	10	10	Whole_Blood
ENSG00000167491.17	GATAD2A	5.34119	0.081549	9.23389e-08	0.00825227	0.148042	1.10968e-21	#N/A	14	14	14	Whole_Blood
ENSG00000243156.7	MICAL3	5.33163	0.237435	9.7337e-08	0.000863979	0.0474901	2.48732e-07	#N/A	8	8	8	Whole_Blood
ENSG00000136717.14	BIN1	5.31685	0.0607388	1.05582e-07	0.0143774	0.229084	5.98402e-34	#N/A	32	32	32	Whole_Blood
ENSG00000128881.16	TTBK2	5.29897	0.216406	1.16455e-07	0.00119181	0.0108234	0.0149897	#N/A	17	17	17	Whole_Blood
ENSG00000124562.9	SNRPC	-5.29183	-0.411435	1.21098e-07	0.000313233	0.0265026	0.000127569	#N/A	13	13	13	Whole_Blood
ENSG00000228022.5	HCG20	5.28089	0.0905221	1.28556e-07	0.00765033	0.0318163	2.43475e-05	#N/A	4	4	4	Whole_Blood
ENSG00000120784.15	ZFP30	5.27769	0.0696705	1.30822e-07	0.0132274	0.0911201	3.40255e-13	#N/A	11	11	11	Whole_Blood
ENSG00000138018.17	SELENOI	-5.26545	-0.165966	1.39846e-07	0.00211807	0.0396878	2.28787e-06	#N/A	25	26	26	Whole_Blood
ENSG00000172543.7	CTSW	-5.2418	-0.0494984	1.59015e-07	0.0216886	0.354437	3.09052e-58	#N/A	16	16	16	Whole_Blood
ENSG00000169231.13	THBS3	-5.23935	-0.0402683	1.6114e-07	0.0326939	0.324258	1.46991e-51	#N/A	21	22	22	Whole_Blood
ENSG00000114650.18	SCAP	5.23922	0.120432	1.61255e-07	0.0035304	0.114632	2.08264e-16	#N/A	14	14	14	Whole_Blood
ENSG00000137411.16	VARS2	5.23227	0.0318811	1.67439e-07	0.0626663	0.557492	8.79686e-112	#N/A	54	54	54	Whole_Blood
ENSG00000183150.7	GPR19	5.21669	0.0402375	1.82144e-07	0.0377333	0.11733	6.22584e-17	#N/A	40	40	40	Whole_Blood
ENSG00000108474.16	PIGL	-5.21006	-0.187625	1.88783e-07	0.00140511	0.0492906	1.25601e-07	#N/A	20	20	20	Whole_Blood
ENSG00000109320.11	NFKB1	-5.1835	-0.212802	2.17758e-07	0.00119003	0.0208696	0.000672173	#N/A	20	21	21	Whole_Blood
ENSG00000197037.10	ZSCAN25	-5.16438	-0.0941244	2.41234e-07	0.00382594	0.0331239	1.3976e-05	#N/A	25	25	25	Whole_Blood
ENSG00000273295.1	AP000350.5	5.16278	0.0132518	2.43304e-07	0.296666	0.557385	7.14393e-112	#N/A	59	60	60	Whole_Blood
ENSG00000092020.10	PPP2R3C	-5.1469	-0.0514212	2.64829e-07	0.0207727	0.410777	9.66672e-71	#N/A	33	35	35	Whole_Blood
ENSG00000119408.16	NEK6	5.14068	0.0708454	2.73752e-07	0.00992866	0.119945	1.10454e-17	#N/A	12	13	13	Whole_Blood
ENSG00000111328.6	CDK2AP1	5.13796	0.0295884	2.77736e-07	0.0734732	0.245446	3.76713e-38	#N/A	74	74	74	Whole_Blood
ENSG00000111321.10	LTBR	5.135	0.326877	2.82139e-07	0.000462121	0.0166634	0.00249903	#N/A	10	10	10	Whole_Blood
ENSG00000158792.15	SPATA2L	-5.13145	-0.0553283	2.87514e-07	0.0164761	0.207812	1.5955e-30	#N/A	17	19	19	Whole_Blood
ENSG00000158710.14	TAGLN2	-5.10142	-0.164725	3.37108e-07	0.00208231	0.0407606	1.91484e-06	#N/A	6	6	6	Whole_Blood
ENSG00000018510.13	AGPS	-5.09608	-0.178971	3.46751e-07	0.00162346	0.0460331	3.11048e-07	#N/A	8	15	15	Whole_Blood
ENSG00000146576.12	C7orf26	-5.09255	-0.0619156	3.53279e-07	0.0146979	0.102365	7.51326e-15	#N/A	48	48	48	Whole_Blood
ENSG00000065060.16	UHRF1BP1	5.08632	0.0285584	3.65072e-07	0.0633621	0.399006	1.76115e-68	#N/A	32	34	34	Whole_Blood
ENSG00000196652.11	ZKSCAN5	5.07814	0.104556	3.81151e-07	0.00606818	0.0280284	8.36873e-05	#N/A	25	25	25	Whole_Blood
ENSG00000240972.1	MIF	5.0602	0.0147843	4.18822e-07	0.224991	0.387483	1.15049e-64	#N/A	31	31	31	Whole_Blood
ENSG00000140367.11	UBE2Q2	5.05957	0.186628	4.20193e-07	0.00131062	0.046332	3.07486e-07	#N/A	9	9	9	Whole_Blood
ENSG00000169592.14	INO80E	-5.05179	-0.0822236	4.37685e-07	0.00847371	0.0771063	2.03864e-11	#N/A	22	22	22	Whole_Blood
ENSG00000248810.1	RP11-362F19.1	5.05075	0.0148258	4.4008e-07	0.217172	0.409575	1.60986e-70	#N/A	134	134	134	Whole_Blood
ENSG00000204839.8	MROH6	5.04685	0.0466762	4.49149e-07	0.0208198	0.17503	1.87527e-25	#N/A	44	44	44	Whole_Blood
ENSG00000142168.14	SOD1	5.04275	0.190577	4.5889e-07	0.00174936	0.0235587	0.000316314	#N/A	29	29	29	Whole_Blood
ENSG00000236104.2	ZBTB22	5.03876	0.160462	4.68566e-07	0.00193904	0.050166	9.11635e-08	#N/A	8	8	8	Whole_Blood
ENSG00000108784.9	NAGLU	-5.03562	-0.183809	4.76297e-07	0.00156293	0.0978317	3.30738e-14	#N/A	13	21	21	Whole_Blood
ENSG00000175334.7	BANF1	5.03234	0.158852	4.84539e-07	0.00243462	0.0690977	3.30747e-10	#N/A	22	22	22	Whole_Blood
ENSG00000188227.12	ZNF793	-5.02972	-0.0603933	4.91207e-07	0.0156683	0.0827925	3.88929e-12	#N/A	31	33	33	Whole_Blood
ENSG00000115808.11	STRN	-5.02366	-0.0945854	5.06971e-07	0.00584624	0.119498	4.12379e-17	#N/A	32	32	32	Whole_Blood
ENSG00000077984.5	CST7	-5.02193	-0.0291169	5.11538e-07	0.0632382	0.438881	9.50064e-81	#N/A	91	93	93	Whole_Blood
ENSG00000154319.14	FAM167A	5.01921	0.0245492	5.18839e-07	0.0935026	0.255587	5.77214e-39	#N/A	20	21	21	Whole_Blood
ENSG00000178425.13	NT5DC1	5.0143	0.109995	5.3226e-07	0.00369013	0.0572185	1.33211e-08	#N/A	34	35	35	Whole_Blood
ENSG00000141258.12	SGSM2	-4.9992	-0.158913	5.75676e-07	0.00180084	0.047547	2.44987e-07	#N/A	25	25	25	Whole_Blood
ENSG00000184381.18	PLA2G6	4.98641	0.0949169	6.15112e-07	0.00578393	0.0982713	2.76659e-14	#N/A	4	4	4	Whole_Blood
ENSG00000077585.13	GPR137B	4.98308	0.0368564	6.25815e-07	0.0377422	0.177642	1.28406e-25	#N/A	30	30	30	Whole_Blood
ENSG00000104866.10	PPP1R37	4.97861	0.127243	6.4042e-07	0.00378385	0.0534618	4.26556e-08	#N/A	49	50	50	Whole_Blood
ENSG00000170425.3	ADORA2B	-4.97544	-0.0407808	6.50984e-07	0.0245738	0.126613	4.97946e-18	#N/A	31	32	32	Whole_Blood
ENSG00000246548.3	RP11-7F17.5	-4.97241	-0.100598	6.61243e-07	0.00483666	0.102443	1.15067e-14	#N/A	17	17	17	Whole_Blood
ENSG00000213722.8	DDAH2	-4.94433	-0.166155	7.64047e-07	0.00197257	0.0377137	4.79156e-06	#N/A	38	40	40	Whole_Blood
ENSG00000138399.17	FASTKD1	4.93535	0.0849412	8.00064e-07	0.00753893	0.0626498	1.66447e-09	#N/A	40	40	40	Whole_Blood
ENSG00000231852.6	CYP21A2	-4.93185	-0.0209556	8.14557e-07	0.0649089	0.144478	8.73446e-21	#N/A	44	46	46	Whole_Blood
ENSG00000137942.16	FNBP1L	-4.93096	-0.0570877	8.18263e-07	0.0128707	0.0787209	2.02876e-11	#N/A	9	9	9	Whole_Blood
ENSG00000174903.15	RAB1B	-4.92565	-0.56398	8.40817e-07	0.000191139	0.0257654	0.000140397	#N/A	3	3	3	Whole_Blood
ENSG00000055211.12	GINM1	4.92461	0.0468817	8.453e-07	0.0208363	0.219305	1.12318e-32	#N/A	41	41	41	Whole_Blood
ENSG00000206344.7	HCG27	4.91634	0.0479107	8.8175e-07	0.0279783	0.229347	6.73106e-34	#N/A	172	179	179	Whole_Blood
ENSG00000272506.1	RP4-535B20.4	-4.91276	-0.0894681	8.98011e-07	0.00538883	0.014977	0.00418699	#N/A	17	17	17	Whole_Blood
ENSG00000110871.14	COQ5	4.9109	0.0489117	9.06595e-07	0.0251895	0.293744	1.15533e-45	#N/A	37	37	37	Whole_Blood
ENSG00000205710.3	C17orf107	4.90383	0.0446938	9.39881e-07	0.0228154	0.184089	1.11939e-26	#N/A	13	13	13	Whole_Blood
ENSG00000101460.12	MAP1LC3A	-4.89934	-0.0417721	9.61595e-07	0.0224106	0.199687	2.53558e-29	#N/A	51	53	53	Whole_Blood
ENSG00000134824.13	FADS2	-4.89796	-0.0120044	9.68345e-07	0.338939	0.615839	3.58395e-134	#N/A	58	58	58	Whole_Blood
ENSG00000124920.13	MYRF	-4.89598	-0.0455945	9.78176e-07	0.0274068	0.155328	1.95078e-22	#N/A	6	6	6	Whole_Blood
ENSG00000124222.22	STX16	-4.85006	-0.177968	1.23427e-06	0.00153763	0.0355101	8.35792e-06	#N/A	24	24	24	Whole_Blood
ENSG00000167523.13	SPATA33	4.847	0.0570971	1.25342e-06	0.014801	0.0859866	1.19532e-12	#N/A	20	20	20	Whole_Blood
ENSG00000062282.14	DGAT2	4.8445	0.179517	1.26929e-06	0.00151448	0.0406722	1.36496e-06	#N/A	15	15	15	Whole_Blood
ENSG00000099974.7	DDTL	4.83999	0.051157	1.29843e-06	0.0171391	0.0639273	8.46611e-10	#N/A	31	31	31	Whole_Blood
ENSG00000167711.13	SERPINF2	4.8295	0.0346807	1.36876e-06	0.0393116	0.165246	5.69988e-24	#N/A	9	9	9	Whole_Blood
ENSG00000149485.18	FADS1	-4.82843	-0.0816815	1.37613e-06	0.00742738	0.0216264	0.000559655	#N/A	11	11	11	Whole_Blood
ENSG00000167981.5	ZNF597	-4.82247	-0.0787618	1.41795e-06	0.00664581	0.0198221	0.000966698	#N/A	42	43	43	Whole_Blood
ENSG00000003137.8	CYP26B1	-4.81398	-0.0196457	1.47954e-06	0.113522	0.258253	5.85595e-39	#N/A	39	39	39	Whole_Blood
ENSG00000135535.15	CD164	-4.80395	-0.090571	1.55567e-06	0.00528729	0.166109	1.23907e-24	#N/A	63	64	64	Whole_Blood
ENSG00000115526.10	CHST10	-4.80008	-0.180225	1.58599e-06	0.00128154	0.0166936	0.00226502	#N/A	13	13	13	Whole_Blood
ENSG00000077097.15	TOP2B	4.79781	0.210616	1.6041e-06	0.000880899	0.0190504	0.00119143	#N/A	11	12	12	Whole_Blood
ENSG00000177710.5	SLC35G5	-4.79183	-0.042185	1.65267e-06	0.0352026	0.0667772	6.66166e-10	#N/A	43	43	43	Whole_Blood
ENSG00000164082.14	GRM2	4.79085	0.0791131	1.66074e-06	0.00964626	0.0602883	4.97708e-09	#N/A	32	38	38	Whole_Blood
ENSG00000120253.13	NUP43	4.78718	0.0366358	1.69142e-06	0.0320509	0.289111	2.24857e-44	#N/A	42	42	42	Whole_Blood
ENSG00000167208.14	SNX20	-4.78005	-0.180566	1.75248e-06	0.00136254	0.0210689	0.000653383	#N/A	30	30	30	Whole_Blood
ENSG00000009790.14	TRAF3IP3	4.77933	0.0285267	1.75878e-06	0.0573103	0.32109	2.636e-51	#N/A	35	35	35	Whole_Blood
ENSG00000185022.11	MAFF	4.77126	0.23596	1.83079e-06	0.000852122	0.0220904	0.000474554	#N/A	10	11	11	Whole_Blood
ENSG00000198218.10	QRICH1	-4.7707	-0.0919659	1.83583e-06	0.00581653	0.0786029	1.73978e-11	#N/A	50	50	50	Whole_Blood
ENSG00000108556.7	CHRNE	4.76727	0.0287631	1.86738e-06	0.0521927	0.240606	1.82788e-36	#N/A	11	11	11	Whole_Blood
ENSG00000154016.13	GRAP	-4.76577	-0.223729	1.8813e-06	0.00110107	0.0115654	0.0119782	#N/A	5	6	6	Whole_Blood
ENSG00000151640.12	DPYSL4	4.75645	0.0167929	1.97027e-06	0.191031	0.402099	4.848e-68	#N/A	45	45	45	Whole_Blood
ENSG00000204920.10	ZNF155	4.7551	0.0345577	1.98352e-06	0.0981513	0.348362	1.5367e-56	#N/A	36	36	36	Whole_Blood
ENSG00000134852.14	CLOCK	4.75439	0.207769	1.99043e-06	0.00105922	0.0210053	0.000662583	#N/A	19	19	19	Whole_Blood
ENSG00000146826.16	C7orf43	4.75257	0.0921991	2.00843e-06	0.00501319	0.122627	1.55766e-17	#N/A	17	17	17	Whole_Blood
ENSG00000272787.1	KB-226F1.2	-4.75104	-0.0267297	2.02378e-06	0.0612252	0.134283	2.94919e-19	#N/A	21	22	22	Whole_Blood
ENSG00000160716.5	CHRNB2	-4.7482	-0.0690105	2.05237e-06	0.00831947	0.0410951	1.39706e-06	#N/A	18	18	18	Whole_Blood
ENSG00000136280.15	CCM2	4.74594	0.0659517	2.07541e-06	0.0112901	0.25555	1.04406e-38	#N/A	31	31	31	Whole_Blood
ENSG00000030066.13	NUP160	4.74555	0.330107	2.07944e-06	0.000450098	0.0282083	6.49537e-05	#N/A	4	4	4	Whole_Blood
ENSG00000238078.1	LINC01352	4.7322	0.0327283	2.22094e-06	0.0333975	0.127178	3.76807e-18	#N/A	20	21	21	Whole_Blood
ENSG00000008838.19	MED24	4.72843	0.102945	2.26267e-06	0.00423301	0.121171	1.78752e-17	#N/A	17	17	17	Whole_Blood
ENSG00000254206.5	NPIPB11	4.71726	0.0870815	2.39042e-06	0.00561681	0.0318252	2.14568e-05	#N/A	10	10	10	Whole_Blood
ENSG00000170468.7	RIOX1	4.70764	0.138262	2.50599e-06	0.0020251	0.0174005	0.00190395	#N/A	17	17	17	Whole_Blood
ENSG00000143390.17	RFX5	4.70747	0.183797	2.50811e-06	0.00163147	0.0318095	2.68118e-05	#N/A	21	21	21	Whole_Blood
ENSG00000110079.16	MS4A4A	4.70357	0.119676	2.55655e-06	0.00289608	0.0252206	0.000183419	#N/A	45	45	45	Whole_Blood
ENSG00000142599.17	RERE	4.70067	0.0528802	2.59308e-06	0.0160482	0.259241	4.76761e-39	#N/A	67	68	68	Whole_Blood
ENSG00000248538.6	RP11-10A14.5	4.69828	0.0144115	2.62356e-06	0.207987	0.470799	2.24319e-85	#N/A	48	48	48	Whole_Blood
ENSG00000139132.14	FGD4	4.69148	0.176103	2.71232e-06	0.00147525	0.0378755	4.08952e-06	#N/A	40	40	40	Whole_Blood
ENSG00000101639.18	CEP192	-4.68186	-0.03141	2.84287e-06	0.0466005	0.407456	1.96733e-69	#N/A	20	20	20	Whole_Blood
ENSG00000128872.9	TMOD2	-4.65458	-0.0403531	3.24636e-06	0.0277659	0.241913	4.82517e-36	#N/A	43	43	43	Whole_Blood
ENSG00000149541.9	B3GAT3	-4.65386	-0.189969	3.25781e-06	0.00138217	0.0178443	0.00173162	#N/A	20	20	20	Whole_Blood
ENSG00000166582.9	CENPV	-4.63551	-0.0571747	3.5605e-06	0.0119939	0.0814217	8.05975e-12	#N/A	20	20	20	Whole_Blood
ENSG00000223496.2	EXOSC6	-4.61842	-0.0273194	3.86671e-06	0.0575847	0.414373	2.84722e-71	#N/A	24	25	25	Whole_Blood
ENSG00000127124.14	HIVEP3	-4.6126	-0.0934532	3.97672e-06	0.00464904	0.0784348	1.93166e-11	#N/A	21	21	21	Whole_Blood
ENSG00000157335.20	CLEC18C	4.60724	0.0150013	4.0804e-06	0.183238	0.416358	1.14049e-71	#N/A	24	24	24	Whole_Blood
ENSG00000099977.13	DDT	4.60122	0.0269333	4.20021e-06	0.0605181	0.386499	9.79471e-65	#N/A	66	68	68	Whole_Blood
ENSG00000142733.14	MAP3K6	4.59892	0.0668277	4.24685e-06	0.0119143	0.0510547	8.27882e-08	#N/A	19	19	19	Whole_Blood
ENSG00000025156.12	HSF2	4.59882	0.0409785	4.24892e-06	0.0222125	0.209441	3.75152e-31	#N/A	25	25	25	Whole_Blood
ENSG00000089154.10	GCN1	4.59053	0.236918	4.42119e-06	0.000733804	0.032298	2.37993e-05	#N/A	23	23	23	Whole_Blood
ENSG00000152133.14	GPATCH11	-4.58449	-0.094964	4.55093e-06	0.00485657	0.015853	0.00314385	#N/A	47	49	49	Whole_Blood
ENSG00000132823.10	OSER1	-4.56986	-0.0537258	4.88054e-06	0.0157357	0.28905	2.20191e-44	#N/A	8	8	8	Whole_Blood
ENSG00000144668.11	ITGA9	4.56773	0.0471286	4.93032e-06	0.018933	0.135397	1.02034e-19	#N/A	39	41	41	Whole_Blood
ENSG00000104783.11	KCNN4	4.56377	0.023566	5.02425e-06	0.0684749	0.295314	5.28546e-46	#N/A	35	35	35	Whole_Blood
ENSG00000116406.18	EDEM3	-4.56028	-0.332541	5.10854e-06	0.000403345	0.0412114	1.53817e-06	#N/A	5	5	5	Whole_Blood
ENSG00000125611.15	CHCHD5	-4.54092	-0.101883	5.60084e-06	0.00377393	0.0525128	5.11482e-08	#N/A	29	30	30	Whole_Blood
ENSG00000163660.11	CCNL1	4.50548	0.116427	6.62235e-06	0.00357383	0.111917	3.74644e-16	#N/A	64	64	64	Whole_Blood

## Sheet: MCP1
gene	gene_name	zscore	effect_size	pvalue	var_g	pred_perf_r2	pred_perf_pval	pred_perf_qval	n_snps_used	n_snps_in_cov	n_snps_in_model	type
ENSG00000179639.10	FCER1A	6.97184	1.21703	3.12814e-12	0.00385304	0.033532	0.000300497	#N/A	10	10	10	Adipose_Visceral_Omentum
ENSG00000163568.14	AIM2	4.69454	0.548037	2.67206e-06	0.0102591	0.0561915	1.66139e-06	#N/A	31	33	33	Adipose_Visceral_Omentum
ENSG00000163131.10	CTSS	-4.50054	-0.558899	6.77808e-06	0.00829077	0.153061	8.90389e-16	#N/A	27	29	29	Adipose_Visceral_Omentum
ENSG00000172215.5	CXCR6	-7.3477	-1.07366	2.01646e-13	0.00490734	0.0342354	6.31316e-05	#N/A	12	12	12	Artery_Tibial
ENSG00000179639.10	FCER1A	5.83642	0.551061	5.33358e-09	0.0131559	0.111873	8.09566e-14	#N/A	22	24	24	Artery_Tibial
ENSG00000143457.10	GOLPH3L	4.66336	1.07014	3.11085e-06	0.00239597	0.0569195	1.76913e-07	#N/A	23	23	23	Artery_Tibial
ENSG00000178055.11	PRSS42	-6.5913	-0.635294	4.36e-11	0.0122195	0.0270122	0.0341281	#N/A	25	25	25	Brain_Caudate_basal_ganglia
ENSG00000012223.12	LTF	-5.46946	-0.463914	4.51407e-08	0.0164934	0.0921803	7.60725e-05	#N/A	4	4	4	Brain_Caudate_basal_ganglia
ENSG00000163820.14	FYCO1	4.98063	1.01262	6.33792e-07	0.00285266	0.0329151	0.0198605	#N/A	21	21	21	Brain_Caudate_basal_ganglia
ENSG00000179639.10	FCER1A	5.56459	0.540321	2.62766e-08	0.0118703	0.0911062	0.000186036	#N/A	7	8	8	Brain_Hypothalamus
ENSG00000144791.9	LIMD1	-5.24479	-0.431112	1.56461e-07	0.0194588	0.0585663	0.0031922	#N/A	39	41	41	Brain_Hypothalamus
ENSG00000012223.12	LTF	-4.98907	-0.2713	6.06706e-07	0.0415952	0.148106	5.64408e-07	#N/A	15	15	15	Brain_Hypothalamus
ENSG00000177807.8	KCNJ10	-4.44949	-0.719815	8.60734e-06	0.00580392	0.0787456	0.000513906	#N/A	57	59	59	Brain_Hypothalamus
ENSG00000107105.14	ELAVL2	-4.43472	-0.662559	9.21902e-06	0.00264668	0.0297043	0.0401571	#N/A	16	18	18	Brain_Putamen_basal_ganglia
ENSG00000211456.10	SACM1L	5.59235	0.283376	2.24015e-08	0.0415697	0.272879	6.67582e-09	#N/A	39	39	39	Brain_Spinal_cord_cervical_c-1
ENSG00000012223.12	LTF	-5.1365	-0.148222	2.79896e-07	0.154446	0.222098	8.32299e-08	#N/A	52	53	53	Brain_Spinal_cord_cervical_c-1
ENSG00000163820.14	FYCO1	4.60441	0.30008	4.1363e-06	0.0252422	0.119346	0.000243149	#N/A	66	66	66	Brain_Spinal_cord_cervical_c-1
ENSG00000283646.1	LINC02009	-4.51829	-0.278912	6.23423e-06	0.0294004	0.0738754	0.00509711	#N/A	20	20	20	Brain_Spinal_cord_cervical_c-1
ENSG00000179639.10	FCER1A	6.83982	1.5266	7.92919e-12	0.00237522	0.0452208	4.84639e-07	#N/A	4	4	4	Whole_Blood
ENSG00000173585.15	CCR9	5.74765	0.556201	9.04902e-09	0.0121405	0.0115673	0.0120593	#N/A	66	66	66	Whole_Blood
ENSG00000183625.14	CCR3	-5.42122	-0.238871	5.91929e-08	0.0623483	0.266126	1.88756e-40	#N/A	37	37	37	Whole_Blood
ENSG00000093183.13	SEC22C	-5.15741	-1.78653	2.50385e-07	0.000877676	0.0290868	5.71909e-05	#N/A	6	6	6	Whole_Blood
ENSG00000143379.12	SETDB1	4.93483	1.67246	8.02218e-07	0.00111378	0.0480481	1.71269e-07	#N/A	11	11	11	Whole_Blood
ENSG00000143457.10	GOLPH3L	-4.6322	-0.73094	3.61803e-06	0.00512655	0.0777979	1.79594e-11	#N/A	15	15	15	Whole_Blood
ENSG00000163823.3	CCR1	4.51594	0.232737	6.30368e-06	0.0450604	0.33091	1.20613e-53	#N/A	36	37	37	Whole_Blood
